# Supplementary material for: Food perception without ingestion leads to metabolic changes and irreversible developmental arrest in C. elegans
Source: BMC Biol. 2018 Oct 8;16:112. doi: 10.1186/s12915-018-0579-3 (PMC6176503; doi:10.1186/s12915-018-0579-3)
Supplement: Supplementary file 3 — Dataset S1. mRNA-seq analysis of food perception. Results of mRNA-seq analysis, including counts per gene, logFC, FDR, GOrilla analysis, and GO term gene lists used are included. (XLSX 18186 kb) [file 12915_2018_579_MOESM3_ESM.xlsx]

## Sheet: README
Sheet:
Avs.B	These 7 sheets are the results of 7 analyses, each on a separate sheet.
	edgeR was used on count tables for differential expression analysis. The count tables for the two batches were combined for filtering. The count table was first filtered to contain those annotated as genes, reducing the number of genes to 22581.
	Genes were further filtered by including only genes with counts per million (CPM) > 1 across 4 libraries. This resulted in 18190 genes.
	edgeR exact test was used for seven pairwise comparisons
	Columns include the gene symbol, sequence name, wormbase identifier, the log2 fold change (FC), log2 counts per million (CPM), P-value, and false discovery rate (FDR). These values are included for all genes included in the analysis.
	In pairwise comparisons A vs. B, logFC represents log2(B/A). Negative fold changes are down in B relative to A, positive are up in B relative to A
	A gene is considered differentially expressed for the pairwise tests if it has FDR<0.05 and the absolute value of its log2(FC) is greater than 0.5. These are color-coded in green.
	Pairwise comparisons include:
	(1) Ivermectin at 1 hour vs. Ivermectin + Food at 1 hour (I_1hr vs. IF_1hr): 1258 genes
	(2) Ivermectin at 24 hours vs. Ivermectin + Food at 24 hours (I_24hr vs. IF_24hr): 241 genes
	(3) Ivermectin at 1 hour vs. Ivermectin at 24 hours (I_1hr vs. I_24hr): 1195 genes
	(4) Ivermectin + Food at 1 hour vs. Ivermectin + Food at 24 hours (IF_1hr vs. IF_24hr):2108 genes
	(5) No Ivermectin No Food at 1hr vs. No Ivermectin Food at 1hr: 5551 genes
	(6) Ivermectin Food at 1hr vs. No Ivermectin Food at 1hr: 10931 genes
	(7) Ivermectin No Food at 1hr vs. No Ivermectin No Food at 1hr: 10265 genes
CPM	The table of the counts per million (CPM) for all genes included in the analysis.
GOrilla	This sheet shows the background set and target sets as well as the outputs of three GOrilla analyses using the GOrilla website.
Larval Development genes	This sheet is the list of genes in the GO:0002164 larval development GO term acquired from AmiGO 2 on September 25, 2017.
Metabolic process genes	This sheet is the list of genes in the GO:0044710 metabolic process GO term acquired from AmiGO 2 on September 25, 2017.
	PCA was done using the 18190 genes that passed filtering

## Sheet: (1) I_1hrvs.IF_1hr
sequence	symbol	primaryIdentifier	logFC	logCPM	PValue	FDR	briefDescription
F58E6.12	2017-03-01	WBGene00077696	NA	NA	NA	NA
D2089.2	2017-03-02	WBGene00008433	-0.143987	0.287341	0.774567	1
C17E4.3	2017-03-03	WBGene00007643	0.777582	2.09319	0.0131339	0.137783
C53D5.2	2017-03-04	WBGene00016903	-0.170914	4.44407	0.281356	0.870296
Y57A10B.1	2017-03-05	WBGene00013273	-0.282726	5.40569	0.0508457	0.356006
F55A3.1	2017-03-06	WBGene00018847	-0.134018	7.02973	0.414912	0.975402
ZK455.8	2017-10-02	WBGene00003843	-0.328187	3.64445	0.0624628	0.404918
C17H12.15	21ur-10011	WBGene00165811	NA	NA	NA	NA
R05G6.14	21ur-10108	WBGene00165509	NA	NA	NA	NA
Y105C5A.1113	21ur-10134	WBGene00172841	NA	NA	NA	NA
R03E9.5	21ur-10165	WBGene00169846	NA	NA	NA	NA
Y37A1B.158	21ur-10200	WBGene00165571	NA	NA	NA	NA
H16O14.66	21ur-10246	WBGene00172830	NA	NA	NA	NA
Y73F8A.725	21ur-10282	WBGene00168462	NA	NA	NA	NA
R05G6.16	21ur-10300	WBGene00168401	NA	NA	NA	NA
F11E6.13	21ur-10303	WBGene00167431	NA	NA	NA	NA
C02D4.4	21ur-10341	WBGene00174757	NA	NA	NA	NA
M199.12	21ur-1037	WBGene00045832	NA	NA	NA	NA
Y4C6B.58	21ur-10372	WBGene00169195	NA	NA	NA	NA
Y73B6BL.181	21ur-10390	WBGene00170536	NA	NA	NA	NA
Y105C5B.549	21ur-104	WBGene00050400	NA	NA	NA	NA
Y17G9A.83	21ur-10451	WBGene00174942	NA	NA	NA	NA
Y105C5A.173	21ur-1046	WBGene00047050	NA	NA	NA	NA
Y4C6B.84	21ur-10481	WBGene00173323	NA	NA	NA	NA
B0513.74	21ur-10500	WBGene00172007	NA	NA	NA	NA
F13G11.110	21ur-10517	WBGene00171265	NA	NA	NA	NA
C46G7.75	21ur-10530	WBGene00169956	NA	NA	NA	NA
Y73F8A.602	21ur-10556	WBGene00166467	NA	NA	NA	NA
Y57G11A.127	21ur-10580	WBGene00167551	NA	NA	NA	NA
Y116A8A.69	21ur-10595	WBGene00165462	NA	NA	NA	NA
F02H6.40	21ur-10600	WBGene00166002	NA	NA	NA	NA
Y7A9A.65	21ur-10668	WBGene00171068	NA	NA	NA	NA
T08B6.59	21ur-10686	WBGene00174315	NA	NA	NA	NA
M03D4.61	21ur-10693	WBGene00171652	NA	NA	NA	NA
H16O14.47	21ur-10695	WBGene00170588	NA	NA	NA	NA
Y39C12A.13	21ur-10699	WBGene00171419	NA	NA	NA	NA
Y105C5B.858	21ur-10713	WBGene00168203	NA	NA	NA	NA
C35D6.106	21ur-10757	WBGene00173312	NA	NA	NA	NA
Y116A8C.244	21ur-10762	WBGene00166712	NA	NA	NA	NA
Y116A8A.77	21ur-10793	WBGene00166377	NA	NA	NA	NA
Y4C6B.88	21ur-10864	WBGene00174025	NA	NA	NA	NA
C52E4.10	21ur-10927	WBGene00169538	NA	NA	NA	NA
Y43B11AR.8	21ur-11037	WBGene00165642	NA	NA	NA	NA
B0513.49	21ur-11045	WBGene00165887	NA	NA	NA	NA
F13E9.17	21ur-11057	WBGene00166271	NA	NA	NA	NA
Y116A8A.70	21ur-11062	WBGene00165515	NA	NA	NA	NA
C45E5.32	21ur-11077	WBGene00169158	NA	NA	NA	NA
F56C4.5	21ur-11084	WBGene00165324	NA	NA	NA	NA
C06E4.14	21ur-11085	WBGene00171872	NA	NA	NA	NA
C08F11.84	21ur-11135	WBGene00168880	NA	NA	NA	NA
B0513.53	21ur-11173	WBGene00167133	NA	NA	NA	NA
Y51H4A.806	21ur-11213	WBGene00172573	NA	NA	NA	NA
F44D12.15	21ur-11264	WBGene00174184	NA	NA	NA	NA
C10G6.44	21ur-11311	WBGene00171895	NA	NA	NA	NA
C31H1.61	21ur-11315	WBGene00169342	NA	NA	NA	NA
C24D10.28	21ur-11328	WBGene00167919	NA	NA	NA	NA
Y116A8A.105	21ur-11360	WBGene00170600	NA	NA	NA	NA
C17H12.21	21ur-11363	WBGene00167726	NA	NA	NA	NA
Y41E3.335	21ur-11369	WBGene00169389	NA	NA	NA	NA
C09B9.21	21ur-1140	WBGene00049889	NA	NA	NA	NA
Y51H4A.674	21ur-11428	WBGene00170223	NA	NA	NA	NA
Y57G11C.655	21ur-11432	WBGene00167463	NA	NA	NA	NA
K08E4.9	21ur-11438	WBGene00172658	NA	NA	NA	NA
Y57G11C.632	21ur-11440	WBGene00167083	NA	NA	NA	NA
Y116A8B.55	21ur-11450	WBGene00169244	NA	NA	NA	NA
Y73B6BL.99	21ur-11466	WBGene00165893	NA	NA	NA	NA
C45E5.48	21ur-11469	WBGene00173716	NA	NA	NA	NA
F20B10.4	21ur-11492	WBGene00174089	NA	NA	NA	NA
Y73F8A.1020	21ur-11512	WBGene00172983	NA	NA	NA	NA
T12F5.6	21ur-11567	WBGene00174161	NA	NA	NA	NA
Y73F8A.579	21ur-11599	WBGene00166113	NA	NA	NA	NA
C43G2.22	21ur-11602	WBGene00172516	NA	NA	NA	NA
Y105C5A.889	21ur-11625	WBGene00169903	NA	NA	NA	NA
ZC513.13	21ur-11653	WBGene00171505	NA	NA	NA	NA
Y105C5A.771	21ur-11698	WBGene00168608	NA	NA	NA	NA
Y105C5B.1110	21ur-11709	WBGene00171303	NA	NA	NA	NA
Y43D4A.20	21ur-1171	WBGene00046701	NA	NA	NA	NA
C07A12.8	21ur-11723	WBGene00169464	NA	NA	NA	NA
Y73F8A.371	21ur-1173	WBGene00049372	NA	NA	NA	NA
R57.3	21ur-11815	WBGene00173568	NA	NA	NA	NA
C31H1.49	21ur-11825	WBGene00168120	NA	NA	NA	NA
Y57G11C.705	21ur-11837	WBGene00168180	NA	NA	NA	NA
C10C5.8	21ur-11845	WBGene00171141	NA	NA	NA	NA
C41G7.12	21ur-11854	WBGene00170964	NA	NA	NA	NA
Y51H4A.820	21ur-11887	WBGene00172759	NA	NA	NA	NA
Y105C5B.1339	21ur-11934	WBGene00174141	NA	NA	NA	NA
Y57G11B.85	21ur-1200	WBGene00049858	NA	NA	NA	NA
H16O14.38	21ur-12040	WBGene00168971	NA	NA	NA	NA
H16O14.12	21ur-1207	WBGene00048170	NA	NA	NA	NA
Y116A8A.116	21ur-12084	WBGene00172161	NA	NA	NA	NA
C08F11.95	21ur-12100	WBGene00170744	NA	NA	NA	NA
Y64G10A.166	21ur-12132	WBGene00165004	NA	NA	NA	NA
C10F3.8	21ur-12141	WBGene00170602	NA	NA	NA	NA
W03F8.64	21ur-12146	WBGene00174106	NA	NA	NA	NA
Y57G11C.1091	21ur-12172	WBGene00174356	NA	NA	NA	NA
T28A11.23	21ur-12191	WBGene00167221	NA	NA	NA	NA
Y37A1A.9	21ur-1220	WBGene00045853	NA	NA	NA	NA
R09D1.15	21ur-12211	WBGene00174501	NA	NA	NA	NA
C06A6.8	21ur-12272	WBGene00173053	NA	NA	NA	NA
Y73F8A.694	21ur-12294	WBGene00168028	NA	NA	NA	NA
F55B11.90	21ur-12346	WBGene00168915	NA	NA	NA	NA
C39H7.52	21ur-12452	WBGene00171566	NA	NA	NA	NA
C47A4.134	21ur-12463	WBGene00173389	NA	NA	NA	NA
T07A9.16	21ur-12468	WBGene00165558	NA	NA	NA	NA
Y105C5A.141	21ur-1252	WBGene00046672	NA	NA	NA	NA
Y57G11A.133	21ur-12533	WBGene00167997	NA	NA	NA	NA
B0513.20	21ur-1259	WBGene00047184	NA	NA	NA	NA
B0513.51	21ur-12638	WBGene00166995	NA	NA	NA	NA
B0273.74	21ur-12646	WBGene00169739	NA	NA	NA	NA
C46G7.44	21ur-12657	WBGene00166134	NA	NA	NA	NA
Y40H7A.273	21ur-12671	WBGene00172475	NA	NA	NA	NA
H32C10.47	21ur-12672	WBGene00168773	NA	NA	NA	NA
M03D4.53	21ur-12730	WBGene00170433	NA	NA	NA	NA
T06D10.4	21ur-12762	WBGene00168700	NA	NA	NA	NA
C52D10.120	21ur-12765	WBGene00174201	NA	NA	NA	NA
Y4C6B.50	21ur-12773	WBGene00167301	NA	NA	NA	NA
T08E11.9	21ur-12798	WBGene00170391	NA	NA	NA	NA
Y17G9A.53	21ur-12825	WBGene00168750	NA	NA	NA	NA
Y40C5A.13	21ur-12912	WBGene00173345	NA	NA	NA	NA
Y57G11C.412	21ur-1296	WBGene00049945	NA	NA	NA	NA
F41H10.32	21ur-12984	WBGene00173551	NA	NA	NA	NA
F28B12.4	21ur-12994	WBGene00173618	NA	NA	NA	NA
M199.40	21ur-130	WBGene00048938	NA	NA	NA	NA
T04C12.12	21ur-13032	WBGene00173298	NA	NA	NA	NA
Y43C5A.8	21ur-13111	WBGene00169881	NA	NA	NA	NA
Y105C5A.977	21ur-13151	WBGene00171006	NA	NA	NA	NA
Y105C5A.1169	21ur-13156	WBGene00173624	NA	NA	NA	NA
C33D9.12	21ur-13190	WBGene00172426	NA	NA	NA	NA
C06A12.16	21ur-13216	WBGene00174744	NA	NA	NA	NA
C42C1.17	21ur-13227	WBGene00166374	NA	NA	NA	NA
M18.10	21ur-13274	WBGene00170152	NA	NA	NA	NA
T24H10.9	21ur-13301	WBGene00172467	NA	NA	NA	NA
C02B10.54	21ur-13307	WBGene00170812	NA	NA	NA	NA
C45E5.22	21ur-13314	WBGene00166300	NA	NA	NA	NA
C08G5.8	21ur-13316	WBGene00173635	NA	NA	NA	NA
F02H6.29	21ur-1334	WBGene00049888	NA	NA	NA	NA
ZC404.14	21ur-13378	WBGene00174084	NA	NA	NA	NA
Y7A9A.17	21ur-1343	WBGene00048838	NA	NA	NA	NA
Y73F8A.952	21ur-13438	WBGene00172026	NA	NA	NA	NA
C01B10.33	21ur-13554	WBGene00171712	NA	NA	NA	NA
Y73F8A.946	21ur-13562	WBGene00171956	NA	NA	NA	NA
R05A10.25	21ur-1362	WBGene00047075	NA	NA	NA	NA
Y67A10A.291	21ur-13629	WBGene00172537	NA	NA	NA	NA
Y73B6BL.75	21ur-1363	WBGene00049373	NA	NA	NA	NA
C45E5.42	21ur-13656	WBGene00171750	NA	NA	NA	NA
F26D12.84	21ur-13665	WBGene00173659	NA	NA	NA	NA
Y116A8A.113	21ur-13670	WBGene00171932	NA	NA	NA	NA
M199.42	21ur-137	WBGene00048989	NA	NA	NA	NA
M03D4.19	21ur-1374	WBGene00049070	NA	NA	NA	NA
F56D5.11	21ur-13782	WBGene00168589	NA	NA	NA	NA
Y41E3.323	21ur-13798	WBGene00168949	NA	NA	NA	NA
Y4C6B.38	21ur-13817	WBGene00166141	NA	NA	NA	NA
B0238.17	21ur-13827	WBGene00172308	NA	NA	NA	NA
Y40C5A.9	21ur-13845	WBGene00166567	NA	NA	NA	NA
C52E4.11	21ur-13859	WBGene00170171	NA	NA	NA	NA
W03F9.12	21ur-13870	WBGene00170056	NA	NA	NA	NA
F26D12.65	21ur-13885	WBGene00170335	NA	NA	NA	NA
C25G4.14	21ur-13902	WBGene00169319	NA	NA	NA	NA
K10B4.7	21ur-13919	WBGene00169175	NA	NA	NA	NA
C10G6.48	21ur-13946	WBGene00174190	NA	NA	NA	NA
C53A5.15	21ur-13956	WBGene00170121	NA	NA	NA	NA
E03H12.18	21ur-14036	WBGene00169595	NA	NA	NA	NA
B0547.23	21ur-14076	WBGene00171305	NA	NA	NA	NA
B0273.23	21ur-1410	WBGene00048145	NA	NA	NA	NA
M02D8.8	21ur-14115	WBGene00171917	NA	NA	NA	NA
C36E6.9	21ur-14151	WBGene00168732	NA	NA	NA	NA
Y57G11C.1013	21ur-14408	WBGene00173216	NA	NA	NA	NA
T05F1.14	21ur-14451	WBGene00170280	NA	NA	NA	NA
Y57G11A.160	21ur-14454	WBGene00169851	NA	NA	NA	NA
Y40H7A.230	21ur-14502	WBGene00169752	NA	NA	NA	NA
F36H12.42	21ur-14515	WBGene00167105	NA	NA	NA	NA
R09B5.14	21ur-14524	WBGene00174088	NA	NA	NA	NA
F44E8.33	21ur-14557	WBGene00170674	NA	NA	NA	NA
R13H7.5	21ur-14595	WBGene00167090	NA	NA	NA	NA
Y37A1B.248	21ur-14666	WBGene00170211	NA	NA	NA	NA
VF13D12L.4	21ur-14685	WBGene00168899	NA	NA	NA	NA
D1022.10	21ur-14726	WBGene00168580	NA	NA	NA	NA
K03B8.13	21ur-14733	WBGene00169361	NA	NA	NA	NA
C24A11.10	21ur-14736	WBGene00173516	NA	NA	NA	NA
Y73F8A.345	21ur-1476	WBGene00049094	NA	NA	NA	NA
F57B10.15	21ur-14797	WBGene00173303	NA	NA	NA	NA
R07B7.18	21ur-14827	WBGene00170459	NA	NA	NA	NA
Y7A9A.68	21ur-14835	WBGene00171688	NA	NA	NA	NA
F44E8.24	21ur-14836	WBGene00167225	NA	NA	NA	NA
F25B4.10	21ur-14854	WBGene00167025	NA	NA	NA	NA
F42A6.10	21ur-14887	WBGene00166372	NA	NA	NA	NA
Y41E3.407	21ur-14893	WBGene00172022	NA	NA	NA	NA
F13G11.56	21ur-14927	WBGene00165222	NA	NA	NA	NA
Y73F8A.1027	21ur-14940	WBGene00173036	NA	NA	NA	NA
Y10G11A.37	21ur-14979	WBGene00166525	NA	NA	NA	NA
C09B9.43	21ur-15004	WBGene00167714	-0.13653	1.31751	0.700326	1
W02D7.13	21ur-15011	WBGene00170538	NA	NA	NA	NA
Y105E8A.35	21ur-15055	WBGene00173790	NA	NA	NA	NA
F57C7.6	21ur-15079	WBGene00166577	NA	NA	NA	NA
Y57G11B.88	21ur-1509	WBGene00050161	NA	NA	NA	NA
T24H10.10	21ur-15099	WBGene00168488	NA	NA	NA	NA
T24A6.22	21ur-15101	WBGene00173848	NA	NA	NA	NA
R13H7.13	21ur-15140	WBGene00170652	NA	NA	NA	NA
F16H9.3	21ur-15144	WBGene00167909	NA	NA	NA	NA
C43G2.11	21ur-15262	WBGene00169448	NA	NA	NA	NA
Y57G11C.627	21ur-15267	WBGene00167050	NA	NA	NA	NA
F42A9.10	21ur-15295	WBGene00169295	NA	NA	NA	NA
E03D2.7	21ur-15336	WBGene00172257	NA	NA	NA	NA
AC7.51	21ur-15344	WBGene00171386	NA	NA	NA	NA
R05H5.9	21ur-15355	WBGene00168785	NA	NA	NA	NA
R02F11.5	21ur-15363	WBGene00172207	NA	NA	NA	NA
Y45F10D.119	21ur-15366	WBGene00172976	NA	NA	NA	NA
C04F12.13	21ur-15375	WBGene00168902	NA	NA	NA	NA
F11E6.16	21ur-15405	WBGene00171909	NA	NA	NA	NA
Y4C6B.72	21ur-15457	WBGene00171733	NA	NA	NA	NA
F13G11.91	21ur-15486	WBGene00168772	NA	NA	NA	NA
Y105C5A.351	21ur-1549	WBGene00049014	NA	NA	NA	NA
F57E7.7	21ur-15494	WBGene00165988	NA	NA	NA	NA
F20D12.9	21ur-15510	WBGene00167282	NA	NA	NA	NA
DH11.6	21ur-15545	WBGene00167440	NA	NA	NA	NA
F59C12.5	21ur-15586	WBGene00173884	NA	NA	NA	NA
Y105C5B.110	21ur-1570	WBGene00046371	NA	NA	NA	NA
Y73F8A.415	21ur-1574	WBGene00049956	NA	NA	NA	NA
Y51H4A.363	21ur-1630	WBGene00050240	NA	NA	NA	NA
Y57G11C.276	21ur-1638	WBGene00048369	NA	NA	NA	NA
C08F11.21	21ur-164	WBGene00045961	NA	NA	NA	NA
F26D12.7	21ur-1663	WBGene00046590	NA	NA	NA	NA
T23G4.9	21ur-1674	WBGene00045885	NA	NA	NA	NA
Y105C5A.167	21ur-1682	WBGene00046973	NA	NA	NA	NA
C24D10.22	21ur-1700	WBGene00050761	NA	NA	NA	NA
Y51H4A.243	21ur-1760	WBGene00048611	NA	NA	NA	NA
Y105C5B.559	21ur-177	WBGene00050458	NA	NA	NA	NA
Y105C5A.82	21ur-1790	WBGene00045985	NA	NA	NA	NA
H08M01.20	21ur-1810	WBGene00047268	NA	NA	NA	NA
Y51H4A.231	21ur-1877	WBGene00048388	NA	NA	NA	NA
Y57G11B.21	21ur-1918	WBGene00046074	NA	NA	NA	NA
B0513.40	21ur-1921	WBGene00050381	NA	NA	NA	NA
Y105C5B.221	21ur-1927	WBGene00047371	NA	NA	NA	NA
Y9C9A.31	21ur-1931	WBGene00048239	NA	NA	NA	NA
C45E5.15	21ur-1991	WBGene00048376	NA	NA	NA	NA
Y57G11C.88	21ur-2007	WBGene00046027	NA	NA	NA	NA
T23G4.37	21ur-2051	WBGene00049047	NA	NA	NA	NA
Y51H4A.267	21ur-209	WBGene00048971	NA	NA	NA	NA
T23G4.20	21ur-2099	WBGene00047552	NA	NA	NA	NA
Y73F8A.457	21ur-2124	WBGene00050397	NA	NA	NA	NA
Y105C5A.482	21ur-2127	WBGene00050515	NA	NA	NA	NA
F38C2.30	21ur-2165	WBGene00048214	NA	NA	NA	NA
Y57G11C.339	21ur-2223	WBGene00049073	NA	NA	NA	NA
Y41E3.112	21ur-2226	WBGene00047937	NA	NA	NA	NA
F55B11.27	21ur-2270	WBGene00047249	NA	NA	NA	NA
Y64G10A.147	21ur-2314	WBGene00050226	NA	NA	NA	NA
Y57G11C.118	21ur-234	WBGene00046456	NA	NA	NA	NA
K01G12.5	21ur-2358	WBGene00047008	NA	NA	NA	NA
Y105C5B.481	21ur-2384	WBGene00049697	NA	NA	NA	NA
Y45F10D.30	21ur-2390	WBGene00047151	NA	NA	NA	NA
Y51H4A.308	21ur-2394	WBGene00049516	NA	NA	NA	NA
Y73B6BL.71	21ur-2430	WBGene00048899	NA	NA	NA	NA
Y67A10A.30	21ur-2556	WBGene00046026	NA	NA	NA	NA
Y57G11C.232	21ur-2599	WBGene00047805	NA	NA	NA	NA
Y105C5B.208	21ur-2622	WBGene00047244	NA	NA	NA	NA
Y73B6BL.60	21ur-267	WBGene00047209	NA	NA	NA	NA
B0273.30	21ur-2735	WBGene00049511	NA	NA	NA	NA
C47A4.45	21ur-2749	WBGene00048320	NA	NA	NA	NA
Y57G11C.349	21ur-2765	WBGene00049218	NA	NA	NA	NA
Y4C6B.10	21ur-2888	WBGene00046441	NA	NA	NA	NA
Y51H4A.228	21ur-2900	WBGene00048306	NA	NA	NA	NA
Y57G11C.310	21ur-2948	WBGene00048783	NA	NA	NA	NA
Y41E3.51	21ur-2955	WBGene00046343	NA	NA	NA	NA
B0513.27	21ur-296	WBGene00048349	NA	NA	NA	NA
Y105C5B.270	21ur-2985	WBGene00047828	NA	NA	NA	NA
Y51H4A.374	21ur-3024	WBGene00050349	NA	NA	NA	NA
B0350.13	21ur-3043	WBGene00047225	NA	NA	NA	NA
F26D12.24	21ur-3065	WBGene00049353	NA	NA	NA	NA
Y51H4A.134	21ur-3073	WBGene00047106	NA	NA	NA	NA
C45E5.9	21ur-3089	WBGene00046533	NA	NA	NA	NA
H08M01.41	21ur-3098	WBGene00049068	NA	NA	NA	NA
Y116A8A.16	21ur-3106	WBGene00045796	NA	NA	NA	NA
Y37A1B.102	21ur-3151	WBGene00048610	NA	NA	NA	NA
Y64G10A.164	21ur-317	WBGene00050841	NA	NA	NA	NA
Y105C5A.84	21ur-3185	WBGene00046020	NA	NA	NA	NA
Y73B6BL.72	21ur-3194	WBGene00048940	NA	NA	NA	NA
C06E7.37	21ur-321	WBGene00049954	NA	NA	NA	NA
Y73F8A.398	21ur-323	WBGene00049796	NA	NA	NA	NA
Y57G11C.136	21ur-3254	WBGene00046714	NA	NA	NA	NA
Y57G11C.496	21ur-3263	WBGene00050859	NA	NA	NA	NA
Y51H4A.106	21ur-328	WBGene00046698	NA	NA	NA	NA
T23G4.14	21ur-3314	WBGene00046350	NA	NA	NA	NA
T23G4.44	21ur-3315	WBGene00049769	NA	NA	NA	NA
Y51H4A.175	21ur-3317	WBGene00047618	NA	NA	NA	NA
Y105C5A.283	21ur-3324	WBGene00048363	NA	NA	NA	NA
Y105C5A.294	21ur-3380	WBGene00048441	NA	NA	NA	NA
Y105C5B.112	21ur-3397	WBGene00046375	NA	NA	NA	NA
C02B10.23	21ur-3444	WBGene00049272	NA	NA	NA	NA
Y7A9D.12	21ur-3457	WBGene00047119	NA	NA	NA	NA
F13G11.30	21ur-3495	WBGene00048103	NA	NA	NA	NA
Y64G10A.19	21ur-3513	WBGene00045637	NA	NA	NA	NA
B0513.32	21ur-3538	WBGene00049202	NA	NA	NA	NA
Y57G11C.157	21ur-358	WBGene00046924	NA	NA	NA	NA
Y4C6B.22	21ur-3603	WBGene00049979	NA	NA	NA	NA
T06A10.7	21ur-3621	WBGene00045654	NA	NA	NA	NA
Y73F8A.213	21ur-367	WBGene00047641	NA	NA	NA	NA
Y73F8A.195	21ur-3672	WBGene00047399	NA	NA	NA	NA
Y45F10D.20	21ur-3781	WBGene00045897	NA	NA	NA	NA
F26D10.15	21ur-3861	WBGene00047727	NA	NA	NA	NA
Y64G10A.32	21ur-391	WBGene00046066	NA	NA	NA	NA
Y105C5B.48	21ur-3918	WBGene00045734	NA	NA	NA	NA
T23G4.6	21ur-3987	WBGene00045529	NA	NA	NA	NA
Y105C5A.269	21ur-4018	WBGene00048215	NA	NA	NA	NA
Y57G11C.177	21ur-4043	WBGene00047104	NA	NA	NA	NA
C47A4.51	21ur-4072	WBGene00049043	NA	NA	NA	NA
C39H7.15	21ur-4114	WBGene00046261	NA	NA	NA	NA
AC7.11	21ur-4118	WBGene00047233	NA	NA	NA	NA
Y73F8A.404	21ur-4128	WBGene00049864	NA	NA	NA	NA
Y105C5A.203	21ur-4145	WBGene00047361	NA	NA	NA	NA
Y51H4A.268	21ur-4154	WBGene00048993	NA	NA	NA	NA
Y105C5A.281	21ur-4179	WBGene00048350	NA	NA	NA	NA
Y57G11A.34	21ur-4191	WBGene00047369	NA	NA	NA	NA
C46G7.23	21ur-4234	WBGene00047757	NA	NA	NA	NA
Y67A10A.116	21ur-424	WBGene00049667	NA	NA	NA	NA
W03F8.32	21ur-4263	WBGene00050417	NA	NA	NA	NA
Y57G11C.111	21ur-4268	WBGene00046354	NA	NA	NA	NA
C31H1.27	21ur-4276	WBGene00048054	NA	NA	NA	NA
Y105C5B.124	21ur-4310	WBGene00046502	NA	NA	NA	NA
Y37A1B.147	21ur-4354	WBGene00050567	NA	NA	NA	NA
Y64G10A.115	21ur-4379	WBGene00049165	NA	NA	NA	NA
Y105C5A.317	21ur-4385	WBGene00048676	NA	NA	NA	NA
W03F8.20	21ur-4445	WBGene00047312	NA	NA	NA	NA
Y105C5B.403	21ur-4490	WBGene00049036	NA	NA	NA	NA
Y105C5B.595	21ur-450	WBGene00050732	NA	NA	NA	NA
M199.37	21ur-4503	WBGene00048709	NA	NA	NA	NA
Y51H4A.396	21ur-4516	WBGene00050807	NA	NA	NA	NA
Y57G11A.75	21ur-4573	WBGene00049899	NA	NA	NA	NA
C11D2.16	21ur-4577	WBGene00046257	NA	NA	NA	NA
C46G7.27	21ur-4584	WBGene00048712	NA	NA	NA	NA
Y64G10A.155	21ur-4642	WBGene00050532	NA	NA	NA	NA
Y51H4A.365	21ur-4666	WBGene00050263	NA	NA	NA	NA
Y4C6B.8	21ur-4673	WBGene00045592	NA	NA	NA	NA
Y64G10A.36	21ur-4694	WBGene00046287	NA	NA	NA	NA
Y67A10A.48	21ur-47	WBGene00046783	NA	NA	NA	NA
Y105C5B.407	21ur-4800	WBGene00049058	NA	NA	NA	NA
Y105C5B.382	21ur-4820	WBGene00048791	NA	NA	NA	NA
Y73F8A.410	21ur-4841	WBGene00049922	NA	NA	NA	NA
Y41E3.45	21ur-4845	WBGene00046233	NA	NA	NA	NA
Y73F8A.122	21ur-4852	WBGene00046472	NA	NA	NA	NA
Y4C6B.26	21ur-4904	WBGene00050310	NA	NA	NA	NA
Y51H4A.246	21ur-4934	WBGene00048657	NA	NA	NA	NA
W03F8.17	21ur-4955	WBGene00046404	NA	NA	NA	NA
Y51H4A.329	21ur-4983	WBGene00049890	NA	NA	NA	NA
R05A10.34	21ur-4988	WBGene00048108	NA	NA	NA	NA
Y41E3.76	21ur-5008	WBGene00047124	NA	NA	NA	NA
T23G4.46	21ur-5024	WBGene00050120	NA	NA	NA	NA
C31H1.20	21ur-5028	WBGene00047084	NA	NA	NA	NA
H08M01.6	21ur-5063	WBGene00045739	NA	NA	NA	NA
F13G11.18	21ur-5138	WBGene00046694	NA	NA	NA	NA
Y57G11A.57	21ur-5142	WBGene00048790	NA	NA	NA	NA
Y105C5B.178	21ur-5144	WBGene00046993	NA	NA	NA	NA
Y116A8C.151	21ur-5151	WBGene00049556	NA	NA	NA	NA
R05A10.32	21ur-5169	WBGene00047865	NA	NA	NA	NA
H16O14.6	21ur-5175	WBGene00046530	NA	NA	NA	NA
Y105C5B.279	21ur-5284	WBGene00047901	NA	NA	NA	NA
Y51H4A.379	21ur-5285	WBGene00050590	NA	NA	NA	NA
H08M01.8	21ur-529	WBGene00045940	NA	NA	NA	NA
Y57G11C.258	21ur-5308	WBGene00048083	NA	NA	NA	NA
Y64G10A.144	21ur-5321	WBGene00050148	NA	NA	NA	NA
Y57G11A.47	21ur-5327	WBGene00048238	NA	NA	NA	NA
C39H7.10	21ur-5354	WBGene00045619	NA	NA	NA	NA
Y73F8A.120	21ur-5355	WBGene00046452	NA	NA	NA	NA
B0513.30	21ur-5407	WBGene00049071	NA	NA	NA	NA
C47A4.46	21ur-5418	WBGene00048458	NA	NA	NA	NA
H12I19.14	21ur-544	WBGene00045979	NA	NA	NA	NA
Y73F8A.386	21ur-5451	WBGene00049572	NA	NA	NA	NA
Y51H4A.750	21ur-5465	WBGene00171682	NA	NA	NA	NA
M199.85	21ur-5631	WBGene00168043	NA	NA	NA	NA
C02B10.47	21ur-5726	WBGene00169496	NA	NA	NA	NA
Y73B6BL.217	21ur-5754	WBGene00172565	NA	NA	NA	NA
Y64G10A.171	21ur-5773	WBGene00165341	NA	NA	NA	NA
F13G11.139	21ur-5782	WBGene00174484	NA	NA	NA	NA
Y57G11B.213	21ur-5789	WBGene00174206	NA	NA	NA	NA
Y64G10A.305	21ur-5804	WBGene00172431	NA	NA	NA	NA
Y73F8A.871	21ur-5817	WBGene00170833	NA	NA	NA	NA
Y73F8A.737	21ur-5930	WBGene00168720	NA	NA	NA	NA
F01D4.11	21ur-5938	WBGene00168642	NA	NA	NA	NA
H32C10.93	21ur-5956	WBGene00174821	NA	NA	NA	NA
Y43D4A.110	21ur-6010	WBGene00169057	NA	NA	NA	NA
Y105C5A.803	21ur-6066	WBGene00168917	NA	NA	NA	NA
Y57G11C.739	21ur-6073	WBGene00168776	NA	NA	NA	NA
Y105C5B.655	21ur-6080	WBGene00165610	NA	NA	NA	NA
Y105C5B.1153	21ur-6127	WBGene00171807	NA	NA	NA	NA
Y40H7A.214	21ur-6183	WBGene00168612	NA	NA	NA	NA
R05A10.70	21ur-6193	WBGene00166609	NA	NA	NA	NA
Y116A8A.95	21ur-6215	WBGene00169425	NA	NA	NA	NA
Y10G11A.36	21ur-6234	WBGene00166333	NA	NA	NA	NA
F55B11.119	21ur-6253	WBGene00173065	NA	NA	NA	NA
F52G2.5	21ur-6256	WBGene00166068	NA	NA	NA	NA
C06E4.12	21ur-6266	WBGene00170878	NA	NA	NA	NA
Y57G11C.648	21ur-6278	WBGene00167345	NA	NA	NA	NA
C33A12.25	21ur-6290	WBGene00169832	NA	NA	NA	NA
Y116A8C.300	21ur-6297	WBGene00168748	NA	NA	NA	NA
F38C2.95	21ur-6333	WBGene00174768	NA	NA	NA	NA
Y37A1B.318	21ur-6354	WBGene00174270	NA	NA	NA	NA
C27H2.26	21ur-639	WBGene00047405	NA	NA	NA	NA
Y105C5A.1054	21ur-6439	WBGene00172107	NA	NA	NA	NA
C45E5.40	21ur-6494	WBGene00171052	NA	NA	NA	NA
C43G2.6	21ur-6496	WBGene00166100	NA	NA	NA	NA
C39H7.32	21ur-6506	WBGene00167695	NA	NA	NA	NA
Y37A1B.179	21ur-6539	WBGene00166596	NA	NA	NA	NA
Y4C6B.85	21ur-6552	WBGene00173709	NA	NA	NA	NA
H32C10.77	21ur-6565	WBGene00172453	NA	NA	NA	NA
C01G5.17	21ur-6629	WBGene00168673	NA	NA	NA	NA
Y45F10D.73	21ur-6631	WBGene00166922	NA	NA	NA	NA
H34C03.10	21ur-6677	WBGene00168305	NA	NA	NA	NA
H16O14.22	21ur-6686	WBGene00165268	NA	NA	NA	NA
Y51H4A.343	21ur-669	WBGene00050057	NA	NA	NA	NA
H10D12.5	21ur-6704	WBGene00166258	NA	NA	NA	NA
K08B4.38	21ur-6722	WBGene00174237	NA	NA	NA	NA
Y105C5B.1065	21ur-6771	WBGene00170666	NA	NA	NA	NA
H08M01.92	21ur-6778	WBGene00171255	NA	NA	NA	NA
Y105C5A.643	21ur-6796	WBGene00166860	NA	NA	NA	NA
C31H1.88	21ur-6835	WBGene00173926	NA	NA	NA	NA
Y105C5B.1201	21ur-6839	WBGene00172496	NA	NA	NA	NA
Y73F8A.948	21ur-6846	WBGene00171987	NA	NA	NA	NA
Y67A10A.123	21ur-688	WBGene00050075	NA	NA	NA	NA
Y57G11C.520	21ur-6952	WBGene00165348	NA	NA	NA	NA
Y4C6A.41	21ur-7011	WBGene00169520	NA	NA	NA	NA
Y37A1B.160	21ur-7045	WBGene00165580	NA	NA	NA	NA
Y51H4A.923	21ur-7050	WBGene00174811	NA	NA	NA	NA
B0513.80	21ur-7060	WBGene00173135	NA	NA	NA	NA
C43G2.14	21ur-7086	WBGene00169664	NA	NA	NA	NA
Y67A10A.24	21ur-710	WBGene00045775	NA	NA	NA	NA
Y64G10A.349	21ur-7108	WBGene00174854	NA	NA	NA	NA
Y57G11C.921	21ur-7143	WBGene00171659	NA	NA	NA	NA
H08M01.104	21ur-7151	WBGene00173438	NA	NA	NA	NA
R05A10.82	21ur-7161	WBGene00168753	NA	NA	NA	NA
Y41E3.413	21ur-7257	WBGene00172252	NA	NA	NA	NA
T27B7.8	21ur-7342	WBGene00174687	NA	NA	NA	NA
Y4C6B.83	21ur-7346	WBGene00173292	NA	NA	NA	NA
T27E7.26	21ur-738	WBGene00048387	NA	NA	NA	NA
Y73F8A.795	21ur-7385	WBGene00169650	NA	NA	NA	NA
Y105C5A.1149	21ur-7423	WBGene00173315	NA	NA	NA	NA
Y51H4A.690	21ur-7431	WBGene00170553	NA	NA	NA	NA
F44E8.28	21ur-7437	WBGene00169977	NA	NA	NA	NA
Y67A10A.175	21ur-7476	WBGene00166403	NA	NA	NA	NA
T06A10.82	21ur-7511	WBGene00171230	NA	NA	NA	NA
LLC1.114	21ur-7516	WBGene00174635	NA	NA	NA	NA
Y41E3.375	21ur-7518	WBGene00170962	NA	NA	NA	NA
C05B10.3	21ur-7541	WBGene00165147	NA	NA	NA	NA
Y17G9A.71	21ur-7555	WBGene00172114	NA	NA	NA	NA
Y116A8A.81	21ur-7557	WBGene00167610	NA	NA	NA	NA
AC7.27	21ur-7559	WBGene00166862	NA	NA	NA	NA
B0513.68	21ur-7585	WBGene00170131	NA	NA	NA	NA
Y51H4A.828	21ur-7589	WBGene00172951	NA	NA	NA	NA
R11E3.13	21ur-7600	WBGene00172271	NA	NA	NA	NA
Y57G11C.757	21ur-7635	WBGene00169035	NA	NA	NA	NA
C47A4.94	21ur-7667	WBGene00167853	NA	NA	NA	NA
B0513.43	21ur-7671	WBGene00165100	NA	NA	NA	NA
Y105C5A.774	21ur-7705	WBGene00168647	NA	NA	NA	NA
C31H1.89	21ur-7729	WBGene00174047	NA	NA	NA	NA
Y41E3.433	21ur-7748	WBGene00173566	NA	NA	NA	NA
Y51H4A.724	21ur-7775	WBGene00171233	NA	NA	NA	NA
C49A9.16	21ur-7822	WBGene00166033	NA	NA	NA	NA
C17H12.26	21ur-7848	WBGene00171754	NA	NA	NA	NA
Y4C6B.54	21ur-7864	WBGene00168004	NA	NA	NA	NA
Y57G11A.163	21ur-7869	WBGene00169905	NA	NA	NA	NA
Y57G11B.155	21ur-7895	WBGene00168618	NA	NA	NA	NA
Y41E3.309	21ur-7968	WBGene00168285	NA	NA	NA	NA
C52D10.112	21ur-7977	WBGene00172941	NA	NA	NA	NA
Y64G10A.342	21ur-8006	WBGene00174349	NA	NA	NA	NA
Y105C5B.1248	21ur-8024	WBGene00173017	NA	NA	NA	NA
Y73B6BL.94	21ur-8032	WBGene00165632	NA	NA	NA	NA
F41H10.16	21ur-8039	WBGene00166786	NA	NA	NA	NA
Y116A8C.62	21ur-804	WBGene00045974	NA	NA	NA	NA
C47A4.90	21ur-8049	WBGene00167139	NA	NA	NA	NA
M03D4.32	21ur-8066	WBGene00165707	NA	NA	NA	NA
Y73B6BL.221	21ur-8069	WBGene00172757	NA	NA	NA	NA
F55B11.120	21ur-8071	WBGene00173191	NA	NA	NA	NA
LLC1.112	21ur-8112	WBGene00174441	NA	NA	NA	NA
F13G11.130	21ur-8115	WBGene00173394	NA	NA	NA	NA
Y73F8A.951	21ur-8137	WBGene00172023	NA	NA	NA	NA
W03F8.60	21ur-8163	WBGene00171941	NA	NA	NA	NA
Y45F10D.86	21ur-8189	WBGene00169094	NA	NA	NA	NA
Y105C5B.765	21ur-8192	WBGene00167147	NA	NA	NA	NA
Y57G11C.761	21ur-8196	WBGene00169105	NA	NA	NA	NA
C49A9.11	21ur-820	WBGene00047672	NA	NA	NA	NA
Y57G11C.795	21ur-8231	WBGene00169747	NA	NA	NA	NA
Y49F6C.10	21ur-8285	WBGene00170626	-0.0188614	3.55059	0.945076	1
Y57G11C.827	21ur-8332	WBGene00170189	NA	NA	NA	NA
Y64G10A.285	21ur-8344	WBGene00171273	NA	NA	NA	NA
H06H21.23	21ur-8392	WBGene00168841	NA	NA	NA	NA
C31H1.85	21ur-8421	WBGene00173577	NA	NA	NA	NA
Y64G10A.290	21ur-8469	WBGene00171644	NA	NA	NA	NA
C31H1.77	21ur-8491	WBGene00172174	NA	NA	NA	NA
Y57G11A.100	21ur-8523	WBGene00166130	NA	NA	NA	NA
Y57G11C.720	21ur-8530	WBGene00168409	NA	NA	NA	NA
F23B2.25	21ur-8552	WBGene00167159	NA	NA	NA	NA
T23G4.61	21ur-8569	WBGene00165749	NA	NA	NA	NA
T23G4.80	21ur-8585	WBGene00168183	NA	NA	NA	NA
Y4C6B.59	21ur-8597	WBGene00169276	NA	NA	NA	NA
Y116A8C.268	21ur-8598	WBGene00167479	NA	NA	NA	NA
Y41E3.378	21ur-8612	WBGene00171166	NA	NA	NA	NA
Y64G10A.127	21ur-863	WBGene00049680	NA	NA	NA	NA
B0350.63	21ur-8655	WBGene00174208	NA	NA	NA	NA
C17H12.18	21ur-8662	WBGene00166811	NA	NA	NA	NA
Y116A8B.84	21ur-8666	WBGene00173308	NA	NA	NA	NA
Y41E3.239	21ur-8695	WBGene00165706	NA	NA	NA	NA
Y45F10D.91	21ur-8715	WBGene00169370	NA	NA	NA	NA
C06E7.79	21ur-8734	WBGene00173518	NA	NA	NA	NA
Y57G11C.898	21ur-8765	WBGene00171264	NA	NA	NA	NA
M03D4.39	21ur-8804	WBGene00167680	NA	NA	NA	NA
Y41E3.439	21ur-8805	WBGene00173760	NA	NA	NA	NA
C01G5.23	21ur-8881	WBGene00173110	NA	NA	NA	NA
F13G11.120	21ur-8883	WBGene00172189	NA	NA	NA	NA
Y105C5A.831	21ur-8936	WBGene00169249	NA	NA	NA	NA
Y41E3.397	21ur-8991	WBGene00171707	NA	NA	NA	NA
Y42H9B.4	21ur-9006	WBGene00169592	NA	NA	NA	NA
Y57G11B.180	21ur-9028	WBGene00170364	NA	NA	NA	NA
T13A10.54	21ur-9047	WBGene00173556	NA	NA	NA	NA
C39H7.34	21ur-9133	WBGene00167837	NA	NA	NA	NA
Y73B6BL.225	21ur-9136	WBGene00172866	NA	NA	NA	NA
F23B2.26	21ur-9145	WBGene00167260	NA	NA	NA	NA
Y9C9A.78	21ur-9158	WBGene00170298	NA	NA	NA	NA
Y105C5B.855	21ur-9168	WBGene00168176	NA	NA	NA	NA
C06G3.13	21ur-9174	WBGene00167685	NA	NA	NA	NA
Y40H7A.183	21ur-9249	WBGene00167038	NA	NA	NA	NA
Y57G11C.546	21ur-9264	WBGene00165803	NA	NA	NA	NA
Y105C5B.1274	21ur-9310	WBGene00173375	NA	NA	NA	NA
F41H10.17	21ur-9334	WBGene00167114	NA	NA	NA	NA
F13G11.116	21ur-9380	WBGene00171823	NA	NA	NA	NA
T13A10.29	21ur-9404	WBGene00168600	NA	NA	NA	NA
C31H1.37	21ur-9408	WBGene00165679	NA	NA	NA	NA
Y57G11C.271	21ur-941	WBGene00048291	NA	NA	NA	NA
Y105C5A.1260	21ur-9425	WBGene00174900	NA	NA	NA	NA
R13H7.18	21ur-9438	WBGene00173777	NA	NA	NA	NA
H16O14.35	21ur-9440	WBGene00168416	NA	NA	NA	NA
Y105C5A.868	21ur-9463	WBGene00169699	NA	NA	NA	NA
T13F2.15	21ur-9485	WBGene00168622	NA	NA	NA	NA
Y73F8A.1077	21ur-9521	WBGene00173837	NA	NA	NA	NA
Y73F8A.847	21ur-9523	WBGene00170521	NA	NA	NA	NA
T28H11.27	21ur-9528	WBGene00172614	NA	NA	NA	NA
B0513.81	21ur-9543	WBGene00173305	NA	NA	NA	NA
C31H1.76	21ur-9601	WBGene00172154	NA	NA	NA	NA
AC7.83	21ur-9616	WBGene00174933	NA	NA	NA	NA
Y67A10A.273	21ur-9650	WBGene00171568	NA	NA	NA	NA
Y57G11A.148	21ur-9655	WBGene00169318	NA	NA	NA	NA
B0513.82	21ur-9656	WBGene00173331	NA	NA	NA	NA
Y57G11A.87	21ur-9701	WBGene00165329	NA	NA	NA	NA
R11E3.12	21ur-9743	WBGene00169034	NA	NA	NA	NA
Y37A1B.75	21ur-975	WBGene00047764	NA	NA	NA	NA
F27C8.7	21ur-9836	WBGene00165332	NA	NA	NA	NA
F16B4.13	21ur-9839	WBGene00167824	NA	NA	NA	NA
R13H7.4	21ur-9844	WBGene00166502	NA	NA	NA	NA
H06H21.13	21ur-9902	WBGene00165431	NA	NA	NA	NA
F27C8.9	21ur-9918	WBGene00171002	NA	NA	NA	NA
Y105C5A.1120	21ur-9923	WBGene00172921	NA	NA	NA	NA
Y57G11C.1030	21ur-9961	WBGene00173423	NA	NA	NA	NA
D2096.3	aagr-1	WBGene00017071	-0.486712	6.1247	0.0161837	0.160251
R05F9.12	aagr-2	WBGene00019895	-0.272548	7.98719	0.136667	0.638258
F40F9.6	aagr-3	WBGene00009583	-0.148484	8.1869	0.335243	0.921063
F52D1.1	aagr-4	WBGene00018682	0.779373	2.7361	0.0107245	0.118158
PAR2.3	aak-1	WBGene00019801	-0.171017	4.80144	0.483956	1	aak-1 encodes one of two C. elegans homologs of the catalytic alpha subunit of AMP-activated protein kinases (AMPKs); aak-1 activity is required, in parallel with aak-2 and downstream of daf-2, daf-7, and par-4, for negative regulation of germline proliferation during dauer development.
T01C8.1	aak-2	WBGene00020142	-0.495972	7.19785	0.00212139	0.0340884	aak-2 encodes one of two C. elegans homologs of the catalytic alpha subunit of AMP-activated protein kinases (AMPKs); in C. elegans, aak-2 functions downstream of environmental stressors, energy level signals (AMP:ATP ratio), and daf-2-mediated insulin signaling to positively regulate adult lifespan; in regulating lifespan, aak-2 likely acts in parallel with daf-16/FOXO; aak-2 activity is also re…
F55F3.1	aakb-1	WBGene00010115	-0.191204	5.85779	0.250797	0.834464	aakb-1 encodes one of two C. elegans AMP kinase (AMPK) beta regulatory subunits.
Y47D3A.15	aakb-2	WBGene00012928	-0.119635	5.12581	0.643206	1	aakb-2 encodes one of two C. elegans AMP kinase (AMPK) beta regulatory subunits.
Y111B2A.8	aakg-1	WBGene00013732	-0.554326	6.47698	0.02878	0.242365	aakg-1 is orthologous to the human gene AMP-ACTIVATED PROTEIN KINASE GAMMA SUBUNIT (PRKAG2; OMIM:602743), which when mutated leads to disease; aakg-1 encodes one of five C. elegans AMP kinase (AMPK) gamma regulatory subunits.
T20F7.6	aakg-2	WBGene00020633	0.0959143	5.10452	0.528575	1	aakg-2 encodes one of five C. elegans AMP kinase (AMPK) gamma regulatory subunits.
Y41G9A.3	aakg-3	WBGene00021527	0.00993307	4.413	0.952303	1	aakg-3 encodes one of five C. elegans AMP kinase (AMPK) gamma regulatory subunits.
T01B6.3	aakg-4	WBGene00020135	-1.77127	6.20555	3.90075e-14	1.47731e-11	aakg-4 encodes one of five C. elegans AMP kinase (AMPK) gamma regulatory subunits.
R53.7	aakg-5	WBGene00011276	-0.384854	6.26231	0.0178172	0.171569	aakg-5 encodes one of five C. elegans AMP kinase (AMPK) gamma regulatory subunits.
Y110A7A.10	aap-1	WBGene00000001	-0.116505	5.22678	0.551127	1	aap-1 encodes the C. elegans ortholog of the phosphoinositide 3-kinase (PI3K) p50/p55 adaptor/regulatory subunit; AAP-1 negatively regulates lifespan and dauer development, and likely functions as the sole adaptor subunit for the AGE-1/p110 PI3K catalytic subunit to which it binds in vitro; although AAP-1 potentiates insulin-like signaling, it is not absolutely required for insulin-like signaling…
W02B12.6	aars-1	WBGene00000196	-0.138163	5.02316	0.356768	0.938831	ars-1 encodes an alanyl tRNA synthetase; on the basis of similarity to S. cerevisiae ALA1p, ARS-1 is probably cytoplasmic.
F28H1.3	aars-2	WBGene00000197	0.00805517	7.28198	0.970653	1	aars-2 encodes a predicted cytoplasmic alanyl-tRNA synthetase (AlaRS), a class II aminoacyl-tRNA synthetase that catalyzes the attachment of alanine to its cognate tRNA and is thus required for protein biosynthesis; AARS-2 is essential for embryogenesis, and is required for fertility and a normal rate of postembryonic development; AARS-2 expression is likely ubiquitous and detected in hypodermis,…
F27C8.1	aat-1	WBGene00000002	-0.296945	4.76495	0.0770423	0.457852	aat-1 encodes an amino acid transporter catalytic subunit; when co-expressed in Xenopus oocytes with the ATG-2 glycoprotein subunit, AAT-1 is able to facilitate amino acid uptake and exchange, showing a relatively high affinity for small and some large neutral amino acids; in addition, AAT-1 is able to covalently associate with ATG-2 or ATG-1 to form heterodimers in the Xenopus expression system;…
F07C3.7	aat-2	WBGene00000003	0.59203	6.0255	0.0157213	0.156782	aat-2 encodes a predicted amino acid transporter catalytic subunit; when co-expressed in Xenopus oocytes with a glycoprotein subunit, however, AAT-2 is not able to induce amino acid uptake.
F52H2.2	aat-3	WBGene00000004	-0.221011	5.94992	0.140975	0.646873	aat-3 encodes an amino acid transporter catalytic subunit; when co-expressed in Xenopus oocytes with the ATG-2 glycoprotein subunit, AAT-3 is able to facilitate amino acid uptake and exchange, showing a relatively high affinity for small and some large neutral amino acids; in addition, AAT-3 is able to covalently associate with ATG-2 or ATG-1 to form heterodimers in the Xenopus expression system;…
T13A10.10	aat-4	WBGene00000005	1.4591	2.05518	0.000202175	0.00498992	aat-4 encodes a predicted amino acid transporter catalytic subunit; unlike catalytic subunits in other organisms, however, AAT-4 does not contain the highly conserved cysteine residue known to facilitate covalent interaction with a glycoprotein subunit, suggesting that AAT-4 does not require this residue for heterodimer formation or, alternatively, does not require the glycoprotein subunit for fu…
C55C2.5	aat-5	WBGene00000006	0.153248	7.22623	0.357464	0.938831	aat-5 encodes a predicted amino acid transporter catalytic subunit; unlike catalytic subunits in other organisms, however, AAT-5 does not contain the highly conserved cysteine residue known to facilitate covalent interaction with a glycoprotein subunit, suggesting that AAT-5 does not require this residue for heterodimer formation or alternatively, does not require the glycoprotein subunit for fun…
T11F9.4	aat-6	WBGene00000007	0.998127	4.04342	0.000219013	0.00534744	aat-6 encodes a predicted amino acid transporter catalytic subunit; unlike catalytic subunits in other organisms, however, AAT-6 does not contain the highly conserved cysteine residue known to facilitate covalent interaction with a glycoprotein subunit, suggesting that AAT-6 does not require this residue for heterodimer formation or alternatively, does not require the glycoprotein subunit for fun…
F54D12.3	aat-7	WBGene00000008	0.375872	1.37197	0.435828	0.984075	aat-7 encodes a predicted amino acid transporter catalytic subunit; unlike catalytic subunits in other organisms, however, AAT-7 does not contain the highly conserved cysteine residue known to facilitate covalent interaction with a glycoprotein subunit, suggesting that AAT-7 does not require this residue for heterodimer formation or alternatively, does not require the glycoprotein subunit for fun…
F28F9.4	aat-8	WBGene00000009	0.378736	2.48297	0.242479	0.82412	aat-8 encodes a predicted amino acid transporter catalytic subunit; unlike catalytic subunits in other organisms, however, AAT-8 does not contain the highly conserved cysteine residue known to facilitate covalent interaction with a glycoprotein subunit, suggesting that AAT-8 does not require this residue for heterodimer formation or alternatively, does not require the glycoprotein subunit for fun…
Y53H1C.1	aat-9	WBGene00000010	-0.0450381	4.00917	0.773202	1	aat-9 encodes an amino acid transporter catalytic subunit; AAT-9 lacks the conserved cysteine residue proposed to be essential for association with a glycoprotein subunit, and when expressed alone in Xenopus ooctyes, AAT-9 can localize to the cell surface and function as an aromatic amino acid exchanger that displays substrate-activated anion conductance; nevertheless, AAT-9 activity is enhanced …
Y39E4B.1	abce-1	WBGene00012714	0.137746	7.10905	0.410008	0.974034
F18E2.2	abcf-1	WBGene00006512	0.106372	6.18527	0.54118	1
T27E9.7	abcf-2	WBGene00012097	-0.305095	9.16316	0.079949	0.466711
F42A10.1	abcf-3	WBGene00018339	-0.170513	6.84626	0.44862	0.988631	abcf-3 encodes a protein with sequence similarity to AAA ATPases that is the C. elegans ortholog of the S. cerevisiae ribosome-association protein Gcn20p; ABCF-3, along with GCN-1, is required for maintaining the steady-state levels of phosphorylated eIF2alpha, and thus for the translational control of a number of mRNAs; ABCF-3 activity is required, in parallel to, or downstream of, the canonical…
C56E6.5	abch-1	WBGene00016973	0.425529	0.384549	0.392197	0.963567
C56E6.1	abcx-1	WBGene00006522	0.124264	1.95128	0.66223	1
C50F2.9	abf-1	WBGene00000012	NA	NA	NA	NA	The abf-1 gene encodes a homolog of the antibacterial factor ASABF from Ascaris suum; it is closely related to abf-2.
C50F2.10	abf-2	WBGene00000013	-1.24858	3.02498	0.000502598	0.0107438	abf-2 encodes an antimicrobial peptide homologous to Ascaris suum antibacterial factor ASABF, and closely related to ABF-1; recombinant ABF-2 displays strong microbicidal activity against Gram-negative and Gram-positive bacteria, as well as fungi; on account of ABF-2's antimicrobial activity, sequence similarity, and expression in the pharyngeal marginal zone, ABF-2 is thought to mediate an antim…
F54B8.5	abf-3	WBGene00000014	-0.612588	-0.650432	0.510831	1	abf-3 encodes a homolog of the antibacterial factor ASABF from Ascaris suum; ABF-3 may play a role in innate immunity, though at present the only evidence for its having an antimicrobial humoral function is its sequence similarity.
Y38H6C.22	abf-4	WBGene00000015	0.493275	0.573679	0.398349	0.966622	abf-4 encodes a homolog of the antibacterial factor ASABF from Ascaris suum; ABF-4 may play a role in innate immunity, though at present the only evidence for its having an antimicrobial humoral function is its sequence similarity.
T22H6.5	abf-5	WBGene00000016	-0.804414	5.35346	0.000380293	0.00855308	The abf-5 gene encodes a homolog of the antibacterial factor ASABF from Ascaris suum.
T22H6.7	abf-6	WBGene00000017	-1.46637	6.85347	9.8818e-13	2.77111e-10	abf-6 encodes a homolog of the antibacterial factor ASABF from Ascaris suum; ABF-6 may play a role in innate immunity, though at present the only evidence for its having an antimicrobial humoral function is its sequence similarity.
F32B4.6	abhd-11.1	WBGene00009316	0.135611	0.57103	0.87528	1
R05D7.4	abhd-11.2	WBGene00011029	-0.0372968	4.72875	0.836665	1
Y97E10AL.2	abhd-12	WBGene00022393	-0.206345	5.84727	0.190033	0.746425
Y55F3AM.10	abhd-14	WBGene00021927	0.243842	4.12236	0.143993	0.655864
Y60A3A.7	abhd-3.1	WBGene00013358	1.7867	6.46018	2.09681e-06	0.000105947
C44C1.5	abhd-3.2	WBGene00016644	1.16625	4.98678	0.00349606	0.0496822
C37H5.2	abhd-5.1	WBGene00016506	-0.483643	4.42553	0.0099281	0.111822
C37H5.3	abhd-5.2	WBGene00016507	0.294134	4.70787	0.152063	0.675492
B0336.6	abi-1	WBGene00015146	0.0800168	5.06628	0.588936	1	abi-1 encodes an Abl interactor orthologous to human SSH3BP1 (ABI1; OMIM:603050, mutated in acute myeloid leukemia), ABI-2 (OMIM:606442), and NESH (OMIM:606363); abi-1 is required for epidermal cell migrations during embryonic enclosure, proper migration of the excretory cell, distal tip cell, and mechanosensory and motoneurons, and apoptotic cell engulfment; ABI-1 physically interacts with the M…
M79.1	abl-1	WBGene00000018	-0.0217119	5.93726	0.90656	1	abl-1 encodes, by alternative splicing, three isoforms of a Src homology (SH) 2 and 3 domain-containing non-receptor tyrosine kinase orthologous to human ABL1 (OMIM:189980, mutated in chronic myeloid leukemia) and ABL2 (OMIM:164690); ABL-1 inhibits germline apoptosis induced by radiation or by natural aging, but it has no effect on apoptosis induced by starvation or by chemical mutagens (ethylnit…
C24F3.5	abt-1	WBGene00000019	0.247478	0.882311	0.748314	1	abt-1 encodes a predicted ATP-binding cassette (ABC) transporter that is a member of the ABCA subfamily of transport proteins; ABT-1 is predicted to function as a transmembrane protein that couples energy to transport of various molecules across membranes; abt-1 is required for efficient RNA interference in the germline.
F12B6.1	abt-2	WBGene00000020	-0.114418	7.07058	0.542212	1	abt-2 encodes a predicted ATP-binding cassette (ABC) transporter that is a member of the ABCA subfamily of transport proteins; ABT-2 is predicted to function as a transmembrane protein that couples energy to transport of various molecules across membranes.
Y39D8C.1	abt-4	WBGene00000022	0.248181	5.67655	0.241403	0.822986	abt-4 encodes a predicted ATP-binding cassette (ABC) transporter that is a member of the ABCA subfamily of transport proteins; ABT-4 is predicted to function as a transmembrane protein that couples energy to transport of various molecules across membranes, but as loss of abt-4 activity via RNAi results in no obvious defects, the precise role of abt-4 in C. elegans development and/or behavior is n…
Y53C10A.9	abt-5	WBGene00000023	0.134196	2.30796	0.726612	1	abt-5 encodes a predicted ATP-binding cassette (ABC) transporter that is a member of the ABCA subfamily of transport proteins; ABT-5 is predicted to function as a transmembrane protein that couples energy to transport of various molecules across membranes, but as loss of abt-5 activity via RNAi results in no obvious defects, the precise role of abt-5 in C. elegans development and/or behavior is n…
Y74C10AR.3	abtm-1	WBGene00022281	0.0577956	5.8964	0.759498	1	abtm-1 encodes a protein orthologous to the highly conserved ABCB7 protein and has the typical ABC superfamily structure with six transmembrane domains and an ATP binding domain; ABCB7 is involved in the transport of iron-sulphur clusters into the cytoplasm and thus in iron homeostasis; abtm-1 is an essential gene and knock-down of abtm-1 via RNA interference results in pleiotropic phenotypes tha…
F52B5.1	abts-1	WBGene00009920	-0.0147934	9.124	0.940375	1	abts-1 encodes a sodium-driven chloride-bicarbonate transporter; when expressed in Xenopus oocytes, ABTS-1 exhibits robust chloride transport, as well as chloride/bicarbonate exchange activity; abts-1 responds to arsenite in the environment with an increase in mRNA levels and is required for protection against toxicity of arsenite; abts-1 is involved in cholinergic signaling as abts-1 mutant worm…
F52D10.1	abts-2	WBGene00009929	-0.0602537	3.74182	0.74399	1	abts-2 encodes an anion transporter; when expressed in Xenopus oocytes, ABTS-2 does not exhibit detectable transport of chloride, sulfate, or oxolate anions; ABTS-2::GFP fusion proteins are expressed in the larval excretory cell and the adult ovaries, while an abts-2::gfp promoter fusion is seen in only one tail ganglion neuron; in intestinal cells, the ABTS-2::GFP fusion protein localizes to the…
F57F10.1	abts-3	WBGene00019018	0.0135026	6.88813	0.933769	1	abts-3 encodes an anion transporter; abts-3 promoter gfp fusions are expressed in neurons and hypodermal cells in a pattern coincident with abts-1.
R03E9.3	abts-4	WBGene00019844	-0.324761	6.4158	0.0556397	0.375978	abts-4 encodes an anion transporter; ABTS-4::GFP fusion proteins are expressed solely in the intestine, with highest levels seen in the most anterior and posterior gut cells and subcellular localization restricted to the basolateral membrane.
AC3.3	abu-1	WBGene00000024	0.318414	-0.302586	0.691917	1	abu-1 encodes a transmembrane protein with a predicted signal sequence, a glutamine/asparagine-rich domain and multiple cysteine-rich repeats (DUF139); abu-1 expression is induced by blockage of the endoplasmic reticulum unfolded protein response, and ABU-1 may help protect the organism from damage by improperly folded nascent protein; when expressed in COS1 cells, ABU-1 localizes to the endoplas…
F35A5.3	abu-10	WBGene00000033	1.52167	1.6068	0.00642183	0.0801737	abu-10 encodes a transmembrane protein with a predicted signal sequence, a glutamine/asparagine-rich domain and a cysteine-rich repeat (DUF139); abu-10 expression is induced by blockage of the unfolded-protein response in the endoplasmic reticulum (ER), and ABU-10 may function within the ER to protect the organism from damage by improperly folded nascent protein.
T01D1.6	abu-11	WBGene00000034	0.572861	1.65706	0.208068	0.776363	abu-11 encodes a transmembrane protein with a predicted signal sequence, a glutamine/asparagine-rich domain and multiple cysteine-rich repeats (DUF139); abu-11 expression is induced by blockage of the unfolded-protein response in the endoplasmic reticulum, and ABU-11 may help protect the organism from damage by improperly folded nascent protein.
F52D1.3	abu-12	WBGene00004127	0.171492	1.91819	0.755549	1	The protein product of this gene is predicted to contain a glutamine/asparagine (Q/N)-rich ('prion') domain, by the algorithm of Michelitsch and Weissman (as of the WS77 release of WormBase, i.e., in wormpep77).
F57B9.9	abu-13	WBGene00004133	0.845815	1.40505	0.038732	0.295622	The protein product of this gene is predicted to contain a glutamine/asparagine (Q/N)-rich ('prion') domain, by the algorithm of Michelitsch and Weissman (as of the WS77 release of WormBase, i.e., in wormpep77).
ZK1067.7	abu-14	WBGene00004174	1.85247	3.84548	0.000248111	0.00592276	The protein product of abu-14 is predicted to contain a glutamine/asparagine (Q/N)-rich ('prion') domain; abu-14 is transcriptionally up-regulated during times of cuticle synthesis, such as in late embryogenesis and in the molts; it is localized to the pharyngeal cuticle and is required for the function of the pharyngeal grinder.
C03A7.4	abu-15	WBGene00004099	NA	NA	NA	NA	The protein product of this gene is predicted to contain a glutamine/asparagine (Q/N)-rich ('prion') domain, by the algorithm of Michelitsch and Weissman (as of the WS77 release of WormBase, i.e., in wormpep77).
F19G12.7	abu-2	WBGene00000025	0.15098	1.02507	0.791535	1	abu-2 encodes a transmembrane protein with a predicted signal sequence, a glutamine/asparagine-rich domain and multiple cysteine-rich repeats (DUF139); abu-2 expression is induced by blockage of the unfolded-protein response in the endoplasmic reticulum, and ABU-2 may help protect the organism from damage by improperly folded nascent protein.
F31A3.1	abu-3	WBGene00000026	0.639576	-0.201202	0.488566	1	abu-3 encodes a transmembrane protein with a predicted signal sequence, a glutamine/asparagine-rich domain and multiple cysteine-rich repeats (DUF139); abu-3 expression is induced by blockage of the unfolded-protein response in the endoplasmic reticulum (ER), and ABU-3 may function within the ER to protect the organism from damage by improperly folded nascent protein; abu-3 expression is enhanced…
Y5H2A.3	abu-4	WBGene00000027	-0.100626	-0.250719	0.911628	1	abu-4 encodes a transmembrane protein with a predicted signal sequence, a glutamine/asparagine-rich domain and multiple cysteine-rich repeats (DUF139); abu-4 expression is induced by blockage of the unfolded-protein response in the endoplasmic reticulum (ER), and ABU-4 may function within the ER to protect the organism from damage by improperly folded nascent protein; abu-4 expression is enhanced…
Y105C5A.4	abu-5	WBGene00000028	NA	NA	NA	NA	abu-5 encodes a transmembrane protein with a predicted signal sequence, a glutamine/asparagine-rich domain and multiple cysteine-rich repeats (DUF139); abu-5 expression is induced by blockage of the unfolded-protein response in the endoplasmic reticulum (ER), and ABU-5 may function within the ER to protect the organism from damage by improperly folded nascent protein.
C03A7.7	abu-6	WBGene00000029	NA	NA	NA	NA	abu-6 encodes a transmembrane protein with a predicted signal sequence, a glutamine/asparagine-rich domain and multiple cysteine-rich repeats (DUF139); abu-6 is a member of a paralogous group of genes whose expression is transcriptionally up-regulated during times of cuticle synthesis, such as during late embryogenesis and during the molts; abu-6 expression is induced by blockage of the unfolded-…
C03A7.8	abu-7	WBGene00000030	1.43533	-0.0628068	0.0469163	0.337983	abu-7 encodes a transmembrane protein with a predicted signal sequence, a glutamine/asparagine-rich domain and multiple cysteine-rich repeats (DUF139); abu-7 expression is induced by blockage of the unfolded-protein response in the endoplasmic reticulum, and ABU-7 may help protect the organism from damage by improperly folded nascent protein.
C03A7.14	abu-8	WBGene00000031	1.64212	1.59101	0.00141424	0.0246172	abu-8 encodes a transmembrane protein with a predicted signal sequence, a glutamine/asparagine-rich domain and multiple cysteine-rich repeats (DUF139); abu-8 expression is induced by blockage of the unfolded-protein response in the endoplasmic reticulum, and ABU-8 may help protect the organism from damage by improperly folded nascent protein.
R09F10.2	abu-9	WBGene00000032	NA	NA	NA	NA	abu-9 encodes a transmembrane protein (identical to that predicted for the pqn-57 gene) with a predicted signal sequence, a glutamine/asparagine-rich domain and multiple cysteine-rich repeats (DUF139); abu-9 expression is induced by blockage of the unfolded-protein response in the endoplasmic reticulum, and ABU-9 may help protect the organism from damage by improperly folded nascent protein.
F53A2.7	acaa-2	WBGene00009952	0.958474	7.52496	0.00160592	0.0272243
C44E4.6	acbp-1	WBGene00016655	-0.0526645	5.61769	0.825414	1	acbp-1 encodes a highly conserved protein containing a functional acyl-CoA-binding binding domain orthologous to human DBI (Diazepam Binding inhibitor) (OMIM: 125950) required for protein stability and ligand binding; acyl-CoA proteins are required for lipid droplet morphology and lipid storage function; acbp-1 mutants have reduced triglycerides, aberrant lipid droplet morphology and number in th…
F47B10.7	acbp-3	WBGene00009818	0.863098	3.83219	0.00639022	0.0799987	acbp-3 encodes a highly conserved protein containing a functional acyl-CoA-binding binding domain required for protein stability and ligand binding; mutant contains approximately 30% fewer lipid droplets and 20% less triglycerides; loss of ACBP-3 results in 35-40% reduction in lipid chain unsaturation; ACBP-3::GFP is predominantly expressed in hypodermis, body wall muscles and pharynx.
T12D8.3	acbp-5	WBGene00011731	-0.0512305	4.0827	0.747925	1	acbp-5 encodes a highly conserved protein containing a functional acyl-CoA-binding binding domain required for protein stability and ligand binding; contains two ankyrin repeats which may mediate interactions with other proteins; Disruption of ACBP-5 function results in 1.4 times more lipid droplets than in wildtype; ACBP-5 localizes in adult pharynx and intestine with highest expression in anter…
Y17G7B.1	acbp-6	WBGene00012457	-0.0471056	0.908931	0.958692	1	acbp-6 encodes a highly conserved protein containing a functional acyl-CoA-binding binding domain required for protein stability and ligand binding; loss of ACBP-6 results in 35-40% reduction in lipid chain unsaturation; ACBP-6::GFP is uniquely expressed in specific head, body and tail neurons.
F26A1.15	acbp-7	WBGene00044603	-0.142337	4.40844	0.437134	0.984432	acbp-7 encodes a protein containing an acyl-CoA-binding binding domain required for protein stability and ligand binding; several key amino acids necessary for ACBP stability and ligand binding are not conserved in ACBP-7 suggesting it may not be functional as an acyl-CoA binding protein.
F58G6.4	acc-1	WBGene00010275	-0.204132	3.77891	0.299364	0.891826
C53D6.3	acc-2	WBGene00008280	-0.0335435	2.3466	0.870615	1
F55D10.5	acc-3	WBGene00018880	-0.230689	3.09204	0.232822	0.813934
T27E9.9	acc-4	WBGene00012099	-0.257895	4.64748	0.126888	0.613854
C24G7.2	acd-1	WBGene00016064	0.373306	2.1184	0.469079	0.995159
C24G7.4	acd-2	WBGene00016066	-0.619006	2.81985	0.181628	0.734182
C27C12.5	acd-3	WBGene00007775	0.375033	2.58773	0.0800753	0.467106
F28A12.1	acd-4	WBGene00017879	0.38895	2.48209	0.1924	0.750209
T28F2.7	acd-5	WBGene00020903	-0.359659	3.24007	0.122456	0.60214
C55B7.4	acdh-1	WBGene00016943	-0.486825	9.45093	0.205376	0.771858	acdh-1 encodes a short-chain acyl-CoA dehydrogenase; ACDH-1 is predicted to be a mitochondrial enzyme that catalyzes the first step of fatty acid beta-oxidation and thus plays a key role in energy production; steady-state acdh-1 mRNA levels are under the control of the MDT-15 mediator complex subunit; in addition, gene expression studies indicate that acdh-1 expression is upregulated in daf-2 mut…
T08G2.3	acdh-10	WBGene00020366	3.00907	7.40161	9.36084e-11	1.81142e-08	T08G2.3 is orthologous to the human gene ACYL-CoA DEHYDROGENASE, MEDIUM-CHAIN (ACADM; OMIM:607008), which when mutated leads to MCAD deficiency.
Y45F3A.3	acdh-11	WBGene00012860	1.12052	5.3869	4.96322e-05	0.00154591
E04F6.5	acdh-12	WBGene00017125	2.37147	6.22778	1.15035e-06	6.28377e-05	E04F6.5 is orthologous to the human gene ACYL-CoA DEHYDROGENASE, VERY LONG-CHAIN (OMIM:201475), which when mutated leads to VLCAD deficiency, an inborn error of mitochondrial beta-oxidation.
C28C12.9	acdh-13	WBGene00001566	-0.0672252	5.19677	0.688355	1	gei-9 encodes a protein containing a putative acyl-CoA dehydrogenase domain; interacts with GEX-3 in yeast two-hybrid assays.
K06A5.6	acdh-3	WBGene00019433	0.203576	6.56242	0.249147	0.831709
T10E9.9	acdh-4	WBGene00020419	0.0430355	1.18339	0.913346	1
C37A2.3	acdh-5	WBGene00016491	0.378098	0.0678264	0.605352	1
C02D5.1	acdh-6	WBGene00015335	0.141423	0.885809	0.771589	1
T25G12.5	acdh-7	WBGene00020812	3.28384	6.84466	1.41431e-11	3.21578e-09
K05F1.3	acdh-8	WBGene00019406	0.423396	-0.329399	0.680451	1
F28A10.6	acdh-9	WBGene00017874	0.475703	5.73666	0.000521161	0.011013
W09B12.1	ace-1	WBGene00000035	0.42407	5.31796	0.0157979	0.157336	ace-1 encodes a class A acetylcholinesterase that functions redundantly with ACE-2 with respect to total class A acetylcholinesterase activity, and that genetically interacts with ace-2 and ace-3; ace-1 is expressed in the body wall muscle, sphincter muscle, head neurons, a few pharyngeal muscle cells, and the diagonal and spicule muscles of the male.
Y44E3A.2	ace-2	WBGene00000036	-0.510944	6.73816	0.00737124	0.0893885	An acetylcholineesterase involved in the termination of cholinergic nerve transmission; it is predominantly expressed in motoneurons.
Y48B6A.8	ace-3	WBGene00000037	-0.0283301	5.63252	0.850267	1	ace-3 encodes one of four C. elegans acetylcholinesterases (AChE); ACE-3 represents ~5% of the total AChE activity in C. elegans and in vitro, hydrolyzes acetylthio-, butyrylthio-, and propionylthiocholine substrates with equal efficiency; although loss-of-function mutations in ace-3 result in no obvious defects, animals doubly mutant with ace-1 or ace-2 have slight defects in backward locomotion…
Y48B6A.7	ace-4	WBGene00000038	-0.200467	3.87814	0.300438	0.892387	ace-4 encodes an divergent acetylcholinesterase homolog with biochemically undetectable activity.
C44B7.10	acer-1	WBGene00016630	0.17159	10.4539	0.695949	1
C43E11.1	acin-1	WBGene00016601	-0.139464	5.8935	0.415475	0.975402	acin-1 encodes an ortholog of human ACIN1 (OMIM:604562, which induces apoptotic chromatin condensation) and Drosophila HOOK-LIKE.
F59F4.4	acl-1	WBGene00010339	0.652308	5.93432	0.00252876	0.0387189	acl-1 encodes a glycerol-3-phosphate acyltransferase; ACL-1 is predicted to be a membrane protein that plays a role in phospholipid biosynthesis; acl-1 expression decreases gradually throughout aging.
F28B3.9	acl-11	WBGene00017888	-0.372894	4.49045	0.0341311	0.272779
C01C10.3	acl-12	WBGene00015295	0.813116	5.74448	0.00323904	0.0470968
F08G5.2	acl-13	WBGene00008581	-0.0811089	0.26264	0.923366	1
K07B1.5	acl-14	WBGene00019465	0.0496154	6.47261	0.773249	1
T06E8.1	acl-2	WBGene00011543	0.160103	5.04745	0.464186	0.994392	T06E8.1 is orthologous to the human gene 1-ACYLGLYCEROL-3-PHOSPHATE O-ACYLTRANSFERASE 2 (LYSOPHOSPHATIDIC ACID ACYLTRANSFERASE, BETA) (AGPAT2; OMIM:603100), which when mutated leads to disease; T06E8.1 protein is predicted to be mitochondrial.
ZK809.2	acl-3	WBGene00006491	0.00375084	3.44566	0.989607	1	acl-3 encodes a glycerol-3-phosphate acyltransferase that is orthologous to human tafazzin (TAZ; OMIM:300394, mutated in Barth syndrome); by homology, ACL-3 is predicted to be a mitochondrial protein that plays a role in triacylglycerol metabolism; acl-3 expression shows some degree of dauer-specific induction.
F49H12.6	acl-4	WBGene00018657	-0.236669	6.34516	0.122739	0.602831	acl-4 encodes a phosphate acyltransferase; ACL-4 is predicted to be a membrane protein that functions in phospholipid biosynthesis; acl-4 expression can be detected in the pharynx, intestine, hypodermis, muscle, and reproductive system.
R07E3.5	acl-5	WBGene00011106	0.897963	5.54683	0.00126504	0.0222975	acl-5 encode a glycerol-3-phosphate acyltransferase; ACL-5 proteins are predicted to function in phospholipid biosynthesis, and acl-5 expression is highly induced during dauer larval development; large-scale expression studies have reported acl-5 expression in body wall muscle and some unidentified cells in the head.
F08F3.2	acl-6	WBGene00017261	0.185671	5.17365	0.243674	0.825712	acl-6 encodes a mitochondrial glycerol-3-phosphate acyltransferase; acl-6 is predicted to play a role in triacylglycerol biosynthesis, and acl-6 expression is upregulated in animals during dauer larval development in response to direct exposure to daumone.
Y46G5A.21	acl-7	WBGene00012911	0.270698	5.84389	0.219019	0.791568	Y46G5A.21 is orthologous to the human gene GLYCERONEPHOSPHATE O-ACYLTRANSFERASE (GNPAT; OMIM:602744), which when mutated leads to disease.
T05H4.1	acl-8	WBGene00020264	-0.0543311	5.26403	0.745298	1
ZK40.1	acl-9	WBGene00022646	0.211144	6.19147	0.278428	0.866448
D1005.1	acly-1	WBGene00016995	-0.117406	6.44868	0.463749	0.994392
B0365.1	acly-2	WBGene00007150	0.289682	5.05315	0.0656111	0.415023
C42D8.5	acn-1	WBGene00000039	1.24355	2.59161	0.00985532	0.111254	acn-1 encodes an ACE-like protein required for larval development and adult morphogenesis, and probably for cell fusion in larval seam cells; ACN-1 lacks not only the HExxH consensus metallopeptidase motif, but also other active site residues found in the sequence HEAI/VxD of mammalian and insect ACEs; acn-1 is expressed in hypodermal cells, vulval precursor cells, and ray papillae in the male ta…
ZK455.1	aco-1	WBGene00000040	0.572246	8.51264	0.0011358	0.0204557	aco-1 encodes an aconitase that is homologous to mammalian iron regulatory protein-1 (IRP1); aco-1 activity is required for normal brood sizes and, under iron stress conditions, for normal lifespan and L4-to-adult growth rates; ACO-1 physically interacts with GEX-3; like IRP1, ACO-1 has aconitase activity and is post-translationally regulated by iron, but, unlike IRP1, it lacks RNA-binding activi…
F54H12.1	aco-2	WBGene00000041	-0.215615	10.188	0.409234	0.97396	aco-2 encodes an aconitase homolog that is required for embryonic viability, fertility, locomotion, and vulval morphogenesis, and perhaps for normal lifespan.
F08A8.1	acox-1	WBGene00008564	3.29618	7.62957	2.99343e-10	4.73482e-08	acox-1 is orthologous to the human gene ACYL-CoA OXIDASE 1, PALMITOYL (ACOX1; OMIM:264470), which when mutated leads to pseudoneonatal adrenoleukodystrophy.
F08A8.2	acox-2	WBGene00008565	3.29149	3.15978	2.51348e-12	6.81977e-10
F08A8.3	acox-3	WBGene00008566	0.237845	1.33472	0.58782	1
C48B4.1	acox-5	WBGene00008167	0.421749	6.03375	0.089319	0.500682
ZK563.6	acp-1	WBGene00022770	0.481793	3.60873	0.00802666	0.0951102
F14E5.4	acp-2	WBGene00008802	-0.00726376	1.66145	0.978308	1
F14E5.3	acp-3	WBGene00008801	-0.122119	-0.35054	0.888441	1
F14E5.6	acp-4	WBGene00008804	0.172906	1.50778	0.563985	1
F13D11.1	acp-5	WBGene00017427	-0.328582	5.13411	0.174078	0.720243
Y73B6BL.24	acp-6	WBGene00022245	-0.305917	7.79323	0.162288	0.696066
Y73B6BL.25	acp-7	WBGene00022246	-0.286776	3.63668	0.290916	0.882109
R02E12.8	acr-10	WBGene00000049	0.803714	1.89843	0.00547593	0.0714083	acr-10 encodes an alpha-7-like homomer-forming subunit of the nicotinic acetylcholine receptor (nAChR) superfamily which encode ligand-gated ion channels that regulate fast action of acetylcholine at neuromuscular junctions and in the nervous system; ACR-10 is a member of the ACR-16-like group of nAChR subunits.
D2092.3	acr-11	WBGene00000050	-0.0963944	2.60538	0.646842	1	A homolog of an alpha type nicotinic acetylcholine receptor subunit involved in the mediation of fast synaptic transmission at neuromuscular junctions.
R01E6.4	acr-12	WBGene00000051	-0.039214	3.95315	0.811469	1	acr-12 encodes a nicotinic acetylcholine receptor (nAChR) alpha subunit that is a member of the ACR-8-like group of C. elegans nAChR subunits; as an nAChR subunit, ACR-12 is predicted to mediate fast excitatory neurotransmission, however loss of acr-12 activity via mutation or RNAi results in no obvious defects; ACR-12 copurifies with UNC-29 and LEV-1, suggesting that ACR-12 can form receptors wi…
T05C12.2	acr-14	WBGene00000053	0.0102196	0.840759	1	1	acr-14 encodes a protein that contains neurotransmitter-gated ion-channel ligand-binding and transmembrane domains.
F25G6.4	acr-15	WBGene00000054	0.153948	3.62987	0.401978	0.969203	A homolog of an alpha type nicotinic acetylcholine receptor subunit involved in the mediation of fast synaptic transmission at neuromuscular junctions.
F25G6.3	acr-16	WBGene00000055	0.0450202	3.90531	0.817717	1	acr-16 encodes an alpha-7-like homomer-forming subunit of the nicotinic acetylcholine receptor (nAChR) superfamily orthologous to human nicotinic cholinergic receptor alpha 7 (CHRNA7; OMIM:118511; possibly associated with schizophrenia and juvenile myoclonic epilepsy); ACR-16 functions as a ligand-gated ion channel that is required for the major fast cholinergic excitatory current at C. elegans n…
F53E10.2	acr-17	WBGene00000056	-0.10042	3.07725	0.645421	1	an ortholog of alpha subunit of nicotinic acetylcholine receptor (nAChR).
F28F8.1	acr-18	WBGene00000057	-0.0468585	3.35423	0.810047	1	acr-18 encodes an alpha subunit of nicotinic acetylcholine receptor (nAChR), predicted to be a ligand-gated ion channel regulating fast action of acetylcholine at neuromuscular junctions and in the nervous system; ACR-18 falls into the 'DEG-3' class of nAChR subunits, apparently unique to nematodes, which includes DEG-3, DES-2, ACR-5, ACR-17, ACR-20, and ACR-23.
C31H5.3	acr-19	WBGene00000058	-0.0551224	4.40482	0.738425	1	acr-19 encodes a predicted member of the alpha subunit family of nicotinic acetylcholine receptors.
K11G12.2	acr-2	WBGene00000042	-0.111816	3.4282	0.544512	1	A homolog of a non-alpha type nicotinic acetylcholine receptor subunit that forms a functional channel when co-expressed with the unc-38 alpha subunit.
R06A4.10	acr-20	WBGene00000059	-0.254543	3.65271	0.136326	0.637802	acr-20 encodes an alpha 7-like homomer-forming subunit of the nicotinic acetylcholine receptor (nAChR) superfamily which encode ligand-gated ion channels that regulate fast action of acetylcholine at neuromuscular junctions and in the nervous system; ACR-20 is a member of the DEG-3-like group of nAChR subunits which appears to be unique to nematodes.
F27B3.2	acr-21	WBGene00000060	-0.0428695	2.85238	0.82358	1	acr-21 encodes an alpha subunit of nicotinic acetylcholine receptor (nAChR); ACR-21 is a highly divergent member of the 'ACR-16' class of nAChR subunits, which includes ACR-7, ACR-9, ACR-10, ACR-11, ACR-14, ACR-15, ACR-16, and ACR-19, and is most closely related to the alpha-7 subunits of vertebrate nAChRs.
F59B1.9	acr-23	WBGene00000062	0.35414	2.46914	0.127784	0.616059	acr-23 encodes an alpha 7-like homomer-forming subunit of the nicotinic acetylcholine receptor (nAChR) superfamily which encode ligand-gated ion channels that regulate fast action of acetylcholine at neuromuscular junctions and in the nervous system; ACR-23 is a member of the DEG-3-like group of nAChR subunits which appears to be unique to nematodes.
Y73F8A.30	acr-24	WBGene00013534	-0.0350404	3.44467	0.841935	1	acr-24 encodes a nicotinic acetylcholine receptor (nAChR) alpha subunit that is a member of the DEG-3 subgroup of C. elegans nAChRs; ACR-24 is thus predicted to function in regulation of fast neurotransmission.
Y73B6BL.42	acr-25	WBGene00043066	-0.0937779	3.50187	0.594823	1
K11G12.7	acr-3	WBGene00000043	-0.402262	2.1258	0.116274	0.585231	acr-3 encodes a non-alpha subunit of the nicotinic acetylcholine receptor (nAChR) superfamily; ACR-3 functions as a ligand-gated ion channel that likely mediates fast actions of acetylcholine at neuromuscular junctions and in the nervous system; when coexpressed with UNC-38, an nAChR alpha subunit, the resulting hetero-oligomer can form levamisole-gated channels; ACR-3 is a member of the UNC-29-l…
K03F8.2	acr-5	WBGene00000044	-0.0972222	2.85628	0.673891	1	acr-5 encodes a predicted member of the alpha subunit family of nicotinic acetylcholine receptors that is expressed in the nervous system.
ZK973.5	acr-6	WBGene00000045	-0.0195486	1.27906	0.970516	1	acr-6 encodes a nicotinic acetylcholine receptor (nAChR) alpha subunit that is a member of the UNC-38 subgroup of C. elegans nAChRs; ACR-6 is thus predicted to function in regulation of fast neurotransmission.
T09A5.3	acr-7	WBGene00000046	-0.0996594	2.81557	0.698616	1	acr-7 encodes an alpha-7-like homomer-forming subunit of the nicotinic acetylcholine receptor (nAChR) superfamily which encode ligand-gated ion channels that regulate fast action of acetylcholine at neuromuscular junctions and in the nervous system; ACR-7 is expressed pharyngeal muscle and in tail neurons distal to the anus, and is a member of the ACR-16-like group of nAChR subunits.
ZC504.2	acr-8	WBGene00000047	0.34455	4.00682	0.10608	0.554004	acr-8 encodes an alpha subunit of nicotinic acetylcholine receptor (nAChR); ACR-8 falls into the 'ACR-8' class of nAChR subunits, which includes ACR-12 and ACR-13.
C40C9.2	acr-9	WBGene00000048	0.0529828	2.02943	0.8574	1	acr-9 encodes a predicted member of the alpha subunit family of nicotinic acetylcholine receptors.
F46E10.1	acs-1	WBGene00018488	0.675073	5.80356	0.0028068	0.0421252
AH10.1	acs-10	WBGene00007082	-0.0872352	1.40728	0.90575	1
F41C3.3	acs-11	WBGene00018269	0.129894	7.17853	0.654927	1
F25C8.4	acs-12	WBGene00009106	-0.346842	4.77816	0.0794241	0.46544
Y65B4BL.5	acs-13	WBGene00022037	0.860254	7.5692	0.00770998	0.0922662
F11A3.1	acs-14	WBGene00008669	0.999039	6.81592	0.000624381	0.0127184
F47G6.2	acs-16	WBGene00018579	-0.383788	4.26924	0.0289292	0.243337
C46F4.2	acs-17	WBGene00016716	0.307357	7.77838	0.383451	0.957597
R09E10.3	acs-18	WBGene00011173	0.0910716	0.00326858	0.935451	1
C36A4.9	acs-19	WBGene00007969	-0.52649	9.12272	0.113371	0.576054
F28F8.2	acs-2	WBGene00009221	-0.656599	9.87909	0.357876	0.939053	acs-2 encodes an acyl-CoA synthetase; by homology, ACS-2 is predicted to catalyze conversion of a fatty acid to Acyl-CoA for subsequent beta oxidation; accordingly, loss of acs-2 activity via RNAi results in defects in fat metabolism; an ACS-2::GFP reporter fusion protein is widely expressed and appears to localize to mitochondria; acs-2 expression is positively regulated by the NHR-49 nuclear ho…
F28D1.9	acs-20	WBGene00009218	0.109845	4.62005	0.481734	1	acs-20 encodes a protein homologous to the mammalian FATP1 and FATP4 fatty acid transport proteins (FATP)/very long chain fatty acid acyl-CoA synthetases; acs-20 activity is required for proper cuticle development, specifically formation of a cuticle surface barrier that prevents penetration of small molecules; acs-20 may affect cuticle development via its role in incorporation of very long chain…
C50H11.1	acs-21	WBGene00016849	-0.174955	3.98207	0.249018	0.831603
D1009.1	acs-22	WBGene00017012	-0.0576954	6.5916	0.86113	1	acs-22 encodes a protein homologous to the mammalian FATP1 and FATP4 fatty acid transport proteins (FATP)/very long chain fatty acid acyl-CoA synthetases; acs-22 functions redundantly with acs-20 to regulate formation of the cuticle surface barrier that prevents penetration of small molecules; acs-22 may affect cuticle development via its role in incorporation of very long chain fatty acids, but …
T08B1.6	acs-3	WBGene00020343	-0.473984	3.03881	0.151873	0.675492
F37C12.7	acs-4	WBGene00018152	0.188344	7.68836	0.321394	0.910185
Y76A2B.3	acs-5	WBGene00013575	1.49975	6.60791	2.22734e-06	0.000111306
ZK1127.2	acs-6	WBGene00022849	0.239792	-0.49193	0.820627	1
C01G6.7	acs-7	WBGene00007228	1.63325	5.09294	0.0045947	0.0624179
T20F7.7	acs-9	WBGene00020634	-0.0388427	2.6006	0.844315	1
T04C12.6	act-1	WBGene00000063	-0.322195	7.94532	0.138936	0.642513	act-1 encodes an actin isoform that is required for proper body wall muscle and pharyngeal muscle structures and the motility of animals; actins have highly similar amino acid sequences; ACT-1 is identical to ACT-3; act-1 functions redundantly with two other actin isoforms, act-2 and act-3, to control cytoplasmic microfilament function in the early embryo.
T04C12.5	act-2	WBGene00000064	0.790623	5.9044	1.65993e-06	8.67649e-05	act-2 encodes one of five C. elegans actins; act-2 functions redundantly in early embryonic cortical microfilaments with act-1 and act-3, and dominant mutations in act-2 result in uncoordinated locomotion; an ACT-2::GFP reporter fusion is expressed in the cytoplasm of embryonic cells and is also found in contractile filaments in adult muscle cells.
T04C12.4	act-3	WBGene00000065	-0.187671	8.75396	0.456733	0.992743	act-3 encodes an invertebrate actin, highly similar to ACT-1, ACT-2, and ACT-4, that functions in body wall muscle; act-3 functions with two other action isoforms, act-1 and act-2, to control cytoplasmic microfilament function in the early embryo.
M03F4.2	act-4	WBGene00000066	-0.162365	9.65624	0.406197	0.97204	act-4 encodes an actin isoform that is most similar to act-2 in amino acid sequence; an act-4 reporter gene is expressed in body wall and vulval muscles and the spermatheca.
T25C8.2	act-5	WBGene00000067	0.61518	8.67574	0.0173257	0.167862	act-5 encodes an ortholog of human cytoplasmic actin; act-5 is required for formation of the terminal web and microvilli on the apical surface of intestinal cells; act-5 also plays a role in mediating non-lytic exit of intracellular parasites from the intestine; act-5 is expressed only in intestinal cells and in the excretory cell; in the intestine, ACT-5 localizes to microvilli and the terminal …
F17C8.1	acy-1	WBGene00000068	-0.254879	6.78064	0.142552	0.651842	acy-1 encodes an adenylyl cyclase that is most closely related to the divergent mouse isoform type IX; acy-1 is required for viability, muscle contraction, locomotion, molting, and regulation of sleep-like behavior (lethargus) during larval development; acy-1 acts genetically downstream of gsa-1 and is expressed in excitable cells.
C10F3.3	acy-2	WBGene00000069	-0.0226704	4.70274	0.888539	1	acy-2 encodes an adenylyl cyclase; an intragenic deletion of acy-2 is lethal at the first larval stage of development; the terminal phenotype resembles that seen in loss-of-function gsa-1 mutants.
C44F1.5	acy-3	WBGene00000070	0.150744	6.18713	0.369669	0.951508	acy-3 encodes a predicted member of the adenylyl cyclase family with highest similarity to human adenylate cyclase type 5; expressed in the support cells of ciliated neurons, in the head and tail ganglia, in two pairs of neurons in the retrovesicular ganglia, and in the spermatheca.
T01C2.1	acy-4	WBGene00000071	-0.18616	4.49663	0.255846	0.840809	acy-4 encodes an adenylate cyclase most similar to vertebrate type V and type VI adenylate cyclases; by homology, ACY-4 is a predicted plasma membrane protein that catalyzes the conversion of ATP to cyclic AMP, a key second messenger in intracellular signaling.
F32A5.1	ada-2	WBGene00017967	0.180503	5.76782	0.361011	0.942857
VW02B12L.4	adbp-1	WBGene00012157	-0.0441798	3.62222	0.854565	1
F39C12.2	add-1	WBGene00000072	-0.346557	4.76418	0.0283641	0.24042	add-1 encodes an ortholog of the cytoskeletal protein alpha-adducin (ADD1, OMIM:102680, mutations are associated with susceptibility to salt-sensitive essential hypertension); by homology, ADD-1 is predicted to be a cell membrane-associated protein that mediates localized changes in the cytoskeleton in response to activation of signal transduction cascades; in C. elegans, ADD-1 activity is requir…
F57F5.4	add-2	WBGene00000073	-0.449569	4.91616	0.0104642	0.116064	add-2 encodes a protein containing an alpha-adducin-like head domain that while highly similar in sequence to the head domain of vertebrate and Drosophila adducins, atypically resides at the C-, rather than N-, terminus of the protein; by homology, ADD-2 is predicted to be a cell membrane-associated cytoskeletal protein that mediates cytoskeletal rearrangements in response to activation of signal…
C04A11.4	adm-2	WBGene00000074	-0.0200983	4.60519	0.928951	1	adm-2 encodes a protein containing a snake venom disintegrin-domain and a metalloprotease-like domain (i.e., a protein of the ADAM family); like ADM-1, ADM-2 is homologous to a mammalian sperm glycoprotein (PH-30/fertilin) implicated in sperm-egg fusion, and ADM-2 might thus be a fusogenic protein mediating the merging of plasma membranes during development.
ZK154.7	adm-4	WBGene00000075	-0.38422	4.18353	0.0212356	0.194065	adm-4 encodes a member of the ADAM (disintegrin plus metalloprotease) family; ADM-4 is highly expressed in most post-embryonic tissues.
T21B4.4	ador-1	WBGene00011878	0.230278	3.69278	0.226134	0.802357
Y73E7A.9	adpr-1	WBGene00044440	-0.271781	4.7472	0.213596	0.783384
H15N14.1	adr-1	WBGene00000079	0.0225772	6.20508	0.907264	1	adr-1 encodes, through alternative splicing, at least five isoforms of an adenosine deaminase that acts on RNA (ADAR); ADARs are RNA-editing enzymes that deaminate adenosines to create inosines in double-stranded RNA (dsRNA); adr-1 is expressed in embryos, most or all neurons (e.g., sensory neurons and cilia, the ventral nerve cord, motor neurons and interneurons) and in the developing (but not t…
T20H4.4	adr-2	WBGene00000080	0.0328486	5.142	0.846085	1	adr-2 encodes an adenosine deaminase that acts on RNA (ADAR); ADARs are RNA-editing enzymes that deaminate adenosines to create inosines in double-stranded RNA (dsRNA); adr-2 is expressed ubiquitously in early embryos, as well as in the germline of early adults; ADR-2 is required for ADAR activity in vivo, and for normal chemotaxis.
Y50D7A.7	ads-1	WBGene00000081	0.581005	7.88398	0.0248014	0.218363	ads-1 encodes an ortholog of human ALKYL-DIHYDROXYACETONEPHOSPHATE SYNTHASE PRECURSOR (AGPS; OMIM:603051) that is required for normal larval development; mutation of human AGPS leads to type 3 rhizomelic chondrodysplasia punctata (OMIM:600121).
R06C7.5	adsl-1	WBGene00011064	-0.13616	5.72222	0.437078	0.984432	The R06C7.5 gene encodes an ortholog of the human gene ADSL, which when mutated leads to adenylosuccinate lyase deficiency (OMIM:103050).
C37H5.6	adss-1	WBGene00016509	-0.199517	10.3335	0.254705	0.839784
C02B4.1	adt-1	WBGene00000082	0.223824	3.23863	0.410879	0.974034	The adt-1 gene encodes a metalloproteinase with disintegrin-like and metalloproteinase with thrombospondin type I motifs (ADAMTS) that is required for male tail morphogenesis.
F08C6.1	adt-2	WBGene00000083	-0.350425	7.13265	0.0772317	0.45865	adt-2 encodes a member of the ADAMTS (a disintegrin and metalloprotease with thrombospodin motif) family of secreated metalloproteases; ADT-2 binds to extracellular matrix and is involved in remodeling of the extracellular matrix; homozygous adt-2 mutants die at the 3-fold stage of embryogenesis or during hatching; adult worms are about 20% reduced body length as compared to the wild type; adt-2 …
D2030.10	aex-1	WBGene00000084	0.325397	4.07262	0.105316	0.551915	aex-1 encodes a novel, C2 calcium-binding domain protein that is similar to human BAP3 proteins and rat Munc13; in C. elegans, AEX-1 functions in retrograde signaling to regulate presynaptic activity and localization of the synaptic vesicle fusion protein UNC-13; AEX-1 is required for the defecation motor program, specifically the anterior body wall and enteric muscle contractions, and for normal…
T14B1.2	aex-2	WBGene00000085	0.539592	3.55544	0.00369745	0.052079	aex-2 encodes a G-protein-coupled receptor; aex-2 functions in the nervous system to activate a G(s) alpha (gsa-1) signaling pathway that regulates defecation in the hermaphrodite digestive tract; in regulating the defecation cycles, AEX-2 likely serves as the receptor for the NLP-40 neuropeptide secreted by the intestine; an AEX-2::GFP reporter fusion is expressed in the nerve ring, ventral nerv…
C02H7.3	aex-3	WBGene00000086	-0.1958	6.01957	0.192053	0.749825	aex-3 encodes a guanine nucleotide exchange factor for the rab-3 GTPase that is orthologous to human MAP kinase activating protein containing death domain (MADD, OMIM:603584); AEX-3 is required for intracellular vesicle trafficking as well as synaptic vesicle release and interacts with CAB-1 and RAB-3 to regulate separate pathways for neural activities such as defecation and male mating, respecti…
T14G12.2	aex-4	WBGene00006454	1.71496	1.31239	1.46612e-07	1.04995e-05
F32A7.6	aex-5	WBGene00000088	-0.239415	4.45026	0.159006	0.689631	an ortholog of calcium-dependent serine endoproteinases, the kex2/subtilisin-like proprotein convertase that affects defecation cycle and anterior body contractions; and is expressed in all muscle cells except pharyngeal muscles.
Y87G2A.4	aex-6	WBGene00000089	0.122616	5.76926	0.522357	1	aex-6 encodes a Rab small GTPase; aex-6 was identified in screens for defecation defective mutants and high-temperature-induced dauer formation mutants; aex-6 appears to act in the insulin branch of the dauer pathway; aex-6 is genetically required for two different steps of normal defecation in the hermaphrodite digestive tract; since its mutant phenotype resembles that induced by ablation of the…
C25B8.5	aexr-1	WBGene00016089	-0.17583	2.47136	0.460896	0.993932
C25B8.7	aexr-2	WBGene00016090	-0.104503	1.06318	0.804094	1
C48C5.3	aexr-3	WBGene00016748	-0.0191689	3.51128	0.943256	1
W03F11.6	afd-1	WBGene00021009	0.346801	6.51555	0.0417305	0.311353
C44B7.3	aff-1	WBGene00016625	0.123354	2.54113	0.638956	1	aff-1 encodes a cell-surface protein required in late L4 larvae for various cell fusions, of which at least one (AC-utse) does not require EFF-1; in vulval development, AFF-1 is required for fusion of the anchor cell (AC) with the utse syncytium, of A cells to one another, and of D cells to one another; AFF-1 is also required for lateral seam cell fusions; since aff-1 mutants fail to mix AC with …
D2024.2	afmd-1	WBGene00017051	-0.569964	2.11854	0.0391547	0.297877
B0334.8	age-1	WBGene00000090	-0.279334	5.57224	0.126378	0.613017	age-1 encodes the C. elegans ortholog of the phosphoinositide 3-kinase (PI3K) p110 catalytic subunit; AGE-1, supplied maternally and embryonically, is a central component of the C. elegans insulin-like signaling pathway, lying downstream of the DAF-2/insulin receptor and upstream of both the PDK-1 and AKT-1/AKT-2 kinases and the DAF-16 forkhead type transcription factor, whose negative regulation…
Y6B3A.1	agef-1	WBGene00012386	0.0884815	6.36272	0.579341	1	agef-1 encodes a putative ARF guanine nucleotide exchange factor orthologous to human ARFGEF1 (OMIM:604141) and ARFGEF2 (OMIM:605371); agef-1(RNAi) inhibits CAV-1 body formation in oocytes more severely than arf-1 disruption alone, indicating that activation of both ARF-1 and ARF-3 by AGEF-1 may be required for transport of caveolin from Golgi to CAV-1 bodies during oogenesis; more generally, AGE…
R06A4.8	agl-1	WBGene00011050	-0.0812118	5.92622	0.735562	1	agl-1 encodes a protein orthologous to human amylo-alpha-1, 6-glucosidase, 4-alpha-glucanotransferase (AGL), also known as Glycogen Debrancher Enzyme (EC:2.4.1.25, 3.2.1.33); ALG is involved in the breakdown of the complex sugar, glycogen.
BE10.2	agmo-1	WBGene00007210	0.447931	2.73879	0.0643732	0.410808
F41G3.12	agr-1	WBGene00018304	-0.198006	5.48949	0.188039	0.743411	agr-1 encodes a large (1396-residue) putative agrin, orthologous to human AGRIN (OMIM:103320), EGFLAM, and Q9NQ15; AGR-1 is expressed in buccal epithelium and deposited in pharyngeal basal epithelium; AGR-1 is also expressed in IL1 neurons, distal tip cells, and intestine; an AGR-1 fragment can cluster vertebrate dystroglycan in cell culture; agr-1(eg1770) mutations show no obvious phenotype, inc…
F32A6.4	ags-3	WBGene00000092	-0.0989554	6.43657	0.532887	1	ags-3 encodes a protein containing N-terminal TRP domains and C-terminal GPR domains that is a member of the Activator of G Protein Signaling 3 (AGS3) family of proteins that includes mammalian AGS3 and LPN and Drosophila RAPSYNOID; in C. elegans, AGS-3 is involved in polarity and spindle orientation during early embryogenesis; in addition, AGS-3, along with the RIC-8 guanine nucleotide exchange …
Y62E10A.5	agt-1	WBGene00000093	0.0598246	3.76552	0.781521	1	agt-1 encodes an ortholog of the DNA repair enzyme O6-Alkylguanine DNA-alkyltransferase (AGT).
F09E5.13	agt-2	WBGene00000094	0.00994527	3.02776	0.966148	1	agt-2 encodes a paralog of the DNA repair enzyme O6-Alkylguanine DNA-alkyltransferase (AGT); AGT-2 has AGT biochemical activity and is expressed at all developmental stages.
C25A1.11	aha-1	WBGene00000095	0.131722	5.66813	0.491841	1	aha-1 encodes an ortholog of human aryl-hydrocarbon receptor nuclear translocator; AHA-1 interacts with AHR-1 and HIF-1 in vitro, requires HIF-1 for proper localization, and is expressed ubiquitously; AHA-1 also physically interacts with CKY-1, and when co-expressed in vitro, an AHA-1/CKY-1 complex exhibits sequence-specific DNA binding; when co-expressed in cultured cells, the AHA-1/CKY-1 comple…
K02F2.2	ahcy-1	WBGene00019322	0.0727621	10.1206	0.71115	1	ahcy-1 encodes the C. elegans S-adenosylhomocysteine hydrolase (SAHH) ortholog; by homology, AHCY-1 is predicted to catalyze the hydrolysis of S-adenosyl-L-homocysteine to adenosine and L-homocysteine; loss of ahcy-1 activity via RNAi results in embryonic and larval lethality, abnormal body morphology, sick animals, and uncoordinated locomotion; Northern blot analyses indicate the ahcy-1 mRNA is …
K04G2.2	aho-3	WBGene00045192	0.02647	6.16439	0.863472	1	aho-3 encodes a hydrolase; aho-3 is required for temperature preference, a learning-like behavior associating feeding conditions with temperatures; while normal C. elegans thermotax away from those temperatures at which they have been starved for 1 hour, aho-3(nj15) mutants fail to show this connection of temperature preference to recent starvation; although aho-3(nj15) mutants fail to show corre…
C41G7.5	ahr-1	WBGene00000096	-0.0214704	3.16996	0.94507	1	ahr-1 encodes an aryl hydrocarbon receptor (ligand-activated basic helix-loop-helix transcription factor) ortholog that biochemically resembles its vertebrate relatives (OMIM:600253) which mediate the carcinogenic and teratogenic effects of environmental toxins; AHR-1 activity is required for specification of RMEL and RMER GABAergic neuron cell fate and negative regulation of spontaneous movement…
C06G1.4	ain-1	WBGene00015547	0.018756	8.16033	0.91209	1	ain-1 encodes an unfamiliar protein synergistically required, with LIN-31, for the normal timing of vulval differentiation, independently of LET-60/RAS, and parallel to or downstream of LIN-14/LIN-28/HBL-1; AIN-1 is expressed in cytoplasmic foci (that are probably P bodies) in several tissues, including vulval precursor cells and neurons; AIN-1 coimmunoprecipitates with DCR-1 and ALG-1, also bind…
B0041.2	ain-2	WBGene00015007	0.106225	8.03327	0.50422	1	ain-2 encodes, by alternative splicing, three isoforms of an unfamiliar protein paralogous to AIN-1, and homologous to Brugia malayi 14748.m00068, 14052.m00191, and 14963.m01790; AIN-2 protein binds GEI-4 and GEI-16 in yeast two-hybrid experiments; AIN-2 and its nematode homologs have weak similarity to human TNRC6A (GW182; OMIM:610739) and Drosophila GAWKY; ain-2 has no obvious function in mass …
F58E10.4	aip-1	WBGene00000097	0.327492	4.98258	0.0510367	0.356786	aip-1 encodes an AN-1-like zinc finger-containing protein homologous to arsenite-inducible RNA-associated protein (AIRAP), conserved among C. elegans, Drosophila, and mammals; like AIRAP itself, AIP-1 protects cells from arsenite toxicity; AIP-1 is a predicted RNA binding protein that may function in ubiquitin-mediated proteolysis following arsenite treatment; AIP-1 does not appear to be essentia…
K08F9.2	aipl-1	WBGene00010685	0.122856	4.96738	0.443729	0.987554	aipl-1 encodes a conserved WD-repeat protein that cooperates with ADF/cofilin and is highly homologous to AIP-1; the sequence of the encoded protein is 66% identical to UNC-78; aipl-1 and unc-78 have redundant and overlapping functions in organized assembly of actin filaments in embryonic muscle and the unc-78 and aipl-1 double mutant is embryonic lethal; both AIPL-1 isoforms preferentially coope…
K07C11.2	air-1	WBGene00000098	0.674653	4.10875	0.00147977	0.0254897	AIR-1 belongs to the Aurora-A family of serine/threonine kinases that localize to centrosomes; AIR-1 is required for embryonic survival, germline proliferation and development, locomotion, and vulval development; AIR-1 is required to recruit centrosomal gamma-tubulin during maturation; Aurora-A kinases are implicated in centrosome separation and spindle assembly.
B0207.4	air-2	WBGene00000099	0.213412	3.47569	0.380856	0.95655	air-2 encodes an aurora/Ipl1-related serine/threonine protein kinase that affects embryonic viability and chromosome segregation during meiosis and mitosis and is required for cytokinesis; AIR-2 has two functions during mitosis, one in chromosome segregation, and a second, independent function in cytokinesis through ZEN-4; AIR-2 and ZEN-4 may act in parallel to a second pathway that includes CYK-…
C25A11.4	ajm-1	WBGene00000100	-0.290751	7.91806	0.177457	0.726967	ajm-1 encodes a member of the apical junction molecule class that is required for correct elongation of the C. elegans embryo; AJM-1 contains a coiled-coil motif; AJM-1 binds DLG-1 in vitro, in yeast two-hybrid assays, and in vivo; AJM-1 is mislocalized in a dlg-1(RNAi) background; LET-413 is required for rapid confinement of DLG-1 and AJM-1 to a narrow apical region in C. elegans epithelia; CLC-…
D1022.7	aka-1	WBGene00000101	-0.0625432	6.79729	0.74751	1	aka-1 encodes an A kinase anchor protein that has mutiple isoforms, all of which have a zinc-finger domain of the FYVE type; interacts with KIN-2 in vitro.
C56G2.1	akap-1	WBGene00016977	-0.0488993	8.77165	0.834968	1
E01A2.6	akir-1	WBGene00017088	0.13829	6.64714	0.368479	0.950728
C12D8.10	akt-1	WBGene00000102	-1.33434	7.71102	2.0489e-14	8.2821e-12	akt-1 encodes an ortholog of the serine/threonine kinase Akt/PKB; akt-1 genetically interacts with the insulin signaling pathway and functions to regulate such processes as dauer larval development and salt chemotaxis learning; AKT-1 binds calmodulin in vitro in a calcium-dependent manner; an AKT-1::GFP fusion protein is widely expressed beginning in late stage embryos and continuing through adul…
F28H6.1	akt-2	WBGene00000103	-0.675368	6.71427	8.90406e-05	0.00251498	akt-2 encodes a homolog of the serine/threonine kinase Akt/PKB, AKT-2, that is required for progression through the dauer stage of development and for the negative regulation of adult lifespan; inactivation of akt-2 causes animals to arrest constitutively at the dauer stage, while having an increased life span; widely expressed, AKT-2 is activated by the phospholipid products of phosphoinositide …
T05D4.1	aldo-1	WBGene00011474	0.359471	8.28009	0.0838878	0.480269	aldo-1 is orthologous to the human gene ALDOLASE A, FRUCTOSE-BISPHOSPHATE (ALDOA; OMIM:103850), which when mutated leads to aldolase A deficiency.
F01F1.12	aldo-2	WBGene00017166	-0.581368	9.97828	0.00338319	0.0484814	aldo-2 encodes a fructose-bisphosphate aldolase homologous to human ALDOB, which when mutated leads to fructosemia, hereditary fructose intolerance (OMIM:229600).
F18A1.6	alfa-1	WBGene00017547	0.125296	5.40381	0.453886	0.990729
F48F7.1	alg-1	WBGene00000105	0.0213693	8.00945	0.910648	1	alg-1 encodes an Argonaut ortholog; alg-1 is involved in RNA interference and affects developmental timing along with alg-2 and dcr-1 by regulating expression of the lin-4 and let-7 small temporal RNAs.
T07D3.7	alg-2	WBGene00000106	0.213268	5.92956	0.192238	0.750209	alg-2 encodes a PAZ and PIWI-domain containing protein that is a member of the highly conserved eukaryotic RDE-1/AGO1/PIWI family of proteins that regulate posttranscriptional gene silencing (PTGS); ALG-2 functions with ALG-1 to control specific developmental timing events by positively regulating expression of small temporal RNAs (stRNAs) encoded by lin-4 and let-7; ALG-2 and ALG-1 are also requ…
T22B3.2	alg-3	WBGene00011910	-0.0477242	1.72254	0.947966	1	alg-3 encodes an Argonaute (AGO) protein that is a member of the AGO clade of Argonaute small RNA-binding proteins; together with its paralog, alg-4, alg-3 is required for normal brood sizes at elevated temperatures, specifically for the process of spermiogenesis in which spermatids are converted to mobile ameboid sperm; alg-3/4 is also required for accumulation of male germline-specific 26G-RNAs…
ZK757.3	alg-4	WBGene00006449	0.30727	1.27583	0.693976	1	alg-4 encodes an Argonaute (AGO) protein that is a member of the AGO clade of Argonaute small RNA-binding proteins; together with its paralog, alg-3, alg-4 is required for normal brood sizes at elevated temperatures, specifically for the process of spermiogenesis in which spermatids are converted to mobile ameboid sperm; alg-3/4 is also required for accumulation of male germline-specific 26G-RNAs…
T26A5.4	algn-1	WBGene00020820	-0.145117	3.71104	0.449693	0.989237
B0361.8	algn-11	WBGene00015162	-0.105608	5.37349	0.550762	1
R10D12.12	algn-13	WBGene00011193	0.0753783	3.59484	0.701059	1
M02B7.4	algn-14	WBGene00019725	0.00450777	3.0782	0.989678	1
F09E5.2	algn-2	WBGene00017282	-0.0905947	5.26298	0.605984	1
Y60A3A.14	algn-7	WBGene00013362	0.129102	2.80788	0.576273	1
F54D8.3	alh-1	WBGene00000107	-0.772544	10.0137	0.00401841	0.0557976	alh-1 is orthologous to the human gene ALDEHYDE DEHYDROGENASE 2, MITOCHONDRIAL (ALDH2; OMIM:100650), in which a polymorphism can lead to acute ethanol intolerance.
C54D1.4	alh-10	WBGene00000116	0.946813	4.94123	8.23132e-05	0.00236911
F42G9.5	alh-11	WBGene00000117	-0.0657277	5.78336	0.670407	1
Y69F12A.2	alh-12	WBGene00000118	-1.11152	7.23883	1.68759e-08	1.6242e-06
T22H6.2	alh-13	WBGene00011938	1.79727	4.98339	4.65077e-07	2.74667e-05
K04F1.15	alh-2	WBGene00000108	0.129841	1.00733	0.826027	1
F36H1.6	alh-3	WBGene00000109	-0.101853	6.42923	0.608508	1	alh-3 encodes an aldehyde dehydrogenase predicted to be mitochondrial.
T05H4.13	alh-4	WBGene00000110	2.22086	8.35288	9.0315e-06	0.000365887
T08B1.3	alh-5	WBGene00000111	1.14042	6.81952	0.000263064	0.00623876
F56D12.1	alh-6	WBGene00000112	-0.0388669	6.81377	0.812089	1	alh-6 is orthologous to the human gene ALDEHYDE DEHYDROGENASE 4 FAMILY, MEMBER A1 (ALDH4A1; OMIM:606811), which when mutated leads to hyperprolinemia type II.
F45H10.1	alh-7	WBGene00000113	0.0502173	5.09288	0.836062	1	alh-7 encodes an ortholog of the human gene DJ73M23.2 (NAD+-DEPENDENT SUCCINIC SEMIALDEHYDE DEHYDROGENASE; ALDH5A1), which when mutated leads to SSADH deficiency (OMIM:271980).
F13D12.4	alh-8	WBGene00000114	-0.3243	10.5571	0.209382	0.778244	alh-8 is orthologous to the human gene METHYLMALONATE-SEMIALDEHYDE DEHYDROGENASE (ALDH6A1; OMIM:603178), which when mutated leads to MMSDH deficiency.
F01F1.6	alh-9	WBGene00000115	-0.441393	6.25403	0.0214243	0.195244	alh-9 encodes a highly conserved aldehyde dehydrogenase that is a member of the ALDH7 (antiquitin/ATQ) family of aldehyde dehydrogenases, mutations in which are associated with pyridoxine-dependent epilepsy (OMIM:107323); by sequence similarity, ALH-9 is predicted to catalyze aldehyde oxidation; loss of alh-9 activity via RNAi results in embryonic and larval lethality, slow growth, sterility, and…
C14B1.10	alkb-8	WBGene00007581	-0.173516	5.84947	0.48007	0.999599
T11B7.4	alp-1	WBGene00001132	-0.121805	7.04084	0.482978	1	alp-1 encodes the C. elegans ortholog of the ALP (alpha-actininassociated LIM protein)-Enigma family of proteins that are found at sites of actin filament anchorage, such as the muscle Z disk; in C. elegans, alp-1 is required for maintenance of actin filament organization and for stabilizing muscle contraction; ALP-1 co-localizes with alpha-actinin at body wall muscle dense bodies, and its locali…
R08B4.2	alr-1	WBGene00044330	-0.02799	4.2656	0.862652	1	alr-1 encodes a homeodomain transcription factor orthologous to aristaless/human Arx; alr-1 regulates the development of sensory neurons in the head and GABAergic motor neurons; ALR-1 affects touch receptor neuron (TRN) fate by acting as a transcriptional activator and is required selectively for TRN gene expression; alr-1 expression in TRNs depends on MEC-3; ALR-1 ensures TRN differentiation by …
R10E12.1	alx-1	WBGene00007010	0.102641	6.91384	0.604175	1	alx-1 encodes one of two C. elegans Bro1 domain-containing proteins; during development, ALX-1 functions in the regulation of protein trafficking via endocytic recycling of clathrin-independent cargo and membrane-protein degradation; ALX-1 physically interacts with RME-1, a component of recycling endosomes that regulates endocytic recycling of receptor proteins, and LIN-12/Notch whose downregulat…
C01F6.5	aly-1	WBGene00000120	0.23598	5.02289	0.295932	0.888263	aly-1 encodes an RRM motif-containing protein required for normal export of TRA-1/tra-2 mRNA complexes, and thus for normal hermaphroditism; ALY-1 is orthologous to human THOC4 (OMIM:604171), and paralogous to ALY-2 and ALY-3; in the absence of TRA-1, and in conjunction with NXF-2, ALY-1 and its paralog ALY-2 are required to bind the TRE 3' UTR element of tra-2 mRNA, and block tra-2 mRNA's export…
F23B2.6	aly-2	WBGene00000121	0.545658	4.43784	0.00266719	0.0403964	aly-2 encodes an RRM motif-containing protein required for normal export of TRA-1/tra-2 mRNA complexes, and thus for normal hermaphroditism; ALY-2 is orthologous to human THOC4 (OMIM:604171), and paralogous to ALY-1 and ALY-3; in the absence of TRA-1, and in conjunction with NXF-1, ALY-2 and its paralog ALY-1 are required to bind the TRE 3' UTR element of tra-2 mRNA, and block tra-2 mRNA's export…
M18.7	aly-3	WBGene00000122	0.0996884	7.10617	0.501589	1	aly-3 encodes an RRM motif-containing protein orthologous to human THOC4 (OMIM:604171), and paralogous to ALY-1 and ALY-2; by orthology, ALY-3 is thought to promote recruitment of mRNA export factor to mRNAs; however, ALY-3 has no grossly obvious function in four-way RNAi assays of ALY-1/-3 and W04D2.6, and aly-3(RNAi) had no obvious effect on nuclear retention of tra-2 mRNA in the absence of TRA…
F36A4.7	ama-1	WBGene00000123	0.156651	7.38504	0.34189	0.926028	ama-1 encodes the large subunit of RNA polymerase II required for mRNA transcription; AMA-1 is essential for proper embryonic development, particularly for the early division and migration of the endodermal precursor (E) cells that initiate gastrulation; AMA-1 is expressed ubiquitously in the developing embryo until the 550-cell stage.
F55D10.1	aman-1	WBGene00018877	-0.0263758	2.65136	0.922389	1	aman-1 encodes an ortholog of human lysosomal mannosidase (MAN2B1; OMIM:609458, mutated in alpha-mannosidosis); AMAN-1 is predicted to help digest glycoproteins by removing mannose residues from their N-linked oligosaccharides; AMAN-1 has seven predicted N-glycosylation sites; AMAN-1 is biochemically active in vitro, has optimal activity at pH 4-4.5, and is unaffected by Co(II); however, AMAN-1 e…
F58H1.1	aman-2	WBGene00010284	-0.183877	6.997	0.337712	0.923062	aman-2 encodes an alpha-mannosidase II, homologous to human MAN2A1 (OMIM:154582) and MAN2A2, that is required for normal N-glycan structures and predicted to act in the Golgi; AMAN-2 is predicted to mature glycoproteins by removing mannose residues from their N-linked oligosaccharides; translational fusions of AMAN-2 with GFP are subcellularly localized in a pattern consistent with Golgi function…
F48C1.1	aman-3	WBGene00018594	0.194988	4.56946	0.269067	0.853916	aman-3 encodes a Co(II)-activated alpha-mannosidase II, orthologous to human MAN2C1; AMAN-3 is predicted to remove mannose residues from the N-linked oligosaccharides of glycoproteins; AMAN-3 contains three predicted N-glycosylation sites; AMAN-3 is biochemically active in vitro, with a pH optimum of 6.5; AMAN-3 requires either Co(II) or Mn(II) for activity, preferring the former ion; since aman-…
C34F11.3	ampd-1	WBGene00016415	-0.365428	8.47303	0.0606461	0.397389
F58G6.1	amph-1	WBGene00010272	0.0119498	5.8923	0.940708	1
C05E11.4	amt-1	WBGene00000133	-0.817408	3.09539	0.0322919	0.263167	amt-1 encodes a transmembrane transporter that by homology, is predicted to transport ammonium ions across the plasma membrane; as loss of amt-1 activity via large-scale RNAi screens does not result in any obvious abnormalities, the precise role of AMT-1 in C. elegans development and/or behavior is not yet known.
F49E11.3	amt-2	WBGene00000134	-0.286595	3.3978	0.100186	0.536468	amt-2 encodes a transmembrane protein that is one of four C. elegans members of the ammonium transporter AMT/Rh family of proteins predicted to function in transport of ammonium ions across the plasma membrane.
M195.3	amt-3	WBGene00000135	-0.15008	4.40157	0.305739	0.898158	amt-3 encodes one of four C. elegans homologs of AMT1 (AT11_ARATH), a high-affinity ammonium transporter from Arabidopsis thaliana; AMT-3 is closely similar to its paralog AMT-2, with somewhat more distant paralogy to AMT-1 and AMT-4.
C05E11.5	amt-4	WBGene00000136	0.574317	3.52427	0.0968861	0.525428	amt-4 encodes a member of the ammonium transporter protein family.
R13G10.2	amx-1	WBGene00000137	0.23467	4.64705	0.101263	0.539538
B0019.1	amx-2	WBGene00000138	0.234808	5.22955	0.192311	0.750209
F25C8.2	amx-3	WBGene00000139	-0.198415	2.61486	0.427716	0.980241
C17H12.13	anat-1	WBGene00015938	-0.177068	5.92329	0.260622	0.844293	anat-1 encodes a protein containing a C-terminal acetyltransferase domain and a protein kinase A phosphorylation site that is a member of the arylalkylamine N-acetyltransferases (AA-NAT) family, and the Gcn5-related N-acetyltransferases (GNAT) superfamily, of proteins; ANAT-1 shows similarity to enzymes involved in melatonin synthesis from serotonin; adult C. elegans exhibit daily fluctuation in …
ZK973.6	anc-1	WBGene00000140	-0.318011	6.76506	0.0778945	0.460572	anc-1 encodes a protein, orthologous to Drosophila MSP 300 and mammalian SYNE1 and SYNE2 proteins; ANC-1 has coiled regions, a nuclear envelope localization domain (the KASH domain) and an actin-binding domain; ANC-1 affects the positioning of nuclei and mitochondria within the cytoskeleton; ANC-1 is expressed in the cytoplasm, but is localized to the nuclear periphery in an UNC-84 dependent mann…
W02G9.5	angl-1	WBGene00020955	0.0413895	3.67602	0.817912	1	angl-1 encodes a deadenylase that is orthologous to members of the Angel family of ribonucleases.
Y49E10.19	ani-1	WBGene00013038	0.359099	5.66497	0.0128373	0.13552	ani-1 encodes one of three C. elegans anillins; ANI-1 activity is required in the early embryo for cortical contractile events, including polar body extrusion, membrane ruffling, and pseudocleavage; at later stages of development, ANI-1 also plays a role in cuticle formation, coordinated locomotion, vulval development, and male tail formation; in regulating cortical events, ANI-1 appears to funct…
K10B2.5	ani-2	WBGene00019608	0.294494	3.24806	0.11459	0.579789	ani-2 encodes one of three C. elegans anillins; ANI-2 activity is required in the syncytial gonad for proper gonad structure and oocyte formation; specifically, ANI-2 appears to be required for maintaining the structure of the rachis, the syncytial compartment of germline cytoplasm that connects developing ooctyes; in the adult gonad, ANI-2 localizes to the surface of the rachis.
Y43F8C.14	ani-3	WBGene00012835	0.172521	3.30795	0.401763	0.969203	ani-3 encodes one of three C. elegans anillins.
B0303.2	anmt-1	WBGene00015124	0.304045	2.75524	0.177553	0.726967
F42A10.3	anmt-2	WBGene00018340	0.299928	5.33453	0.320369	0.910129
T07C12.9	anmt-3	WBGene00011573	-0.149391	6.67088	0.631927	1
F56A8.1	anoh-1	WBGene00010138	-0.0121238	3.39253	0.958359	1
Y57G11C.37	anoh-2	WBGene00013326	-0.253419	4.72542	0.139534	0.643804
T27E9.1	ant-1.1	WBGene00006439	-0.196411	13.5683	0.28103	0.869865	ant-1.1 encodes one of four C. elegans mitochondrial adenine nucleotide transporters; by homology, ANT-1.1 is predicted to facilitate ADP/ATP exchange between the cytosol and mitochondria; ant-1.1 is an essential gene, required for embryogenesis as well as for normal postembryonic body size and adult lifespan; in addition, ANT-1.1 plays a critical role in promoting somatic and germline programmed…
W02D3.6	ant-1.2	WBGene00007057	0.526373	0.478596	0.301287	0.893432	ant-1.2 encodes an ortholog of the human adenine nucleotide translocase ANT genes, the other ANT genes in C. elegans include ant-1.1, ant-1.3 and ant-1.4; by homology, ANT-1.2 is predicted to mediate the exchange of ATP generated in the mitochondria for cytosolic ADP; ANT-1.2 GFP fusion protein is expressed in the seam cells in the larval stage, and in intestine, pharynx and head neurons througho…
K01H12.2	ant-1.3	WBGene00010485	0.0287932	0.193929	0.9838	1	ant-1.3 encodes an ortholog of the human adenine nucleotide translocase ANT genes, the other ANT genes in C. elegans include ant-1.1, ant-1.2 and ant-1.4; by homology, ANT-1.3 is predicted to mediate the exchange of ATP generated in the mitochondria for cytosolic ADP; ANT-1.3 GFP fusion protein is expressed in the intestine and the anterior of the elongating embryo, and in a pair of head neurons …
T01B11.4	ant-1.4	WBGene00020140	0.258832	0.541087	0.669386	1	ant-1.4 encodes an ortholog of the human adenine nucleotide translocase ANT genes, the other ANT genes in C. elegans include ant-1.1, ant-1.2 and ant-1.3; phylogenetic analysis indicates that ant-1.4 is specific to C. elegans, resulting from a recent duplication following the speciation of the common ancestor of C. elegans, C. briggsae, and C. remanei; by homology, ANT-1.4 is predicted to mediate…
C08B6.9	aos-1	WBGene00000142	0.116831	5.46116	0.463266	0.994392	aos-1 encodes the C. elegans ortholog of Saccharomyces cerevisiae Aos1p and human SUMO-1 activating enzyme E1 N subunit; by homology, AOS-1 is predicted to form, with a catalytic subunit, UBA-2, a heterodimeric enzyme that activates the ubiquitin-like protein SMO-1/SUMO in preparation for its covalent attachment to target proteins to regulate their subcellular localization and/or stability; in C.…
T20B5.1	apa-2	WBGene00000161	-0.0458315	6.99957	0.77143	1	apa-2 encodes an adaptin: specifically, it encodes an ortholog of the alpha subunit of adaptor protein complex 2 (AP2); loss of apa-2 activity via RNAi results in defects in receptor-mediated yolk endocytosis and thus, embryonic lethality.
Y71H2B.10	apb-1	WBGene00000160	0.0660469	6.79966	0.668729	1	apb-1 encodes an adaptin: specifically, it encodes an ortholog of the beta1/2 subunit of adaptor protein complex 1 (AP1); loss of abp-1 activity via RNAi results in defects in receptor-mediated yolk endocytosis and thus, embryonic lethality.
R11A5.1	apb-3	WBGene00000163	-0.0323754	6.27627	0.886258	1	apb-3 encodes an adaptin, orthologous to the beta3 subunit of adaptor protein complex 3 (AP-3); based on structural similarity, APB-3 is predicted to be involved in the formation of intracellular transport vesicles, and genetic analyses indicate that apb-3 activity is required for biogenesis of lysosome-related gut granules.
F15H10.3	apc-10	WBGene00000144	0.458872	0.996576	0.194057	0.75303	apc-10 encodes a homolog of the fission yeast anaphase promoting complex subunit APC10; apc-10(RNAi) animals are generally unable to progress through meiotic divisions; initially they produce reduced numbers of viable embryos mixed with inviable embryos, but then show severe germline maintenance defects and become sterile.
F35G12.9	apc-11	WBGene00000145	0.166345	3.37586	0.420189	0.978022	apc-11 encodes an E3 ubiquitin ligase that is orthologous to subunit 11 of the anaphase promoting complex (APC); apc-11 is required for embryonic development past the one-cell stage; APC-11 functions together with the LET-70/UBC-2 E2-conjugating enzyme: purified APC-11 and LET-70 exhibit ubiquitination activity in vitro.
C09H10.7	apc-17	WBGene00007501	-0.0976593	2.67993	0.650202	1
K06H7.6	apc-2	WBGene00000143	-0.125907	4.38588	0.416968	0.975402	apc-2 encodes an ortholog of subunit 2 of anaphase-promoting complex (APC, a cyclin-specific E3 RING ubiquitin ligase); APC-2 and S. cerevisiae's Apc2p have 32% identity in their cullin domains (considered crucial for function), but otherwise share no obvious similarity; inactivating apc-2 with RNAi causes embryos to arrest at the meiotic one-cell stage, implying that APC-2 is required for the me…
W09G10.4	apd-3	WBGene00000162	0.0261951	6.2689	0.863977	1	apd-3 encodes an adaptin: specifically, it encodes an ortholog of the delta subunit of adaptor protein complex 3 (AP-3).
F46F3.4	ape-1	WBGene00000146	0.132944	7.0819	0.467321	0.995159	ape-1 encodes an ortholog of inhibitory p53-interacting protein (iASPP); APE-1 binds CEP-1 in vitro, and shares 38% amino-acid identity in its ankyrin repeats and SH3 domain to iASPP, with many iASPP residues contacting p53 being conserved; RNAi of ape-1 induces CEP-1- and HUS-1-dependent apoptosis in the germline, consistent with inhibition of the CEP-1/HUS-1 DNA damage checkpoint by APE-1 in th…
Y105E8A.9	apg-1	WBGene00000158	0.0401835	6.68817	0.790469	1	apg-1 encodes an adaptin: specifically, it encodes an ortholog of the gamma subunit of adaptor protein complex 1 (AP-1).
VF36H2L.1	aph-1	WBGene00000147	-0.137077	4.86897	0.4198	0.97752	aph-1 encodes an unfamiliar protein predicted to have seven transmembrane domains; APH-1 is a component of the GLP-1/LIN-12 (Notch) pathway, is required maternally for embryonic viability, and also affects morphogenesis, egg laying, germ line proliferation, and translocation of APH-2 to the cell surface; with PEN-2, APH-1 is required for Notch pathway signaling, gamma-secretase cleavage of beta-a…
ZC434.6	aph-2	WBGene00000148	0.000720761	5.02084	0.999131	1	aph-2 encodes an ortholog of nicastrin, which associates with presenilin and membrane-bound Notchl in aph-2 mutants, the specification of pi-cells is compromised.
C42D8.8	apl-1	WBGene00000149	-0.121255	9.06244	0.468308	0.995159	apl-1 encodes two almost identical isoforms orthologous to human Amyloid precursor protein (APP); although native APL-1 is predicted to be membrane-bound until proteolytically cleaved, neuronal expression of a partial N-terminal extracellular region of APL-1 alone, containing either the E1 or the E2 domain, is sufficient for APL-1's normal functions in vivo (molting and morphogenesis, pharyngeal …
F55A12.7	apm-1	WBGene00000150	-0.0471374	6.19127	0.804375	1	The apm-1 gene encodes an adaptin: specifically, it encodes an ortholog of the mu1-II subunit of adaptor protein complex 1 (AP-1).
F53H8.1	apm-3	WBGene00000164	0.245532	4.71534	0.103257	0.545523	apm-3 encodes an adaptin, orthologous to the mu3 subunit of adaptor protein complex 3 (AP-3); APM-3 is also orthologous to human HPS, which when mutated leads to Hermansky-Pudlak syndrome (OMIM:203300); based on structural similarity, APM-3 is predicted to be involved in the formation of intracellular transport vesicles, and genetic analyses indicate that apm-3 activity is required for biogenesis…
T05H10.2	apn-1	WBGene00000151	-0.180433	5.05091	0.424319	0.979709	apn-1 encodes a member of the AP (apurinic or apyrimidinic) endonuclease (endo IV) family of DNA repair enzymes; apn-1 activity is essential for DNA repair and maintaining genome integrity; APN-1 exhibits DNA repair activities including nucleotide incision and 3'- to 5' exonuclease activity; expression of an apn-1 cDNA can complement an apn1apn2tpp1 triply mutant S. cerevisiae strain deficient in…
W03G9.4	app-1	WBGene00000155	-0.0170079	5.49277	0.910032	1
K04G2.8	apr-1	WBGene00000156	-0.282545	6.00129	0.0966664	0.524727	The apr-1 gene encodes an ortholog of human APC (OMIM:175100, mutated in familial adenomatous polyposis) that is required for germline fertility, the control of homeodomain expression (CEH-13 and LIN-39) during embryogenesis and vulval development, and for the migration and elongation of hypodermal cells during embryo morphogenesis; APR-1 is thought to reside in adherens junctions, while also sti…
F29G9.3	aps-1	WBGene00000159	-0.0574073	4.99227	0.721309	1	aps-1 encodes an adaptin: specifically, it encodes an ortholog of the sigma1 subunit of adaptor protein complex 1 (AP-1).
F02E8.3	aps-2	WBGene00000157	0.123533	4.69184	0.493846	1	aps-2 encodes an adaptin: specifically, it encodes an ortholog of the sigma2 subunit of adaptor protein complex 2 (AP2), which mediates endocytosis from the plasma membrane; APS-2 is required for embryonic and larval development and for normal body morphogenesis, but is not required for endocytosis of yolk protein in developing oocytes; APS-2 is expressed in nearly all cells during embryogenesis,…
Y48G8AL.14	aps-3	WBGene00000165	0.19997	2.84431	0.581314	1	aps-3 encodes an adaptin orthologous to the sigma3 subunit of the heterotetrameric adaptor protein complex 3 (AP-3); by homology, APS-3 is predicted to play a role in intracellular membrane trafficking and specifically, may be involved in transport of lysosomal membrane proteins from tubular sorting endosomes to lysosomes; loss of aps-3 activity via large-scale RNAi screens in the sensitized rrf-…
W04G3.4	apt-9	WBGene00000166	-0.00815358	4.33973	0.96404	1	apt-9 gene encodes an ortholog of GGA (Golgi-localizing, gamma-adaptin ear homology, ARF-binding protein), which contains a domain paralogous to the gamma-adaptin subunits of adaptor protein complexes; based on structural similarity, APT-9 may beinvolved in the formation of intracellular transport vesicles.
K06A1.1	aptf-1	WBGene00019424	-0.0353424	2.43534	0.861249	1	aptf-1 encodes one of four C. elegans AP-2-like transcription factors; APTF-1 activity is required in the RIS interneuron for sleep-like quiescence induced by neuropeptide signaling; aptf-1 is expressed in five head interneurons.
Y62E10A.17	aptf-2	WBGene00013383	0.269171	3.08171	0.153654	0.678821	aptf-2 encodes one of four C. elegans AP-2-like transcription factors; loss of aptf-2 activity via RNAi results in larval and embryonic lethality, with multiple spindle and cell division defects seen in the early embryo; large-scale expression studies report that APTF-2 is expressed throughout embryogenesis with notably high expression seen at the anterior of the embryo in early development.
F28C6.2	aptf-3	WBGene00009203	0.150681	1.23455	0.65141	1	aptf-3 encodes one of four C. elegans AP-2-like transcription factors; APTF-3 is ~60% identical to that of APTF-4, which lies adjacent to aptf-3 on chromosome II; loss of aptf-3 activity via large-scale RNAi results in some embryonic lethality and low levels of larval arrest, body morphology defects, and uncoordinated locomotion.
F28C6.1	aptf-4	WBGene00009202	0.762294	2.27687	0.012551	0.133432	aptf-4 encodes one of four C. elegans AP-2-like transcription factors; APTF-4 that is ~60% identical to that of APTF-3 which lies immediately adjacent to aptf-4 on chromosome II; loss of aptf-4 activity via large-scale RNAi experiments results in embryonic and larval lethality.
K08D9.3	apx-1	WBGene00000168	0.30603	3.63242	0.261345	0.844653	apx-1 encodes one of ten C. elegans DSL (Delta, Serrate, LAG-2) proteins, integral transmembrane and secreted proteins that function as signaling ligands for the Notch family receptors GLP-1 and LIN-12; in the 4-cell embryo, maternally supplied APX-1 functions as a GLP-1 ligand for an inductive interaction that specifies the fate of the ABp blastomere; later in embryogenesis, APX-1 is required fo…
F08C6.6	apy-1	WBGene00017244	1.299	7.51767	9.48643e-05	0.00263448	apy-1 encodes a membrane-bound uridine diphosphatase (UDPase, endo-apyrase) orthologous to human CANT1 and paralogous to ZK563.7; APY-1 is required for repression of the unfolded protein response of stressed endoplasmic reticulum (ER), for normally organized pharynx and thin muscle fibers in adults, and for normally high fertility, rapid growth, and long lifespan; apy-1 is transcriptionally activ…
F32A5.5	aqp-1	WBGene00000169	-0.8394	8.1522	0.048072	0.343857	aqp-1 encodes, by alternative splicing, two isoforms of an aquaglyceroporin required for normally short lifespan; AQP-1 expression is upregulated under daf-2(-) conditions, and loss of AQP-1 function in daf-2 mutant animals results in reduced lifespan; AQP-1 increases glycerol permeability five- to seven-fold when expressed in Xenopus oocytes; AQP-1::GFP fusion proteins are expressed predominantl…
ZK1321.3	aqp-10	WBGene00000178	-0.157769	6.40273	0.403507	0.970277	aqp-10 encodes an aquaporin paralogous to AQP-9 and AQP-11; infection with Pseudomonas aeruginosa induces AQP-10 to be intestinally expressed; AQP-10 is orthologous to Drosophila CG12251 and human AQP11(OMIM:609914), AQP12A(OMIM:609789), and AQP12B.
ZK525.2	aqp-11	WBGene00000179	0.285795	5.49792	0.214243	0.784437	aqp-11 encodes a putative aquaporin with no function in mass RNAi assays, perhaps reflecting genetic redundancy with its paralogs AQP-9 and AQP-10; AQP-11 is orthologous to Drosophila CG12251 and human AQP11 (OMIM:609914), AQP12A (OMIM:609789), and AQP12B.
Y57A10A.35	aqp-12	WBGene00013272	-0.105584	1.2832	0.783617	1	aqp-12 encodes a divergent aquaporin homolog.
C01G6.1	aqp-2	WBGene00000170	-0.419827	8.76433	0.00883488	0.102361	aqp-2 encodes, by alternative splicing, two isoforms of an biochemically atypical aquaglyceroporin; when expressed in Xenopus oocytes, AQP-2 increases water permeability 5- to 11-fold, and urea permeability 4.5-fold, but has no effect on glycerol permeability; AQP-2::GFP fusion proteins are expressed predominantly in the excretory cell and more weakly in muscle, motor neurons, and hypodermis; AQP…
Y69E1A.7	aqp-3	WBGene00000171	0.177226	-0.0332879	0.813871	1	aqp-3 encodes an aquaglyceroporin whose expression in Xenopus oocytes increases water or glycerol permeability five- to seven-fold; loss of AQP-3 activity via mutation or RNAi results in no obvious defects; however, AQP-3, in conjunction with AQP-2, AQP-4, and AQP-8, is weakly required for recovery from hypotonic stress; AQP-3 is expressed in the intestine, excretory cell, seminal vesicle, and va…
F40F9.9	aqp-4	WBGene00000172	0.0814403	5.23567	0.750094	1	aqp-4 encodes an aquaporin whose expression in Xenopus oocytes increases water permeability 5- to 10-fold; loss of AQP-4 activity via mutation or RNAi results in no obvious defects; however, AQP-4, in conjunction with AQP-2, AQP-3, and AQP-8, is weakly required for recovery from hypotonic stress; AQP-4 is expressed in the apical membrane of intestine; AQP-4 is paralogous to AQP-5 and AQP-6, and o…
C35A5.1	aqp-5	WBGene00000173	-0.452635	2.23708	0.0436351	0.321215	aqp-5 encodes a putative aquaporin with no known substrate, since AQP-5 expressed in Xenopus oocytes has no effect on water, glycerol, or urea permeability; AQP-5 also has no function in mass RNAi assays, perhaps reflecting genetic redundancy with its paralogs AQP-4 and AQP-6; AQP-5 is expressed in I1 and I2 pharyngeal interneurons, and is orthologous to human AQP8 (OMIM:603750).
C32C4.2	aqp-6	WBGene00000174	-0.575608	2.58294	0.0330191	0.266941	apq-6 encodes an aquaporin whose expression in Xenopus oocytes increases water permeability five- to seven-fold; AQP-6 is expressed in the cilia and cell bodies of IL1 sensory neurons; AQP-6 is orthologous to human AQP8 (OMIM:603750).
M02F4.8	aqp-7	WBGene00000175	0.0450038	8.06888	0.892596	1	aqp-7 encodes an aquaglyceroporin whose expression in Xenopus oocytes increases either water or glycerol permeability five- to seven-fold; AQP-7 has no function in mass RNAi assays, perhaps reflecting genetic redundancy with its several paralogs; AQP-7 is expressed in muscle punctae (perhaps focal adhesions).
K02G10.7	aqp-8	WBGene00000176	0.996272	6.78685	0.00238071	0.0371062	aqp-8 encodes, by alternative splicing, two isoforms of a putative aquaglyceroporin with no known substrate, since AQP-8 expressed in Xenopus oocytes has no effect on water, glycerol, or urea permeability; loss of AQP-8 activity via mutation or RNAi results in no obvious defects; however, AQP-8, in conjunction with AQP-2, AQP-3, and AQP-4, is weakly required for recovery from hypotonic stress; AQ…
K07A1.16	aqp-9	WBGene00000177	0.0138402	4.36455	0.960583	1	aqp-9 encodes a putative aquaporin with no function in mass RNAi assays, perhaps reflecting genetic redundancy with its paralogs AQP-10 and AQP-11; AQP-9 is orthologous to Drosophila CG12251 and human AQP11 (OMIM:609914), AQP12A (OMIM:609789), and AQP12B.
ZK1320.6	arc-1	WBGene00000180	-0.14723	5.7509	0.341182	0.925679	arc-1 encodes a member of the ARL (ADP-ribosylation factor(ARF)-like) family of proteins which are very similar to ARF proteins but lack the ability to stimulate ADP ribosylation by cholera toxin; arc-1 has a human homolog, MID1, which when mutated leads to Opitz syndrome (OMIM:300000).
F01G4.2	ard-1	WBGene00000181	-0.192231	7.03412	0.260855	0.844619	ard-1 encodes a homolog of mammalian 3-hydroxyacyl-CoA dehydrogenase (HADH II)/amyloid-beta binding alcohol dehydrogenase (ABAD) that is predicted to be mitochondrial.
F45E4.1	arf-1.1	WBGene00000190	0.18861	1.49004	0.748352	1	arf-1.1 encodes a member of the ADP-ribosylation factor family.
B0336.2	arf-1.2	WBGene00000182	0.260179	8.70412	0.198062	0.758974	arf-1.2 encodes an ADP-ribosylation factor homolog required in vivo for embryonic development, fertility, locomotion, vulval development, and cuticular synthesis; ARF proteins are N-myristoylated GTPases that regulate membrane traffic and the actin cytoskeleton, and that activate both phospholipase D1 (PLD1) and phosphatidylinositol 4-phosphate 5-kinase.
F57H12.1	arf-3	WBGene00000183	0.0474157	8.05961	0.783701	1	arf-3 encodes a member of the ADP-ribosylation factor related protein family; likely expressed in touch receptors and regulated by MEC-3.
Y116A8C.12	arf-6	WBGene00000184	-0.0168564	4.48527	0.915909	1	arf-6 encodes a small GTP-binding protein of the ADP-ribosylation factor (ARF) family that is orthologous to vertebrate ARF6; by homology, ARF-6 is predicted to function as a GTPase that regulates receptor-mediated endocytosis, and in C. elegans, ARF-6 is strongly expressed in the coelomocytes (highly endocytic cells located in the pseudocoelom) where it colocalizes in the cytoplasm and to a less…
F31A9.3	arg-1	WBGene00000185	0.191542	1.61283	0.726628	1	arg-1 encodes a member of the Delta/Serrate/LAG-2 family of transmembrane signaling ligands; arg-1 mediates cell fate decisions during early embryogenesis and in addition, is a downstream target of HLH-8/CeTwist, which binds E box sequences in the arg-1 promoter and is required for fate specification of a subset of mesodermal cells; arg-1 is closely related to apx-1 and lag-2 and is functionally …
C27A12.8	ari-1	WBGene00016158	0.0731644	6.05427	0.624373	1
Y108G3AL.7	arid-1	WBGene00044689	0.0847321	5.86366	0.678127	1
C01C7.1	ark-1	WBGene00000186	0.103793	6.22257	0.477347	0.999015	ark-1 encodes a homolog of the nonreceptor tyrosine kinase ACK which inhibits signalling through the EGF receptor homolog LET-23, both in (RAS-dependent) vulval development and in (RAS-independent) ovulation.
F54C9.10	arl-1	WBGene00000187	0.0473671	5.53094	0.795739	1	arl-1 encodes a member of the GTP-binding ADP-ribosylation factor family; Arl1 is an essential gene in Drosophila but not in S. cerevisiae; arl-1 is expressed in head neurons, the ventral nerve cord and the intestine.
Y37E3.5	arl-13	WBGene00021349	-0.0673603	2.73335	0.746472	1	arl-13 encodes the ortholog of human Arl13b which encodes the small ciliary G protein, adenosine diphosphate ribosylation factor-like protein; arl-13 is required for normal ciliary morphology and function and intraflagellar transport (IFT), arl-13 functions with the small GTPase, arl-3 for the stability of the IFT complex; arl-13 also interacts genetically with IFT-related genes like nphp-4, klp-…
F19H8.3	arl-3	WBGene00000188	0.0688459	3.89821	0.713291	1	arl-3 encodes a member of the ARL (ADP-ribosylation factor(ARF)-like) family of proteins which are very similar to ARF proteins but lack the ability to stimulate ADP ribosylation by cholera toxin; an arl-3 deletion allele, tm1703, results in essentially wild-type animals that display slight defects in male mating behavior; ARL-3::GFP reporter fusions are expressed in ciliated neurons, where they …
ZK632.8	arl-5	WBGene00000189	-0.171032	3.15222	0.399093	0.966622	arl-5 encodes a paralog of the ADP-ribosylation factor-like protein EVL-20; ARL-5 is an ortholog of mammalian ARL5.
C38D4.8	arl-6	WBGene00000193	-0.0477557	2.07869	0.846992	1	arl-6 encodes an ADP-Ribosylation factor-Like member of the Ras superfamily of small GTP-binding proteins and is a predicted homolog of the human ARL6 gene, identified as the gene that underlies Bardet-Biedl syndrome type 3; GFP-tagged ARL-6 undergoes intraflagellar transport (IFT) in the ciliary axoneme, implicating ARL-6 in ciliary transport; arl-6 is expressed in amphid and phasmid ciliated se…
F20D1.5	arl-7	WBGene00000191	0.248982	2.27648	0.445646	0.988393
Y57G11C.13	arl-8	WBGene00000192	0.00649041	6.6897	0.971012	1	arl-8 encodes an Arf-like small GTPase and is highly conserved among multicellular organisms; arl-8 regulates transport of axonal presynaptic vesicle protein cargo, most likely by preventing vesicle aggregation; arl-8 is involved in endosome to lysosome transport, by promoting late endosome-lysosome fusion; arl-8 is also required for proper embryonic development; arl-8 associates with synaptic ve…
Y53F4B.22	arp-1	WBGene00013168	0.151592	6.26027	0.337477	0.922699
C49H3.8	arp-11	WBGene00016793	-0.0747629	4.61574	0.627031	1
C08B11.6	arp-6	WBGene00007434	-0.0118886	4.5467	0.947178	1
F53H8.2	arr-1	WBGene00000195	0.0479632	4.96235	0.747351	1	arr-1 encodes the C. elegans beta-arrestin ortholog (OMIM:107940, 107941, mice lacking beta-arrestin family members display defects in G protein-coupled receptor desensitization); by homology, ARR-1 is predicted to be a multifunctional adaptor protein that interacts with intracellular signaling molecules as well as activated and phosphorylated G protein-coupled and TGF-beta receptors to: 1) downr…
T04B8.3	arrd-1	WBGene00020205	0.937715	2.02342	0.0148132	0.150364
F58G1.6	arrd-10	WBGene00010268	0.507178	1.91791	0.120429	0.597711
R06B9.1	arrd-11	WBGene00011052	-1.04455	3.67993	0.00128744	0.0226485
R06B9.2	arrd-12	WBGene00011053	0.0900691	0.00537956	0.915545	1
R06B9.3	arrd-13	WBGene00011054	-0.149245	4.1483	0.541262	1
R06B9.4	arrd-14	WBGene00011055	-0.49933	5.35714	0.00216377	0.0345254
ZK643.1	arrd-15	WBGene00014033	0.0426448	3.944	0.797894	1
Y49E10.24	arrd-16	WBGene00013043	0.446262	2.48768	0.0844928	0.481824
T12D8.4	arrd-17	WBGene00011732	-0.339601	6.80308	0.0357721	0.281321
F35F10.11	arrd-18	WBGene00018060	-0.293571	4.05602	0.162933	0.69697
F35F10.12	arrd-19	WBGene00018061	-0.172621	4.06479	0.302921	0.895402
Y51B9A.4	arrd-2	WBGene00013086	0.916597	1.75037	0.0633309	0.407207
C04E12.11	arrd-20	WBGene00015440	0.0272276	1.30381	0.964115	1
C04E12.12	arrd-21	WBGene00015441	-0.188172	3.03552	0.304457	0.896461
T20D4.6	arrd-22	WBGene00020612	-0.161385	2.46929	0.545822	1
T07F12.3	arrd-23	WBGene00020323	0.129333	1.02175	0.717084	1
F48F7.7	arrd-24	WBGene00009852	0.866321	0.939057	0.0274214	0.234575
C04C11.2	arrd-25	WBGene00007296	-0.0343592	6.95104	0.838103	1
R05C11.1	arrd-26	WBGene00019873	-0.126822	3.6103	0.463149	0.994392
F48F7.8	arrd-27	WBGene00009853	0.97606	-0.522547	0.129875	0.621364
F21A10.4	arrd-28	WBGene00009000	-0.139712	2.47733	0.553697	1
M176.1	arrd-3	WBGene00006429	0.350189	0.486532	0.649744	1	tag-50 encodes a predicted member of the arrestin family.
ZK938.2	arrd-4	WBGene00014159	-0.256868	4.32947	0.0696259	0.429899
ZK938.4	arrd-5	WBGene00014161	-0.330684	1.53287	0.255579	0.840647
F40F8.8	arrd-6	WBGene00009579	-0.00227668	4.88937	0.993685	1
Y17G7B.11	arrd-7	WBGene00012464	0.477315	3.25613	0.0694146	0.429036
Y17G7B.14	arrd-8	WBGene00012467	-0.0158235	0.99807	0.982388	1
F15A4.9	arrd-9	WBGene00008843	0.689473	0.0735773	0.438369	0.98536
C15F1.6	art-1	WBGene00000198	-0.0262138	7.3702	0.903571	1	a protein similar to synaptic glycoprotein SC2 from mammals.
Y71F9AL.16	arx-1	WBGene00000199	0.0411755	7.1515	0.811438	1	arx-1, also called as Arp-3, encodes a subunit of the actin-related protein of the conserved Arp2/3 complex with 60% amino acid similarity to the homologous genes from human (OMIM: 604222); arx-1 is an essential gene as disruption in the expression by RNAi results in embryonic arrest due to ventral enclosure defects during morphogenesis; in Arp2/3-depleted embryos, the leading edge of the migrati…
K07C5.1	arx-2	WBGene00000200	-0.0593349	6.83871	0.702768	1	arx-2 also called as Arp-2 encodes a subunit of the actin related protein of the conserved Arp2/3 complex, with 60% amino acid similarity with the homologous genes from human (OMIM: 604221); arx-2 is an essential gene as disruption in the expression by RNAi results in embryonic arrest due to ventral enclosure defects during morphogenesis; Arp2/3 depletion results in partial shrinking of the Ea/p …
Y79H2A.6	arx-3	WBGene00000201	-0.0272591	6.79444	0.856791	1	arx-3 also called as p41Arc encodes a subunit of the actin related protein of the conserved Arp2/3 complex, with 60% amino acid similarity with the homologous genes from human (OMIM: 604223); arx-3 is an essential gene as disruption in the expression by RNAi results in embryonic arrest due to ventral enclosure during morphogenesis; Arp2/3 depletion results in partial shrinking of the Ea/p apical …
Y6D11A.2	arx-4	WBGene00021170	0.0378963	5.94426	0.82323	1	arx-4 also called as p34Arc encodes a subunit of the actin related protein of the conserved Arp2/3 complex, with 60% amino acid similarity with the homologous genes from human (OMIM: 604224); arx-4 is an essential gene as disruption in the expression by RNAi results in embryonic arrest due to ventral enclosure during morphogenesis; Arp2/3 depletion results in partial shrinking of the Ea/p apical …
Y37D8A.1	arx-5	WBGene00000203	0.016547	5.16204	0.937723	1	arx-5 also called as p21Arc encodes a subunit of the actin related protein of the conserved Arp2/3 complex, with 60% amino acid similarity with the homologous genes from human (OMIM: 604225); arx-5 is an essential gene as disruption in the expression by RNAi results in embryonic arrest due to ventral enclosure during morphogenesis; Arp2/3 depletion results in partial shrinking of the Ea/p apical …
C35D10.16	arx-6	WBGene00000204	-0.0233546	5.67859	0.893757	1	arx-6 also called as p20Arc p21Arc encodes a subunit of the actin related protein of the conserved Arp2/3 complex, with 60% amino acid similarity with the homologous genes from human (OMIM:604226); arx-6 is an essential gene as disruption in the expression by RNAi results in embryonic arrest due to ventral enclosure during morphogenesis; Arp2/3 depletion results in partial shrinking of the Ea/p a…
M01B12.3	arx-7	WBGene00000205	0.177165	5.35061	0.371756	0.952323	arx-7 also called as p16Arc encodes a subunit of the actin related protein of the conserved Arp2/3 complex, with 60% amino acid similarity with the homologous genes from human (OMIM: 604227); arx-7 is an essential gene as disruption in the expression by RNAi results in embryonic arrest due to ventral enclosure during morphogenesis; Arp2/3 depletion results in partial shrinking of the Ea/p apical …
K11D2.2	asah-1	WBGene00010769	-0.443613	6.11951	0.126633	0.613305	K11D2.2 is orthologous to the human gene N-ACYLSPHINGOSINE AMIDOHYDROLASE (ASAH; OMIM:228000), which when mutated leads to Farber lipogranulomatosis.
F35G12.10	asb-1	WBGene00000206	0.289892	4.82101	0.0825913	0.475028	asb-1 encodes the B subunit of the membrane-bound F0 proton channel portion of ATP synthase (mitochondrial respiratory chain [MRC] complex V) that is closely similar to its paralog ASB-2; asb-1 activity is required for embryonic viability and for normal proliferation of germline cells, specifically their progression to meiosis; in addition, asb-1 is required for response to hermaphrodite contact,…
F02E8.1	asb-2	WBGene00000207	-0.188274	9.38626	0.301339	0.893432	asb-2 encodes the B subunit of the membrane-bound F0 proton channel portion of ATP synthase (mitochondrial respiratory chain [MRC] complex V) that is closely similar to its paralog ASB-1; RNAi experiments indicate that asb-2 activity is required for larval development as well as for normal body morphology, lifespan, and growth rate.
Y53F4B.15	asc-1	WBGene00000208	-0.167372	5.2601	0.352211	0.934032	asc-1 encodes a homolog of human activating signal cointegrator-1 and affects long-term survival and longivity in adults and daur larvae.
R74.5	asd-1	WBGene00011279	-0.0968099	6.44454	0.520116	1	asd-1 encodes an ortholog of human RBM9 et al., and paralog of FOX-1 and SPN-4; ASD-1 isoforms have an RNA recognition motif and 1-2 glutamine/asparagine-rich domains; ASD-1 and FOX-1 both bind a site in egl-15 mRNA that is required to repress exon 5B splicing into mature mRNA; ASD-1 alone is partly required for exon 5A expression in muscle cells, while FOX-1 alone is dispensable for it; double a…
T21G5.5	asd-2	WBGene00006423	-0.0121147	6.88937	0.944155	1	asd-2 encodes, by alternative splicing, three isoforms of a signal transduction and activation of RNA (STAR protein) orthologous to human QKI (OMIM:609590) and Drosophila HOW, and paralogous to C. elegans GLD-1; ASD-2 is required for normal axonal guidance, developmentally regulated mRNA splicing, and correct protein folding in vivo; ASD-2 is required for the mutually exclusive splicing of let-2 …
C03D6.5	asfl-1	WBGene00007277	0.97219	1.26495	0.0242524	0.214881
K07A12.3	asg-1	WBGene00000209	0.0456769	6.34493	0.867219	1	asg-1 encodes a homolog of the proton-translocating F0 ATP synthase complex subunit g; by homology, ASG-1 is predicted to function in ATP synthesis, although its precise role in ATP anabolism is not yet known; in C. elegans, asg-1 activity is required for transposon silencing in the germline, suggesting that healthy energy metabolism is necessary for this process; in addition, large-scale RNAi sc…
C53B7.4	asg-2	WBGene00000210	-0.18265	8.21867	0.449307	0.988736	asg-2 encodes a homolog of subunit G of the membrane-bound F0 proton channel portion of ATP synthase (mitochondrial respiratory chain [MRC] complex V); asg-2 activity is required for growth at a normally high rate and for normal osmoregulation; in addition, asg-2 activity is required for response to hermaphrodite contact, the first step in a series of stereotypical male mating behaviors; an ASG-2…
Y17G7B.2	ash-2	WBGene00012458	-0.0569991	6.05105	0.700177	1	ash-2 encodes the C. elegans ortholog of Drosophila Ash2, a trithorax group protein that is a member of the conserved H3K4 trimethylation (H3K4me3) complex; in C. elegans, loss of ash-2 via RNAi results in reduced levels of H3K4me3 at L3 larval stages indicating that ASH-2 functions in H3K4 trimethylation; ASH-2 also functions in the C. elegans germline to negatively regulate lifespan; in additio…
ZK770.1	asic-1	WBGene00022815	0.142285	3.25932	0.500216	1
T28F4.2	asic-2	WBGene00012137	0.101484	2.7914	0.667324	1
B0252.2	asm-1	WBGene00000211	0.638521	3.04428	0.00355538	0.0502896	asm-1 encodes a protein similar to human acid sphingomyelinase (ASM) or sphingomyelin phosphodiesterase; the ASM-1 protein has a putative secretory signal peptide at the N-terminus, saposin-like and proline-rich domains and putative N-linked glycosylation sites; asm-1 shows phosphodiesterase activity when expressed in COS-7 cells; while mammalian ASM is detected as both intracellular and secreted…
ZK455.4	asm-2	WBGene00000212	-0.160619	5.06759	0.605083	1	asm-2 encodes a protein similar to human acid sphingomyelinase (ASM) or sphingomyelin phosphodiesterase 1; the ASM-2 protein has a putative secretory signal peptide at the N-terminus, saposin-like and proline-rich domains and putative N-linked glycosylation sites; asm-2 shows phosphodiesterase activity when expressed in COS-7 cells; like mammalian ASM, asm-2 is probably both intracellular and sec…
W03G1.7	asm-3	WBGene00000213	0.0437048	2.18854	0.955646	1
ZK637.5	asna-1	WBGene00014025	-0.171836	6.84934	0.406372	0.972235	asna-1 encodes a putative membrane transporter that is required, non-cell-autonomously, for L1 larvae to proceed through development when fed, and is also required for normal insulin (DAF-28) secretion; the human ASNA1 ortholog stimulates insulin secretion in pancreatic beta cells, and can transgenically rescue asna-1 mutant C. elegans, suggesting that ASNA-1's function is conserved among metazoa…
F47G3.2	asna-2	WBGene00018577	0.0236185	2.97794	0.911577	1
F25G6.6	asns-1	WBGene00003816	0.375829	5.21433	0.0777702	0.460572	asns-1 encodes a predicted asparagine synthase (glutamine-hydrolysing); ASNA-1 is predicted to catalyze the synthesis of L-asparagine from L-aspartate.
M02D8.4	asns-2	WBGene00019730	0.113121	7.99307	0.714352	1
Y39B6A.20	asp-1	WBGene00000214	-0.0954031	10.3688	0.747136	1	asp-1 encodes a homolog of cathepsin D aspartic protease; it is transcribed exclusively in intestinal cells of the late embryo and early larvae and is not observed in older larvae or adults; ASP-1 is dispensable for neuronal degeneration.
C15C8.3	asp-10	WBGene00007605	2.07619	7.38358	3.13299e-08	2.73986e-06
F21F8.2	asp-11	WBGene00017677	-0.0503262	-0.544363	0.96669	1
F21F8.4	asp-12	WBGene00017678	-0.153058	4.87502	0.597754	1
F28A12.4	asp-13	WBGene00017881	-0.198776	8.65672	0.556655	1
K10C2.3	asp-14	WBGene00019619	0.293087	6.27165	0.208999	0.777736	asp-14 encodes an aspartyl protease.
Y39B6A.22	asp-15	WBGene00012681	0.178225	0.0929694	0.799892	1
Y39B6A.23	asp-16	WBGene00012682	0.301935	0.694646	0.605854	1
Y39B6A.24	asp-17	WBGene00012683	0.259503	0.571012	0.741669	1
T18H9.2	asp-2	WBGene00000215	0.223907	9.01008	0.299935	0.891909	asp-2 encodes aspartic protease.
H22K11.1	asp-3	WBGene00000216	-0.0813672	9.97604	0.651341	1	asp-3 encodes an aspartyl protease homolog that is required, in parallel with ASP-4 but downstream of CLP-1 and TRA-3, for degenerative (necrotic-like) cell death in neurons induced by mutations such as mec-4(d), deg-3(d), or gsa-1(gf).
R12H7.2	asp-4	WBGene00000217	-0.385289	7.94643	0.0500242	0.352827	asp-4 encodes an aspartyl protease homolog that is required, in parallel with ASP-3 but downstream of CLP-1 and TRA-3, for degenerative (necrotic-like) cell death in neurons induced by mutations such as mec-4(d), deg-3(d), or gsa-1(gf).
F21F8.3	asp-5	WBGene00000218	-0.0624837	9.79716	0.749848	1
F21F8.7	asp-6	WBGene00000219	-0.384203	11.5178	0.0611627	0.399622	aspartic protease.
F59D6.2	asp-7	WBGene00019104	0.0523827	0.334174	0.964907	1
F59D6.3	asp-8	WBGene00019105	-0.00826871	3.83999	0.980522	1
C11D2.2	asp-9	WBGene00015700	-0.0858609	2.54546	0.725042	1
C45G3.1	aspm-1	WBGene00008107	0.464753	3.73231	0.0044825	0.0611677	aspm-1 encodes a protein, with one N-terminal calponin-homology domain and two IQ calmodulin-binding domains, that is orthologous to Drosophila Asp (Abnormal Spindles) and to human ASPM (OMIM:605481), which when mutated leads to primary microcephaly; in C. elegans, ASPM-1 is required for the forces that regulate meiotic spindle rotation in meiosis I and II and for proper meiotic spindle organizat…
T08H4.3	ast-1	WBGene00020368	-0.326701	5.0452	0.0330748	0.267154	ast-1 encodes one of ten C. elegans ETS-box transcription factors; AST-1 is required cell autonomously for proper initiation and maintenance of dopamine (DA) neuron fate; AST-1 acts to specify DA neuron fate by positively regulating expression of a number of DA neuron-specific genes such as dat-1 and cat-2, which encodes a dopamine transporter and tyrosine hydroxylase, respectively; AST-1 is also…
F54B3.3	atad-3	WBGene00010015	0.163972	5.83899	0.32655	0.914143	atad-3 encodes the ortholog of the vertebrate mitochondrial protein ATAD3; both vertebrate and elegans ATAD-3 contain the conserved AAA (ATPases associated with a variety of cellular activities) domain; atad-3 is required for normal mitochondrial morphology and activity as atad-3 mutants show reduced complex I and citrate synthase activities; atad-3 is also required for embryonic and larval devel…
W06B11.1	atat-2	WBGene00021059	0.113599	4.28584	0.476491	0.998594	atat-2 encodes an alpha-tubulin acetyltransferase; atat-2 functions redundantly with its paralog, MEC-17, for acetylation of K40 on MEC-12 alpha-tubulin, an alpha-tubulin enriched in the touch receptor neurons.
K08F8.2	atf-2	WBGene00000220	0.665126	2.60358	0.0539016	0.369989	atf-2 encodes a cAMP-dependent transcription factor paralogous to CES-2, a bZip-like transcription factor that plays a key role in regulation of apoptosis; atf-2 activity is required for excretory duct cell development and essential for embryonic development; in regulating excretory duct cell development, ATF-2 controls expression of lin-48; in vitro, ATF-2 binds the regulatory regions of LIN-48 …
T04C10.4	atf-5	WBGene00000221	0.208261	7.39866	0.237647	0.818919	atf-5 encodes a homolog of the mammalian bZIP transcription factors ATF4 and ATF5, analogous to GCN4 in S. cerevisiae; like like ATF4 and GCN4, atf-5 has an extensive 5' UTR with one 37-residue uORF; ATF4 is poorly translated in unstressed cells but well-translated during ER stress, amino acid starvation, or arsenite treatment; possibly atf-5 is also translationally regulated in a way similar to …
F45E6.2	atf-6	WBGene00000222	-0.616949	5.80249	0.00123182	0.0218177	atf-6 is an ortholog of mammalian ATF6alpha, a proximal sensor required for the unfolded protein response (UPR) in the endoplasmic reticulum (ER); ATF6alpha is a transmembrane protein, with a bZIP transcription factor domain in its cytosolic amino terminus that is released and activated by proteolytic cleavage upon ER stress; either ire-1 or xbp-1 deletions are synthetically lethal with atf-6 or …
C07G2.2	atf-7	WBGene00000223	-0.016628	8.35308	0.920879	1	atf-7 encodes a basic-region leucine zipper (bZIP) transcription factor orthologous to members of the ATF2/ATF7/CREB5 family of cyclic AMPresponse element binding (CREB)/activating transcription factors (ATFs); ATF-7 plays a key role in the innate immune response by regulating the expression of immune genes downstream of PMK-1/p38 MAPK; ATF-7 is likely converted from a transcriptional repressor t…
F17A9.3	atf-8	WBGene00017535	0.746246	-0.000947171	0.167877	0.707073
ZC376.7	atfs-1	WBGene00013878	0.19771	6.90922	0.238713	0.820453	atfs-1 encodes a bZip transcription factor; ATFS-1 is required for the mitochondrial unfolded protein response (UPRmt); in wild-type animals, ATFS-1 is imported into the mitochondria and degraded, but in response to perturbed mitchondrial protein folding and decreased mitochondrial import efficiency, some ATFS-1 accumulates in the cytosol and then, traffics to the nucleus.
D2085.2	atg-10	WBGene00008427	0.398203	0.0246468	0.4532	0.990719
T08A9.1	atg-11	WBGene00020334	-0.00408876	6.38372	0.982629	1	atg-11 encodes a coiled-coil protein orthologous to the human gene LIKELY ORTHOLOG OF MOUSE COILED COIL FORMING PROTEIN 1 (RB1CC1; OMIM:606837), which when mutated leads to disease; during embryogenesis, ATG-11 functions as a scaffolding protein to mediate autophagic degradation of selective protein aggregates, such as those containing SQST-1, with which ATG-11 physically interacts; ATG-11 is, ho…
D2007.5	atg-13	WBGene00017045	-0.0137013	6.03848	0.944842	1	atg-13 encodes a divergent ortholog of the autophagic budding yeast protein Atg13p, and a more obvious ortholog of uncharacterized but well-conserved metazoan proteins such as human KIAA0652; ATG-13 is expressed broadly in early (pre-100-cell stage) embryos, in larval and adult ventral nerve cord and other neurons, and in adult pharyngeal muscle.
F02E8.5	atg-16.1	WBGene00017178	0.147171	4.39005	0.502621	1	atg-16.1 encodes a divergent ortholog of the autophagic budding yeast protein Atg16p, and of human ATG16L1 (OMIM:610767, associated with Crohn disease) and ATG16L2; ATG-16.1 is paralogous to ATG-16.2; ATG-16.1 is expressed in larval and adult intestine, renal gland cells, stomato-intestinal muscle, anal depressor muscle, and head mesodermal cell.
K06A1.5	atg-16.2	WBGene00019427	-0.220188	6.00611	0.371039	0.952065	atg-16.2 encodes a divergent ortholog of the autophagic budding yeast protein Atg16p, and of human ATG16L1 (OMIM:610767, associated with Crohn disease) and ATG16L2; ATG-16.2 is paralogous to ATG-16.1; ATG-16.2 has no obvious function in mass RNAi assays.
F41E6.13	atg-18	WBGene00018294	-0.0929112	7.81783	0.579716	1	atg-18 encodes, by alternative splicing, two isoforms of a WD40 repeat-containing protein orthologous to the autophagic budding yeast protein Atg18p, and to human WIPI1 (OMIM:609224) and WIPI2 (OMIM:609225); ATG-18 activity is essential for normal dauer morphogenesis and autophagy in daf-2 mutant animals; ATG-18 is expressed in larval and adult pharynx, bodywall muscle, hypodermis, seam cells, an…
M03A8.2	atg-2	WBGene00019748	0.0529488	7.87722	0.795998	1	atg-2 encodes a large (2,275-residue) protein orthologous to the autophagic budding yeast protein Atg2p, and to human ATG2A and ATG2B; ATG-2 is expressed in larval and adult pharynx, intestine, body wall muscles, and neurons, as well as adult reproductive system; ATG-2 has no obvious phenotype in mass RNAi assays.
Y55F3AM.4	atg-3	WBGene00021922	0.0915001	5.66526	0.565046	1	atg-3 encodes an ortholog of the autophagic budding yeast protein Atg3p, and of human ATG3 (OMIM:609606); ATG-3 is expressed in larval and adult pharynx and body wall muscle, and in adult reproductive system, vulval muscle, spermetheca, and seam cells; ATG-3 has no obvious phenotype in mass RNAi assays.
Y87G2A.3	atg-4.1	WBGene00013595	0.152979	5.58172	0.265356	0.850445	atg-4.1 encodes a putative cysteine protease orthologous to the autophagic budding yeast protein Atg4p, and to human ATG4A and ATG4B; ATG-4.1 is paralogous to ATG-4.2 and to human ATG4C (OMIM:611339) and ATG4D (OMIM:611340); ATG-4.1 is expressed from early embryos to adults, in larval and adult intestine, renal gland cells, and neurons; ATG-4.1 exhibits protease activity towards LGG-1; ATG-4.1 lo…
ZK792.8	atg-4.2	WBGene00014080	-0.258313	3.91106	0.172471	0.717085	atg-4.2 encodes a putative cysteine protease orthologous to the autophagic budding yeast protein Apg4p, and to human ATG4C (OMIM:611339) and ATG4D (OMIM:611340); ATG-4.2 is paralogous to ATG-4.1 and to human ATG4A and ATG4B; unlike C. elegans orthologs of other yeast autophagic proteins, ATG-4.2 is not required for normal dauer formation, and it has no obvious functions in mass RNAi assays.
Y71G12B.12	atg-5	WBGene00022152	0.0352698	5.01631	0.812273	1	atg-5 encodes, by alternative splicing, two isoforms of an ortholog of the autophagic budding yeast protein Atg5p, and of human ATG5 (OMIM:604261); ATG-5 has no obvious function in mass RNAi assays.
M7.5	atg-7	WBGene00010882	-0.0418543	5.79213	0.787545	1	atg-7 encodes an E1 ubiquitin-activating-like enzyme orthologous to the autophagic budding yeast protein Apg7p; ATG-7 is required for normal dauer morphogenesis and autophagy in daf-2 mutant animals.
T22H9.2	atg-9	WBGene00020706	0.148566	5.99572	0.619917	1
C05D11.7	atgl-1	WBGene00015484	-0.124981	6.60603	0.466663	0.995159
F26D10.9	atgp-1	WBGene00000224	0.179844	7.18156	0.298178	0.890179	atgp-1 encodes a predicted amino acid transporter glycoprotein subunit; when co-expressed in Xenopus oocytes with the AAT-1 or AAT-3 catalytic subunit, ATGP-1 is not able to facilitate amino acid uptake, even though ATGP-1 is able to covalently associate with AAT-1 or AAT-3 in the Xenopus expression system; however, when co-expressed with AAT-9, ATGP-1 is able to enhance the activity of this cata…
C38C6.2	atgp-2	WBGene00000225	-0.0853346	6.36584	0.641284	1	atgp-2 encodes an amino acid transporter glycoprotein subunit; when co-expressed in Xenopus oocytes with either the AAT-1 or AAT-3 catalytic subunit, ATGP-2 facilitates amino acid uptake and exchange, showing a relatively high affinity for small and some large neutral amino acids; when co-expressed with AAT-9, ATGP-2 is able to enhance the activity of this catalytic subunit; ATGP-2 can covalently…
K04G2.5	ath-1	WBGene00010564	-0.0999726	5.5014	0.538319	1
C44B9.4	athp-1	WBGene00008081	0.034107	5.34617	0.830051	1
H20J04.2	athp-2	WBGene00019217	-0.108432	6.04242	0.562809	1
Y116A8C.22	athp-3	WBGene00013799	0.520507	0.292948	0.283607	0.873506
C55F2.1	atic-1	WBGene00016957	-0.499029	5.33501	0.000942432	0.0176185
T06E4.3	atl-1	WBGene00000226	-0.0593673	6.42128	0.786705	1	The atl-1 gene encodes a large, 2514-residue protein of the ATM family, homologous to human AT (OMIM:208900, mutated in ataxia telangiectasia); the C-terminal sequence of ATL-1 contains a PI-3 kinase-like domain; ATL-1 is required for survival through early embryogenesis and normal chromosomal segregation; atl-1 is expressed in both the mitotic and meiotic cells of adult gonads.
Y54G2A.2	atln-1	WBGene00021868	-0.181607	6.62773	0.256626	0.84141
Y41E3.3	atln-2	WBGene00012763	-0.35166	5.44279	0.0977539	0.528292
Y48G1BL.2	atm-1	WBGene00000227	0.079261	4.57369	0.586972	1	atm-1 encodes an ortholog of human ATM that is required for the checkpoint response to DNA damage; human ATM encodes a phosphatidylinositol-3 kinase homolog that is biochemically activated by cellular irradiation.
W04D2.1	atn-1	WBGene00000228	-0.136461	7.67369	0.498401	1	atn-1 encodes an alpha-actinin homolog.
C34E10.6	atp-2	WBGene00000229	-0.142815	11.445	0.435555	0.984035	atp-2 encodes the beta subunit of the soluble, catalytic F1 portion of ATP synthase (mitochondrial respiratory chain [MRC] complex V); atp-2 activity is required for embryonic and larval development past the L3 stage, as well as for normal mobility, pharyngeal pumping, defecation, growth rate, and larval lifespan; in males, atp-2 activity is also required cell autonomously in male-specific sensor…
F27C1.7	atp-3	WBGene00000230	-0.16487	9.71561	0.371756	0.952323	atp-3 encodes the C. elegans homolog of the ATP5O subunit of mitochondrial ATP synthase (complex V); as part of the ATP synthase complex, ATP-3 controls respiration and regulates growth rate and body size, aging, and rates of behaviors such as pharyngeal pumping, defecation, and locomotion; loss of atp-3 function during larval development indicates that respiratory rates established during develo…
T05H4.12	atp-4	WBGene00020275	0.113132	8.58926	0.661693	1
C06H2.1	atp-5	WBGene00007385	-0.151285	9.88779	0.54747	1
F09G2.9	attf-2	WBGene00017317	0.148625	7.39861	0.3689	0.950977
F54C4.3	attf-3	WBGene00018794	0.0763081	4.93936	0.731194	1
C05D10.1	attf-4	WBGene00015477	0.0136373	6.51301	0.932371	1
T04G9.1	attf-5	WBGene00020214	-0.0650575	4.73062	0.781016	1
Y18D10A.1	attf-6	WBGene00012474	-0.00850888	5.30976	0.953867	1
D2045.1	atx-2	WBGene00000231	0.0959568	6.42751	0.680014	1	atx-2 is required for early embryonic patterning; it encodes an ortholog of human ataxin-2.
F28F8.6	atx-3	WBGene00006446	-0.0291492	4.28881	0.856511	1	atx-3 encodes a deubiquitylating enzyme that is the C. elegans ortholog of human ataxin-3 (ATXN3); atx-3 deletion mutants show no overt phenotype, but loss of atx-3 activity via RNAi has been reported to result in 10-25% embryonic lethality; however, microarray experiments comparing wild-type and atx-3 mutant strains indicate that loss of atx-3 activity results in expression changes in genes invo…
M01G5.6	ave-1	WBGene00044341	0.115694	3.25894	0.625818	1	ave-1/M01G5.6 encodes a small (102-residue) protein, mostly comprised of a SAM domain, that is orthologous to Drosophila AVEUGLE/CG30476 and to human SAMD10 and SAMD12; AVE-1 is dispensable for viability, since ave-1(tm3169) homozygotes are viable.
B0207.12	avr-14	WBGene00000232	-0.174103	5.92198	0.274533	0.861254	avr-14 encodes an alpha-type subunit of a glutamate-gated chloride channel homologous to human GLRA2, which when mutated leads to hyperekplexia (OMIM:149400); AVR-14 affects sensitivity to the antiparisitic drug, ivermectin, in parallel with avr-15 and glc-1 and in a genetic pathway with unc-9; it functions in the extrapharyngeal nervous system, and is expressed in a subset of neurons in the ring…
R11G10.1	avr-15	WBGene00000233	0.0077119	9.81053	0.97668	1	avr-15 encodes, via alternative splicing, two glutamate-gated chloride channel subunit homologs; these proteins mediate fast inhibitory glutamatergic neuromuscular transmission, as well as ivermectin sensitivity, and are required for normal pharyngeal function.
K02B12.4	axl-1	WBGene00010497	-0.206107	3.8109	0.329874	0.915672	axl-1 encodes, along with pry-1, one of two C. elegans Axin-like proteins; during development, axl-1 functions together with pry-1 to regulate vulval cell fate specification and migration of the Q neuroblast descendants, and separately to regulate excretory cell development; in yeast two-hybrid assays, AXL-1 interacts with BAR-1/beta-catenin, GSK-3, MIG-5, and DSH-2, but notably does not interact…
B0464.7	baf-1	WBGene00000235	0.220364	6.23305	0.316828	0.909292	baf-1 encodes a small, novel protein that is highly conserved amongst metazoa; BAF-1 binds double-stranded DNA nonspecifically in vitro and is essential for proper chromosome segregation, embryogenesis, and gonad development in vivo; biochemical and phenotypic analyses suggest that BAF-1 functions as an intramolecular bridge that mediates nuclear assembly and chromatin capture by the reforming nu…
F57B10.11	bag-1	WBGene00000236	0.416761	4.03548	0.0105769	0.117071	A homolog of the human BAG-family of co-chaperone proteins, negatively regulates Hsp70 and affects cell stress and cell growth.
Y71F9AR.1	bam-2	WBGene00000237	-0.273022	6.48866	0.0861982	0.489066	bam-2 encodes a 1007-residue protein with a predicted N-terminal signal sequence and C-terminal transmembrane sequence, and a central concanavalin A-like lectin/glucanase motif, but no obvious homologs outside of nematodes; BAM-2 is suggested to be related to neurexins on the basis of weak similarities in putatively shared sequence motifs; bam-2 mutants have VC axon branches that overshoot their …
C54D1.6	bar-1	WBGene00000238	-0.0559514	4.74321	0.737507	1	bar-1 encodes a beta-catenin; during C. elegans development, BAR-1 likely functions as a transcriptional coactivator whose activity is required for Q neuroblast migration, P12 cell fate specification, and P3.p through P8.p vulval cell fate specification at two different stages of development; in specifying vulval cell fates, bar-1 interacts with Wnt and MAPK signaling pathways to regulate proper …
C05D2.4	bas-1	WBGene00000239	-0.014547	4.87859	0.928835	1	bas-1 encodes a serotonin- and dopamine-synthetic aromatic amino acid decarboxylase (AAADC) that is required for the synthesis of serotonin from 5-hydroxytryptophan in vivo; mutations of bas-1 impair the turning step in male mating, the migration of AVM, SDQR, ALM, and BDU neurons during development.
C05D2.3	basl-1	WBGene00015467	-0.16653	0.456467	0.82354	1	C05D2.3 generally resembles aromatic-L-amino-acid/L-histidine decarboxylases; however, its predicted protein sequence lacks six residues critical for AADC function.
F12A10.3	basl-2	WBGene00017392	0.0223012	-0.0639332	1	1
F59H6.9	bath-1	WBGene00019139	0.0951147	1.8601	0.746421	1
Y49F6C.4	bath-10	WBGene00021726	0.73034	2.01275	0.0212301	0.194065
F52C6.7	bath-11	WBGene00018664	-0.274793	1.43266	0.340617	0.924888
F59H5.3	bath-12	WBGene00019131	0.0848013	0.603095	0.879077	1
F40B1.1	bath-13	WBGene00018223	0.0226023	0.343554	1	1
B0047.5	bath-14	WBGene00015016	-0.166462	1.53496	0.562559	1
C08C3.2	bath-15	WBGene00015590	0.0630963	2.38071	0.806505	1
F40B1.2	bath-18	WBGene00018224	0.202746	0.203866	0.720643	1
F59H6.1	bath-19	WBGene00019132	0.0363911	1.05034	0.955375	1
F52C6.11	bath-2	WBGene00018668	0.256873	1.78878	0.368911	0.950977
B0047.1	bath-20	WBGene00015012	-0.0429192	0.660474	0.927285	1
F59H6.8	bath-21	WBGene00019138	0.437726	0.687439	0.441462	0.986656
F52C6.1	bath-22	WBGene00018658	-0.457384	0.859028	0.238174	0.819907
Y49F6C.5	bath-23	WBGene00021727	NA	NA	NA	NA
B0047.3	bath-24	WBGene00015014	-0.000133729	1.68738	1	1
T27C10.4	bath-25	WBGene00020859	0.384179	0.241371	0.585264	1
T07H3.6	bath-26	WBGene00020329	-1.75534	3.99443	1.37127e-23	3.56333e-20
F14D2.13	bath-28	WBGene00017461	-0.0919103	2.6763	0.695982	1
F14D2.4	bath-29	WBGene00017452	0.201682	1.15647	0.499761	1
F59H6.10	bath-3	WBGene00019140	-0.119566	2.16996	0.61105	1
F14D2.12	bath-30	WBGene00017460	0.0929338	1.32319	0.778059	1
F12E12.4	bath-31	WBGene00017405	1.1487	0.0829287	0.139933	0.644564
C08E3.3	bath-33	WBGene00015595	0.280146	0.0547742	0.653619	1
W02A11.5	bath-34	WBGene00012195	0.259531	0.631457	0.55609	1
W02A11.8	bath-35	WBGene00012196	-0.121322	0.294551	0.82262	1
Y75B12B.4	bath-36	WBGene00013569	-0.154898	3.16157	0.443511	0.987554
K08E4.5	bath-37	WBGene00010669	-0.177412	2.79662	0.546692	1
F52H3.3	bath-38	WBGene00009945	-0.142406	5.68448	0.457055	0.992746
F25H9.4	bath-39	WBGene00009137	-0.243069	3.43104	0.212836	0.782407
F52C6.8	bath-4	WBGene00018665	-0.18986	1.98505	0.403527	0.970277
Y105E8B.4	bath-40	WBGene00013689	-0.11555	6.14485	0.441954	0.986656
F37A4.9	bath-41	WBGene00018137	0.119146	4.12407	0.456922	0.992746	The F37A4.9 gene encodes a protein with a meprin-associated Traf homology (MATH) domain that may be involved in apoptosis.
C50C3.8	bath-42	WBGene00016803	0.192004	6.1605	0.210354	0.778504	bath-42 encodes a BTB (broad-complex, Tramtrack, and bric-a-brac) and MATH (meprin-associated Traf homology) domain-containing protein; loss of bath-42 function results in increased levels of the RIC-3 nicotinic acetylcholine receptor (nAChR)-specific chaperone in vulval muscles and decreased egg-laying in response to treatment with levamisole, an nAChR agonist; in addition, overexpression of BAT…
T16H12.5	bath-43	WBGene00011815	-0.185973	5.95641	0.407227	0.97301	The T16H12.5 gene encodes a protein with a meprin-associated Traf homology (MATH) domain that may be involved in apoptosis.
C07D10.2	bath-44	WBGene00015567	-0.00147429	5.78095	0.994968	1	The C07D10.2 gene encodes a protein with a meprin-associated Traf homology (MATH) domain that may be involved in apoptosis.
F29C12.5	bath-45	WBGene00009247	0.3502	0.581024	0.431824	0.983641
T07H3.2	bath-46	WBGene00020325	-0.271143	1.98911	0.376066	0.956464
T07H3.1	bath-47	WBGene00006464	-0.781177	4.73182	0.00057563	0.0119529
F59H6.11	bath-5	WBGene00019141	-0.21235	1.86756	0.459947	0.993874
F52C6.9	bath-6	WBGene00018666	-0.0834574	1.22389	0.807254	1
F52C6.10	bath-7	WBGene00018667	0.138259	1.43699	0.638171	1
Y49F6C.1	bath-8	WBGene00021723	0.562958	0.72553	0.240454	0.821882
Y49F6C.3	bath-9	WBGene00021725	0.226683	3.21875	0.227789	0.80503
ZK783.4	baz-2	WBGene00001470	0.200127	5.89206	0.312938	0.905899	flt-1 encodes a putative homolog of flectin, an extracellular matrix protein thought to provide a microenvironment of great elasticity; however, FLT-1 protein contains no similarity to other ECM components, instead mostly appearing to be made up of chromatin or DNA-binding domains; FLT-1 also contains a glutamine/asparagine-rich domain, which may mediate epigenetic regulation.
Y105E8A.5	bbs-1	WBGene00000241	0.0151692	3.69863	0.931776	1	bbs-1 encodes the C. elegans ortholog of human BBS1, a protein containing a predicted beta-propeller domain; bbs-1 is a component of and is required for proper intraflagellar transport (IFT); bbs-1 acts in ciliated neurons in a pathway along with kat-1/3-ketoacyl-coA thiolase, tub-1/tubby and other genes involved in ciliary structure and function to regulate fat storage, as such, bbs-1 affects bo…
F20D12.3	bbs-2	WBGene00000242	0.0085922	3.25494	0.968007	1	bbs-2 encodes a ciliary protein that is orthologous to human BBS2; bbs-2 is expressed exclusively in ciliated sensory neurons at the transition zone and along the axoneme; BBS proteins are required for ciliary structure and function; BBS-2 along with other BBS proteins undergoes intraflagellar transport (IFT); loss of function mutations in the guanylate cyclase complex GCY-35/GCY-36 results in a …
F58A4.14	bbs-4	WBGene00043992	0.00874477	2.53013	0.977395	1	bbs-4 encodes the ortholog of human BBS4 and is paralogous to elegans bbs-8 and osm-5 which are all ciliary proteins involved in ciliary structure and function.
R01H10.6	bbs-5	WBGene00010974	-0.0275214	4.34116	0.859752	1	bbs-5 encodes a novel protein that is the C. elegans ortholog of human BBS5; bbs-5 is required for the proper regulation of insulin secretion; bbs-5, bbs-1, bbs-8 and bbs-9 mutants along with ciliary phenotypes show an increased secretion of insulin, biogenic amines and neuropeptides which requires the Rab27/AEX-6 dense-core vesicle exocytosis machinery; a BBS-5::GFP reporter protein is expressed…
T25F10.5	bbs-8	WBGene00000244	0.049114	4.3444	0.75094	1	bbs-8 encodes a tetratricopeptide repeat (TPR)-containing protein that is orthologous to the human Bardet-Biedl syndrome protein, BBS8; in C. elegans, bbs-8 activity is required for cilia biogenesis and function; accordingly, bbs-8 mutant animals display odorant chemotaxis defects and exhibit both aberrant motility and abnormal localization of at least two intraflagellar transport (IFT) protein m…
C48B6.8	bbs-9	WBGene00016744	-0.136628	2.63837	0.599979	1	bbs-9 is orthologous to the human parathyroid hormone-responsive B1 gene, also known as BBS9; bbs-9 apart from being required for proper cilium morphology and function, is also required, similar to bbs-1, bbs-5, and bbs-8, for the regulation of insulin release from sensory neurons; bbs-9 mutants exhibit an increased secretion of insulin, daf-7, a neurally expressed TGF-beta ligand, and flp-21, a …
T13C5.5	bca-1	WBGene00000245	-0.204061	6.34161	0.542567	1	bca-1 encodes a member of the carbonic anhydrase family.
Y116A8C.28	bca-2	WBGene00013805	0.318374	5.97751	0.291303	0.882544
K02A4.1	bcat-1	WBGene00001149	0.637044	8.72161	0.000582331	0.0120507	bcat-1 encodes a branched-chain amino acid aminotransferase that, by homology, is predicted to catalyze the first reaction in the catabolism of essential branched-chain amino acids such as leucine, isoleucine, and valine; in C. elegans, large-scale RNA-mediated interference (RNAi) screens indicate that bcat-1 activity is required for embryonic and larval development.
M7.3	bcc-1	WBGene00000246	-0.238997	3.55142	0.239854	0.821882	bcc-1 encodes a homolog of Drosophila and vertebrate Bicaudal C (BICC) that contains KH RNA-binding domains, a serine-rich region, and a SAM (sterile alpha motif) domain; by homology, BCC-1 is predicted to function as a cytoplasmic RNA-binding protein that is required for translational regulation and/or mRNA stability during embryonic or germline development; however, as loss of bcc-1 activity vi…
F13H6.1	bcl-11	WBGene00017430	-0.193134	8.0438	0.334169	0.920098
C28H8.1	bcl-7	WBGene00016192	0.0315433	4.08745	0.850402	1	bcl-7 encodes the sole C. elegans member of the BCL7 family of proteins that contains human proteins, namely BCL7A and BCL7B, that are associated with malignant diseases; bcl-7 activity is required for proper terminal seam cell differentiation as well as for normal development of the distal tip cells of the somatic gonad and germ line; in controlling cell development and differentiation, bcl-7 in…
Y46G5A.24	bcmo-1	WBGene00012914	0.0931859	1.37561	0.853162	1
F53C3.12	bcmo-2	WBGene00018755	-0.384248	4.55029	0.0188016	0.178078
F54C9.6	bcs-1	WBGene00010042	-0.00623276	4.51231	0.977244	1	F54C9.6 encodes a protein orthologous to the human mitochondrial protein BCS1 (YEAST HOMOLOG)-LIKE (BCS1L; OMIM:603647); mutation of BCS1L leads to neonatal tubulopathy, encephalopathy, and liver failure, or to GRACILE syndrome.
T19E7.3	bec-1	WBGene00000247	0.296097	4.74845	0.0977752	0.528292	bec-1 encodes a coiled-coil protein orthologous to the yeast and mammalian autophagy proteins Atg6/Vps30/Beclin1; by homology, BEC-1 may be part of a Class III phosphatidylinositol 3-kinase complex that plays a role in localizing autophagy proteins to preautophagosomal structures and overexpression of C. elegans bec-1 in S. cerevisiae APG6/VPS30 mutants can rescue associated autophagy defects; be…
Y39B6A.12	bed-1	WBGene00012674	0.0261247	4.58565	0.876959	1
Y47D3B.9	bed-2	WBGene00012943	0.257152	5.45824	0.142192	0.650922
F25H8.6	bed-3	WBGene00009133	0.435813	2.68361	0.070187	0.431318	bed-3 encodes a protein that contains a BED-type zinc finger domain; loss of bed-3 activity in large-scale RNAi screens indicates that bed-3 is required for larval development.
C54C6.2	ben-1	WBGene00000248	-0.0566571	5.90662	0.730814	1	A beta-tubulin that confers benzimidazole sensitivity.
B0564.3	best-1	WBGene00007203	-0.247431	6.80748	0.589278	1
C49A1.2	best-10	WBGene00008185	-0.204238	1.16507	0.510662	1
C49A1.3	best-11	WBGene00008186	0.268423	0.822055	0.703681	1
F14H3.2	best-12	WBGene00008821	-0.199603	0.506666	0.738508	1
F32B6.9	best-13	WBGene00009323	0.0787716	5.27325	0.662291	1
F32G8.4	best-14	WBGene00009340	-0.98292	6.70802	1.61234e-07	1.12369e-05
R13.3	best-15	WBGene00011258	-1.16705	3.19106	1.65978e-08	1.61451e-06
R13A1.9	best-16	WBGene00020046	-0.117435	2.64635	0.702308	1
T19C3.1	best-17	WBGene00020559	-0.584401	3.92281	0.0198796	0.185046
T20G5.4	best-18	WBGene00011868	-0.44793	5.25807	0.00432247	0.0594298
B0564.4	best-2	WBGene00007204	-0.0828644	3.33871	0.848237	1
Y37E11AR.1	best-20	WBGene00021368	0.181666	1.35484	0.824269	1
Y73F8A.11	best-21	WBGene00013520	-0.599534	0.684876	0.151758	0.675492
ZC518.1	best-22	WBGene00013921	-0.10796	5.54469	0.450079	0.989357
ZK675.3	best-23	WBGene00014989	-0.134234	5.01843	0.431048	0.983365
ZK688.2	best-24	WBGene00022797	-0.640592	6.63139	0.0317795	0.259902
ZK849.4	best-25	WBGene00014102	0.595234	1.76347	0.453204	0.990719
ZK849.5	best-26	WBGene00014103	0.0336375	0.119359	0.984222	1
C01B12.3	best-3	WBGene00015286	-0.416147	4.33088	0.00640256	0.0800496	C01B12.3 is orthologous to the human gene VITELLIFORM MACULAR DYSTROPHY PROTEIN (VMD2; OMIM:153700), which when mutated leads to disease.
C01B12.5	best-4	WBGene00015288	-0.0279108	2.81215	0.9111	1
C07A9.8	best-5	WBGene00007404	-0.916975	3.08774	0.000189007	0.00476182
C09B9.3	best-6	WBGene00015628	0.148116	0.714532	0.867059	1
C29F4.2	best-7	WBGene00007808	0.278613	3.26257	0.376158	0.95655
C37A5.1	best-8	WBGene00007988	0.143942	2.49837	0.667527	1
C43G2.4	best-9	WBGene00016613	0.189993	4.09922	0.313708	0.906173
Y119C1B.8	bet-1	WBGene00022473	-0.0176812	6.64121	0.938829	1	bet-1 encodes a BET-family protein that colocalizes with chromosomes; Bet-family proteins are evolutionarily conserved, have two bromodomains, which recognize acetylated histone; BET-1 functions cell-autonomously; in bet-1 mutants, asymmetry of T-cell division is initially normal but later disrupted, BET-1 regulates the expression of cell-fate determinants, such as MEC-3, to prevent the excessive…
F57C7.1	bet-2	WBGene00010199	-0.00994957	7.00178	0.958862	1
T19B10.3	bgal-1	WBGene00011832	-0.52603	4.71232	0.00336851	0.0483697	The T19B10.3 gene encodes an ortholog of the human gene GALACTOSIDASE, BETA 1 (GLB1), which when mutated leads to gangliosidosis type I (OMIM:230500).
H22K11.2	bgal-2	WBGene00019225	-0.000872547	4.02011	0.998916	1
C43G2.2	bicd-1	WBGene00016611	0.0850228	6.50444	0.73073	1	bicd-1 encodes the C. elegans homolog of Drosophila BicaudalD, a dynein regulator; in C. elegans, bicd-1 is an essential gene and is also required for hyp7 nuclear migrations; BICD-1 physically interacts with UNC-83 and EGAL-1, and thus likely functions as part of a dynein regulatory complex (that also includes DLC-1) that controls the directionality and extent of nuclear migrations; a bicd-1::GF…
T27F2.3	bir-1	WBGene00000249	0.133586	4.89489	0.391349	0.963567	bir-1 encodes a homolog of the baculoviral inhibitor-of-apoptosis (IAP) repeat (BIR) proteins (BIRPs) family; bir-1 is required for meiotic and mitotic chromosome segregation and for cytokinesis; BIR-1 localizes to meiotic and mitotic chromosomes and to the spindle midzone; BIR-1 forms a protein complex with CSC-1, ICP-1 and AIR-2.
C50B8.2	bir-2	WBGene00000250	0.257553	2.0818	0.250075	0.833279	The bir-2 gene encodes a protein with two BIR domains that may be involved in apoptosis.
Y39G8C.3	bkip-1	WBGene00014569	-0.099115	2.89458	0.679624	1	bkip-1 encodes a novel transmembrane protein conserved amongst nematodes; genetic studies indicate that BKIP-1 functions to regulate the activity of the SLO-1 Ca2+- and voltage-gated potassium channel; BKIP-1 and SLO-1 interact in vitro; a BKIP-1::GFP fusion protein is expressed in most neurons, body wall muscles cells, and the head mesodermal cell, and localizes to the nerve ring and the dense b…
C09G5.6	bli-1	WBGene00000251	0.441179	1.557	0.541212	1	The bli-1 gene encodes an unusual cuticular collagen that is required for proper strut formation within the unique medial layer of the adult cuticle; bli-1 interacts genetically with other cuticular collagens such as bli-2 and rol-1, and may be processed for secretion by BLI-4, a Kex2/subtilisin serine endoproteinase; consistent with its role in adult cuticle formation, bli-1 mRNA is highly expre…
F59E12.12	bli-2	WBGene00000252	0.0560277	0.0201501	0.95115	1	A cuticle collagen involved in strut assembly in the adult cuticle.
F56C11.1	bli-3	WBGene00000253	-0.452867	5.84599	0.00559496	0.0723842	bli-3 encodes an NADPH oxidases of the dual oxidase (DUOX) variety that contains an N-terminal peroxidase domain, two central calmodulin-binding EF hands, and a C-terminal superoxide-generating NADPH-oxidase domain; BLI-3 is required for dityrosine cross-linking of collagen, and thus for cuticular integrity; BLI-3 is thought to use cytosolic NADPH to generate reactive oxygen, which then drives th…
K04F10.4	bli-4	WBGene00000254	-0.0179093	7.27293	0.911577	1	bli-4 encodes a variety of related subtilases (serine endoproteases of the KEX2/subtilisin class), with shared N-termini but varying C-termini, that are collectively required both for larval viability and for stable adhesion of the adult cuticle.
F45G2.5	bli-5	WBGene00000255	NA	NA	NA	NA	bli-5 encodes a protease inhibitor that affects the integrity of the cuticle and the development of the bursa in the adult male.
Y73B6BL.34	bli-6	WBGene00000256	0.210689	1.08182	0.744176	1	bli-6 encodes a collagen involved in adult cuticle structure.
F25D7.3	blmp-1	WBGene00003847	0.066911	4.56963	0.716836	1	blmp-1 encodes a zinc finger and SET domain-containing protein that is the C. elegans BLIMP1 (B lymphocyte-induced maturation protein 1) ortholog; loss of blmp-1 activity via deletion mutation has been reported to result in small, dumpy animals with abnormal fat content, while loss of blmp-1 activity via RNAi reportedly results in animals that are small, dumpy, have an amorphous pharynx, and are …
T20G5.10	blos-1	WBGene00011872	0.0462665	2.82726	0.84775	1
Y73B6BL.30	blos-2	WBGene00022251	0.0723733	4.24947	0.663257	1
T24H7.4	blos-4	WBGene00020783	0.100838	2.26786	0.717982	1
F23B12.8	bmk-1	WBGene00000257	0.248475	4.31894	0.251125	0.834464	bmk-1 encodes the sole C. elegans BimC/kinesin-5 homolog; while BMK-1 activity is not essential for mitotic progression or development, BMK-1 does play a role in negatively regulating interpolar microtubule sliding during anaphase spindle elongation, thus serving as a brake to slow the rate of spindle-pole separation; BMK-1 localizes to mitotic and meiotic spindles and becomes concentrated at the…
F09E5.17	bmy-1	WBGene00017293	0.195004	4.43963	0.225071	0.800711
F55C5.11	bnc-1	WBGene00044791	NA	NA	NA	NA
F13H8.10	bpl-1	WBGene00000259	-0.206261	5.67422	0.231691	0.811721	bpl-1 encodes an ortholog of biotin ligase/holocarboxylase synthetase (called biotin ligase in bacteria, and holocarboxylase synthetase in mammalian or animal systems); it is orthologous to human HOLOCARBOXYLASE SYNTHETASE (HLCS; OMIM:253270), which when mutated leads to HLCS deficiency.
F54B11.6	bra-1	WBGene00000262	0.196396	4.16276	0.227009	0.803676	The bra-1 gene encodes a homolog of the human BMP receptor-associated molecule (BRAM1) that negatively regulates the DAF-1/DAF-7/DAF-14 TGF-beta signalling pathway.
F23H11.1	bra-2	WBGene00017757	0.144482	4.77868	0.323075	0.91105	The bra-2 gene encodes a homolog of the human BMP receptor-associated molecule (BRAM1), paralogous to bra-1, that may act upon the SMA-6 TGF-beta signalling pathway
EEED8.16	brap-2	WBGene00017144	-0.179078	4.84034	0.359654	0.941717
C36A4.8	brc-1	WBGene00000264	0.119218	3.38753	0.52434	1	brc-1 encodes an ortholog of human BRCA1 (OMIM:113705, mutated in early onset breast and ovarian cancer) required for double-strand break repair via inter-sister recombination during meiosis; BRC-1 forms a heterodimer with BRD-1, which constitutes an E3 ubiquitin ligase; after irradiation, the DNA checkpoint proteins ATL-1 and MRE-11 are required for BRC-1/BRD-1 heterodimers to associate with RAD…
T07E3.5	brc-2	WBGene00020316	0.0288383	3.6324	0.856172	1	brc-2 encodes a BRC domain-containing protein that is homologous to human BRCA2 which when mutated leads to early-onset breast cancer 2 or hereditary male breast cancer (OMIM:600185); in C. elegans, BRC-2 activity is essential for RAD-51-mediated repair of meiotic and radiation-induced double-strand breaks (DSBs); BRC-2 physically interacts with RAD-51 and single-stranded DNA and is required for …
K04C2.4	brd-1	WBGene00000265	0.627684	2.45931	0.0139323	0.144243	brd-1 encodes an ortholog of the BRCA1-associating protein BARD1 (OMIM:601593), associated with susceptibility to breast cancer; BRD-1 forms a heterodimer with BRC-1, which constitutes an E3 ubiquitin ligase; after irradiation, the DNA checkpoint proteins ATL-1 and MRE-11 are required for BRC-1/BRD-1 heterodimers to associate with the E2 ubiqutin-conjugating enzyme LET-70/Ubc5 and with RAD-51, an…
C53B4.7	bre-1	WBGene00000266	0.0923225	5.84213	0.609419	1	bre-1 encodes one of two C. elegans GDP-mannose 4, 6-dehydratases; BRE-1 exhibits GDP-mannose dehydratase activity when expressed in vitro and thus, is predicted to function in vivo in the first step of the biosynthetic pathway that synthesizes GDP-fucose from GDP-mannose; bre-1 is required for toxicity to Cry5B, a Bacillus thurigensis delta-endotoxin, as mutant animals are defective for producti…
Y39E4B.9	bre-2	WBGene00000267	-0.234071	3.051	0.22364	0.797942	bre-2 is required for Cry5B toxicity.
B0464.4	bre-3	WBGene00000268	-0.123214	5.47722	0.460832	0.993932	bre-3 encodes a protein similar to beta-glycosyltransferases from bacteria that is required for the toxicity of Bacillus thuringiensis Cry5B; BRE-3 may act in a pathway with bre-5 and is expressed and functions in the gut epithelium.
Y73E7A.7	bre-4	WBGene00000269	-0.0682211	5.00469	0.669199	1	bre-4 encodes a beta-1,4-N-acetylgalactosaminyltransferase that is required for the toxicity of Bacillus thuringiensis Cry5B.
T12G3.8	bre-5	WBGene00000270	-0.0806418	3.19764	0.711225	1	The bre-5 gene encodes a putative beta-1,3-galactosyltransferase that is predicted to transfer galactose onto proteins or lipids; BRE-5 is required for Cry5B toxicity.
F45E12.2	brf-1	WBGene00000271	-0.0553963	5.27431	0.766862	1	brf-1 encodes an ortholog of mammalian B-RELATED FACTOR (also known as BRF, TDS4, PCF4, or hTFIIIB90); BRF is thought to act as a molecular bridge between TATA-binding protein (TBP) associated factors that functions in TFIIIB (RNA polymerase III associated transcription factors).
M02B7.5	bris-1	WBGene00019726	0.0625831	5.59078	0.770366	1
F56A3.5	bro-1	WBGene00000272	-0.115495	0.688228	0.799406	1	bro-1 encodes an ortholog of human CBFB (OMIM:121360, mutated in acute myeloid leukemia and CBFB haploinsufficiency) and Drosophila BRO/BGB; BRO-1 is required for the normal proliferation and differentiation of seam cells, alae, and male tail rays; bro-1 mutants exhibit defective seam cell division and differentiation, and males exhibit ray loss; conversely, transgenic overexpression of BRO-1 ind…
Y79H2A.1	brp-1	WBGene00000273	-0.116277	9.42515	0.596254	1	brp-1 encodes a glutamine-rich protein that is conserved in nematodes, but that has no known homologies or sequence motifs; BRP-1 is able to bypass the need for the S. cerevisiae mating pheromone MAP kinase cascade to activate the mating pheromone-responsive gene FUSl.
F40G9.4	btb-1	WBGene00001963	0.119194	1.14105	0.758635	1
K02E7.9	btb-10	WBGene00019313	0.198236	2.04343	0.55495	1
M01D1.3	btb-11	WBGene00019700	1.17013	0.679347	0.0313216	0.257801
ZC204.3	btb-12	WBGene00022555	0.816298	0.186515	0.126562	0.613305
ZC204.11	btb-13	WBGene00022561	0.496439	0.356609	0.352418	0.934032
Y57A10B.3	btb-14	WBGene00013275	0.0956426	4.23207	0.61016	1
C08E3.2	btb-15	WBGene00015594	-0.0287438	0.251485	0.982888	1
F39E9.2	btb-16	WBGene00018195	-0.998446	4.75547	5.9859e-08	4.71357e-06
F39E9.11	btb-17	WBGene00018200	-0.0424345	3.26483	0.844613	1
F39E9.12	btb-18	WBGene00018201	0.0928898	2.13463	0.80732	1
F57C2.2	btb-19	WBGene00010194	0.240589	1.47067	0.465298	0.994392
T25D10.5	btb-2	WBGene00020802	NA	NA	NA	NA
F57C2.1	btb-20	WBGene00010193	0.163269	2.01298	0.562532	1
F47C10.2	btb-21	WBGene00018540	1.03227	2.70064	0.000251508	0.00598813
B0047.2	btb-3	WBGene00015013	-0.305417	2.23173	0.207598	0.775733
F59H6.12	btb-4	WBGene00019142	-0.0427321	3.29707	0.859526	1
W05G11.5	btb-5	WBGene00021042	0.0721879	0.819298	0.889313	1
F45C12.7	btb-6	WBGene00018438	1.65191	2.04025	0.00757076	0.0909799
F45C12.12	btb-7	WBGene00018443	0.532795	-0.0784238	0.519221	1
F45C12.6	btb-8	WBGene00018437	1.21593	0.902553	0.076451	0.456098
F45C12.4	btb-9	WBGene00018435	0.233409	3.9806	0.220734	0.794626
R05F9.1	btbd-10	WBGene00019888	-0.0731698	6.51935	0.732195	1
F15D4.1	btf-1	WBGene00000274	-0.0544026	5.43048	0.721884	1	btf-1 encodes a member of the TBP-associated family (TAF), with weak similarity to human TBP-associated factor 172.
R06C7.8	bub-1	WBGene00000275	0.683885	4.73913	0.000294978	0.00689672	bub-1 encodes a serine/threonine kinase orthologous to Saccharomyces cerevisiae BUB1 which is required for proper function of the mitotic spindle assembly checkpoint and human BUB1 (OMIM:602452) which is mutated in some colorectal cancers; BUB-1 activity is required at several stages of development, including embryogenesis; BUB-1 is expressed predominantly in the anterior of the embryo and in hyp…
Y54G9A.6	bub-3	WBGene00013209	0.0329736	5.1863	0.817071	1
R03H4.6	bus-1	WBGene00044617	0.117047	2.09904	0.665609	1	bus-1 encodes an integral membrane O-acyltransferase; bus-1 mutants are resistant to colonization by Microbacterium nematophilum; a bus-1::GFP reporter fusion is expressed in rectal cells from late embryogenesis through adulthood with some adjacent neurons as well as two head neurons, probably amphidial, also showing expression.
JC8.12	bus-12	WBGene00010442	-0.088493	1.29052	0.856598	1	bus-12 encodes a predicted nucleotide-sugar transporter and is most similar to sqv-7 within the elegans genome, which encodes a protein that can transport UDP-glucuronic acid, UDP-N acetylgalactosamine, and UDP-galactose, when expressed in yeast cells, and UDP-galactose when expressed in canine cells; bus-12 mutants show little or no infection when grown in the presence of the nematode-specific p…
ZK678.8	bus-17	WBGene00044630	0.482748	2.17991	0.101605	0.540726	bus-17 encodes a putative GT13 glycosyltransferase whose homologs include human B3GALT2 and C. elegans BRE-5; BUS-17 is required for bacterial infection, as well as for cuticle integrity, long-term survival, and traction during movement; specifically, bus-17 is needed both for colonization by Microbacterium nematophilum (and the tail-swelling response to M. nematophilum infection) and for attachm…
F55A11.5	bus-18	WBGene00044631	0.858839	0.682778	0.0198881	0.185046	bus-18 encodes a lysocardiolipin acyltransferase; bus-18 is required for colonization by Microbacterium nematophilum and the tail-swelling response to M. nematophilum infection, as well as for cuticle integrity, traction during movement, full body size, normally rapid growth, and vulval morphogenesis; bus-18 is also needed for normal cuticle antigens and resistance to emetine or colchicine, perha…
T07F10.4	bus-19	WBGene00011590	0.641647	5.7344	0.000175593	0.00446718	bus-19 encodes an ancient but unfamiliar transmembrane protein required for colonization by Microbacterium nematophilum and the tail-swelling response to M. nematophilum infection, as well as for cuticle integrity and traction during movement, normal alae and body shape, dauer formation, normally rapid growth, and larval viability; BUS-19 (along with Y71A12C.2) is orthologous to human TMEM41A, an…
K08D12.5	bus-2	WBGene00044618	-0.123303	2.07572	0.63763	1	bus-2 encodes a predicted glycosyltransferase that contains conserved domains of core-1 beta1,3 galactosyltransferases; bus-2 is required for bacterial infection, and for fully normal cuticle integrity; specifically, bus-2 is needed both for colonization by Microbacterium nematophilum (and the tail-swelling response to M. nematophilum infection), and for attachment of Yersinia pseudotuberculosis …
T22B11.2	bus-4	WBGene00044620	0.278835	1.92043	0.421222	0.978488	bus-4 encodes a galactosyltransferase; bus-4 is required for bacterial infection, and for fully normal cuticle integrity and body size; specifically, bus-4 is needed both for colonization by Microbacterium nematophilum (and the tail-swelling response to M. nematophilum infection) and for attachment of Yersinia pseudotuberculosis biofilms.
T23F2.1	bus-8	WBGene00044623	0.261882	2.64419	0.505631	1	bus-8 encodes a glycosyltransferase related to mannosyltransferases that play a role in protein N-linked glycosylation ; bus-8 is required for colonization by Microbacterium nematophilum and the tail-swelling response to M. nematophilum infection; bus-8 is also essential for enclosure during embryonic morphogenesis, functioning in or with ephrin-mediated signaling to effect the proper neuroblast …
F57B9.5	byn-1	WBGene00000276	-0.204199	8.57345	0.353771	0.934768	byn-1 encodes a homolog of mammalian BYSTIN-LIKE (BYSL; OMIM:603871).
C06A5.10	C06A5.10	CDS:C06A5.10	NA	NA	NA	NA
C06A5.4	C06A5.4	CDS:C06A5.4	0.0299738	0.532148	0.973823	1
C06A5.5	C06A5.5	CDS:C06A5.5	0.00282695	0.0756802	1	1
C44E4.8	C44E4.8	CDS:C44E4.8	0.355849	1.6816	0.275499	0.862386
C46G7.3	C46G7.3	CDS:C46G7.3	0.0135645	0.280069	1	1
C23H4.1	cab-1	WBGene00000277	-0.0955006	10.0629	0.671798	1	Novel protein which has a C-terminal motif weakly homologous to mouse NPDC-1 and is involved in synaptic regulation; it is expressed in various neurons including ventral cord and tail ganglion neurons; it physically interacts with AEX-3, which is a guanine nucleotide exchange factor for the Rab3 GTPase.
W03H9.4	cacn-1	WBGene00012230	0.00841838	4.89838	0.96103	1	cacn-1 encodes an ortholog of Drosophila CACTIN and human C19orf29 that is required for normal distal tip cell migration, embryonic viability, fertility, locomotion, vulval morphogenesis, and normally rapid growth; like CACTIN, CACN-1 contains predicted coiled-coil domains, but otherwise lacks recognizable similarity to known proteins.
F54D8.4	cah-1	WBGene00000279	0.15202	3.67465	0.352957	0.934283	cah-1 encodes a member of the carbonic anhydrase family.
D1022.8	cah-2	WBGene00000280	-0.178622	3.97735	0.288794	0.880222	cah-2 encodes a predicted carbonic anhydrase.
K05G3.3	cah-3	WBGene00000281	-0.776435	7.10032	1.43033e-05	0.000539786	cah-3 encodes a putative carbonic anhydrase, closely similar to its paralog CAH-5; cah-3 is expressed in intestine and head (including neurons) of L3 larvae through adults, and its transcription is moderately stimulated by DBL-1 and SMA-2; CAH-3 is bound by CKU-80 in two-hybrid assays, but has no obvious function in mass RNAi assays.
R01E6.3	cah-4	WBGene00000282	-0.796662	7.5682	0.000866728	0.0165457	cah-4 encodes a carbonic anhydrase homolog, which is rather divergent from other such homologs in C. elegans (with at most 38% identity to any other carbonic anhydrase, in or out of C. elegans); it is individually dispensable for viability and for grossly normal postembryonic morphology, and thus may have a more subtle biological function than the basic cytoprotective functions expected for carbo…
R173.1	cah-5	WBGene00000283	-0.257526	5.36458	0.147494	0.665571	cah-5 encodes a member of the carbonic anhydrase family.
T28F2.3	cah-6	WBGene00000284	-0.0579788	5.71769	0.690379	1	cah-6 encodes a predicted carbonic anhydrase.
C13C12.1	cal-1	WBGene00000285	0.0337668	5.41086	0.859774	1	cal-1 encodes one of five predicted C. elegans calcium-binding calmodulin homologs (the others being CAL-2, CAL-3, CAL-4, and CMD-1); as loss of cal-1 function via RNA-mediated interference (RNAi) does not result in any abnormalities, the precise role of CAL-1 in C. elegans development and/or behavior is not yet known.
C18E9.1	cal-2	WBGene00000286	-0.0643797	6.06289	0.757877	1	cal-2 encodes a calmodulin homolog required for embryonic development or viability; CAL-2 is closely similar to its paralogs CAL-1, CAL-3, CAL-4 and CMD-1.
M02B7.6	cal-3	WBGene00000287	0.0030706	3.71293	0.993863	1	cal-3 encodes a member of the calmodulin family.
T07G12.1	cal-4	WBGene00000288	-0.143666	6.33447	0.358325	0.939726	cal-4 encodes one of five predicted C. elegans calcium-binding calmodulin homologs (the others being CAL-1, CAL-2, CAL-3 and CMD-1); as loss of cal-4 function via RNA-mediated interference (RNAi) does not result in any abnormalities, the precise role of CAL-4 in C. elegans development and/or behavior is not yet known.
C24H10.5	cal-5	WBGene00006861	-0.84097	6.35154	3.59028e-06	0.000165335	uvt-2 encodes a protein that contains four EF-hand calcium binding motifs with similarity to human calmodulin; mRNA weakly expressed in L1 through L4 larval stages and in the adult hermaphrodite.
Y73B3A.12	cal-6	WBGene00022214	-0.211814	2.40664	0.373617	0.953689
F40F9.8	cal-7	WBGene00009585	NA	NA	NA	NA
F12A10.5	cal-8	WBGene00017394	0.193313	2.53061	0.353363	0.934391
B0250.2	calf-1	WBGene00007119	-0.0865735	3.93649	0.628817	1	calf-1 encodes a novel Type I transmembrane protein conserved amongst nematodes; CALF-1 is required, along with UNC-36, for proper intracellular trafficking, presynaptic localization, and functional maturation of UNC-2, an alpha 1 subunit of the C. elegans neuronal CaV2 voltage-gated calcium channel, in sensory and motor neurons throughout development; calf-1 also functions in a calcium-dependent…
F30A10.1	calm-1	WBGene00009260	-0.179329	3.71012	0.373779	0.953689
M03F4.7	calu-1	WBGene00019760	0.426969	6.23879	0.0116693	0.125899
F08B6.3	calu-2	WBGene00017240	-0.187394	4.15009	0.278704	0.866752
C01G6.8	cam-1	WBGene00000289	0.129833	7.066	0.41668	0.975402	cam-1 encodes a receptor tyrosine kinase of the immunoglobulin superfamily that is orthologous to human ROR1 (OMIM:602336) and ROR2 (OMIM:602337, mutation of which leads to type B brachydactyly); cam-1 is required for locomotion, cell migration, asymmetric cell division, axon outgrowth, and dauer formation; CAM-1, along with LIN-17, CWN-2, and DSH-1, functions as part of a Wnt signaling pathway t…
T05C1.4	camt-1	WBGene00020251	-0.093537	6.96885	0.5827	1	T05C1.4 encodes, by alternative splicing, two members of the CAMTA family of calmodulin-binding transcriptional activators that are required for embryonic development; CAMTA proteins are conserved in animals and plants but absent from unicellular eukaryotes, and may thus represent a transcriptional activator specific to multicellular organisms; the common organization of CAMTA proteins is to have…
Y102A5A.1	cand-1	WBGene00013606	-0.116096	7.11792	0.485287	1	cand-1 encodes the ortholog of the human and metazoan CAND1 (cullin-associated and neddylation-dissociated) protein which contains multiple HEAT repeats and binds to the cullin-Rbx1 dimeric complex; cand-1 can physically bind all six cullins in C. elegans and negatively regulates the neddylation of CUL-2 and CUL-4, suggesting that CAND-1 promotes cullin stability, however cullin-dependent cellula…
D2024.6	cap-1	WBGene00000292	-0.00423886	6.92078	0.979955	1	cap-1 encodes an F-actin capping protein alpha subunit that affects fertility; likely expressed in touch receptor neurons.
M106.5	cap-2	WBGene00000293	-0.0823627	7.5796	0.61103	1	The beta subunit of actin capping protein that regulates actin cytoskeleton assembly and establishment of initial asymmetry in the embryo; it is expressed in the cytoplasm of all cells in the embryo.
Y23B4A.2	capa-1	WBGene00021268	-0.298662	5.46311	0.215588	0.786983	capa-1 encodes a neuropeptide precursor that can produce a pyrokinin (PK)-like peptide and two periviscerokinin (PVK)-like peptides; a synthetic peptide corresponding to the AFFYTPRI-NH2 sequence of CAPA-1 is able to bind and activate the G protein-coupled receptor encoded by NMUR-2 when the latter is expressed in HEK293T cells; antibodies that recognize the protein products of CAPA-1 stain two p…
F29D11.2	capg-1	WBGene00009254	-0.0213903	6.01069	0.920206	1	capg-1 encodes the C. elegans homolog of human CAP-G, a subunit of the condensin I complex that functions to organize chromosomal structure and regulate chromosome segregation; immunoprecipitation experiments using C. elegans embryonic extracts demonstrate that CAPG-1 is a member of two distinct condensin I complexes, condensin I and condensin I-DC, that regulate meiotic and mitotic chromosome se…
F55C5.4	capg-2	WBGene00010093	0.842971	4.05461	9.38241e-06	0.000379258
Y18D10A.17	car-1	WBGene00012484	0.167747	6.44563	0.265706	0.850445	car-1 encodes a putative RNA-binding protein orthologous to budding yeast Scd6p, fission yeast Sum2p, Drosophila TRAL, and human LSM14A and LSM14B; CAR-1 inhibits physiological apoptosis in oocytes, keeping it down to a normal level of ~50% in hermaphrodite gonads; independently of apoptosis, CAR-1 is also required for normal oogenesis, early embryonic cytokinesis, and normally organized endoplas…
Y23H5A.7	cars-1	WBGene00000800	0.011587	6.39479	0.965819	1	crs-1 encodes a predicted cytoplasmic cysteinyl-tRNA synthetase (CysRS), a class I aminoacyl-tRNA synthetase that catalyzes the attachment of cysteine to its cognate tRNA and is thus required for protein biosynthesis; CRS-1 is essential for embryonic and larval development, and is required for molting and a normal rate of postembryonic development.
Y23H5A.1	cars-2	WBGene00000801	0.0806204	3.88453	0.670467	1
F41G4.2	cas-1	WBGene00000294	0.0708143	6.64549	0.655259	1	cas-1 encodes the C. elegans homologue of the adenylyl cyclase-associated protein 1 (CAP1); as loss of cas-1 activity via large-scale RNAi screens results in no obvious defects, the precise role of cas-1 in C. elegans development and/or behavior is not yet known.
C18E3.6	cas-2	WBGene00015975	-0.0766856	3.51927	0.660088	1
K07C5.8	cash-1	WBGene00010631	0.0288932	7.21417	0.869883	1	cash-1 encodes an ortholog of Drosophila CKA and the human striatins STRN, STRN3, and STRN4 that is required for vulval development; CASH-1 has an N-terminal region which may bind caveolin or calmodulin, and a C-terminal region with five tandem WD domains; by its orthology with CKA and striatins, CASH-1 is predicted to act as a scaffold linking signal transduction proteins (such as JKK-1 and JNK-…
B0034.3	casy-1	WBGene00000403	-0.0652482	9.03475	0.684527	1	casy-1 encodes a type I transmembrane protein with two extracellular cadherin domains and an LG/LNS domain that is the sole C. elegans calsyntenin/alcadein ortholog; genetic studies indicate that in C. elegans casy-1 activity is required, in parallel to the insulin-like signaling pathway, for several types of learning, including salt chemotaxis learning, temperature learning, olfactory adaptation…
W01C8.6	cat-1	WBGene00000295	0.0788665	4.13987	0.644084	1	cat-1 encodes a synaptic vesicular monoamine transporter required for the presence of dopamine and serotonin in nerve terminals, for the normal slowing of worms on a bacterial lawn (versus clean agar), for faster pharyngeal pumping on food, and for a normally (high) rate of egg-laying.
B0432.5	cat-2	WBGene00000296	-0.0865625	2.74505	0.754194	1	cat-2 encodes a tyrosine hydroxylase, the rate-limiting enzyme in the synthesis of catecholamines, such as dopamine; mutations in cat-2 affect dopamine levels that in turn affect locomotory slowing in response to food; CAT-2 demonstrates tyrosine hydroxylase activity in vitro, and this activity can be regulated, in vitro, by phosphorylation of CAT-2 Ser35 by protein kinase A; CAT-2 activity does …
F32G8.6	cat-4	WBGene00000298	0.017875	5.65038	0.925447	1	cat-4 encodes an ortholog of the human GTP cyclohydrolase I gene (GCH1; OMIM:600225), which when mutated leads to dystonia; CAT-4 is involved in serotonin and dopamine biosynthesis that affects movement, mating behavior, foraging behavior, and cell migration; CAT-4 acts in the same genetic pathway as flp-1.
Y105E8A.12	catp-1	WBGene00013672	0.469735	5.36925	0.00218716	0.0347462	catp-1 encodes an alpha subunit of the Na+/K+- and H+/K+-pump P-type ATPase family; catp-1 was identified in screens for animals resistant to developmental defects seen in larvae treated with the nicotinic agonist DMPP; genetic analyses indicate that catp-1 likely functions together with the let-60/Ras and daf-2/insulin-like receptor signaling pathways to regulate L2 larval developmental timing a…
C02E7.1	catp-2	WBGene00015338	0.703452	0.903368	0.409026	0.97396
C09H5.2	catp-3	WBGene00015660	0.0936267	4.42263	0.804239	1
C01G12.8	catp-4	WBGene00007248	0.168989	1.79786	0.768326	1
K07E3.7	catp-5	WBGene00019493	0.270998	5.6762	0.113906	0.578273
W08D2.5	catp-6	WBGene00012341	0.00960704	6.68805	0.955425	1	catp-6 encodes a predicted lysosomal P-type transmembrane cation transporting ATPase orthologous to human ATP13A2/PARK9 and yeast Ypk9; catp-6 is an essential gene: loss-of-function catp-6 mutations result in embryonic lethality at the one-cell stage and maternal sterility; catp-6 mutation can also result in nicotine hypersensitivity and catp-6 interacts genetically with human alpha-synuclein; wh…
Y59H11AR.2	catp-7	WBGene00022010	0.0786106	7.67701	0.658287	1
C10C6.6	catp-8	WBGene00007514	0.310454	6.74837	0.0977878	0.528292
T13F2.8	cav-1	WBGene00000301	1.41417	6.0055	6.25413e-06	0.000268308	cav-1 encodes one of two C. elegans caveolin orthologs; cav-1 is required for viability and Ras/MAP-kinase-dependent progression through the meiotic cell cycle; CAV-1 is expressed in the adult germ line and during embryonic development; CAV-1::GFP localizes to cortical granules that function to secrete chondroitin and mucin-like proteoglycans to the extracellular space following fertilization.
C56A3.7	cav-2	WBGene00000302	-0.187828	4.42865	0.396078	0.964335	cav-2 encodes one of two C. elegans proteins related to caveolins, integral transmembrane proteins that are believed to function in regulation of signal transduction and that are the major component of caveolae, specialized lipid rafts found in the plasma membrane of most cell types; as loss of cav-2 function via large-scale RNA-mediated interference (RNAi) screens does not result in any obvious …
H02I12.1	cbd-1	WBGene00010351	0.573881	3.87291	0.0176578	0.170305	cbd-1 encodes a large (1319-residue) protein with 12 chitin-binding peritrophin-A domains; cbd-1(RNAi) animals have an osmotically-sensitive embryonic lethal phenotype, perhaps because of defects in chitin and eggshell synthesis; like CEJ-1 and CPG-2, CBD-1 may participate in eggshell synthesis and early embryonic development; CBD-1's multiple peritrophin-A domains might enable mechanical cross-l…
C12C8.2	cbl-1	WBGene00007533	0.148311	3.45256	0.655902	1	cbl-1 encodes a putative cystathionine gamma-lyase orthologous to human CTH (OMIM:607657, mutated in cystathioninuria), and paralogous to CTH-1 and CTH-2; CBL-1, unlike its paralog CTH-2, does not inhibit DHC-1 in vivo.
ZK546.17	cblc-1	WBGene00022766	0.410438	6.29638	0.119427	0.594954
K01A2.11	cbn-1	WBGene00019285	0.928323	3.85014	6.94647e-07	3.88788e-05	cbn-1 encodes a protein that contains a predicted signal peptide and calcium-binding EF-hand motifs.
R10E11.1	cbp-1	WBGene00000366	0.00844508	8.6571	0.966982	1	cbp-1 encodes a homolog of the mammalian transcriptional cofactors CBP (OMIM:600140) and p300 (E1A-BINDING PROTEIN, 300-KD; OMIM:602700) that have been shown to possess histone acetyltransferase activity, and which, when mutated, lead to Rubinstein-Taybi syndrome (OMIM:180849) and colorectal cancer (OMIM:114500); at least one splicing form of CBP-1 exhibits histone acetyltransferase (HAT) activit…
K03H1.10	cbp-2	WBGene00010545	-0.491228	4.43776	0.0120092	0.128422
ZC373.1	cbs-1	WBGene00013866	0.646751	5.4707	0.000593324	0.0122088	cbs-1 encodes an ortholog of human CYSTATHIONINE-BETA-SYNTHASE (CBS), which when mutated leads to homocystinuria (OMIM:236200).
F54A3.4	cbs-2	WBGene00018783	1.06542	2.0369	0.22061	0.794626	The F54A3.4 gene encodes a homolog of the human gene CBS, which when mutated leads to homocystinuria (OMIM:236200).
C54D2.5	cca-1	WBGene00000367	-0.118633	6.76161	0.535204	1	cca-1 encodes a calcium channel alpha subunit that is homologous to vertebrate T-type calcium channel alpha 1 subunits; CCA-1 is required for regulation of pharyngeal pumping, specifically for the efficient initiation of action potentials in the pharynx in response to excitatory inputs; a CCA-1::GFP fusion protein is expressed strongly in pharyngeal muscle as well as in many neurons, including pa…
T28F2.5	ccb-1	WBGene00000368	-0.101965	6.19007	0.534328	1	ccb-1 encodes a beta subunit of a voltage-gated calcium channel; recordings of voltage-dependent calcium currents indicate that CCB-1 regulates voltage dependence, kinetics, and conductance of the EGL-19 alpha1 subunit of the body wall muscle voltage-dependent calcium channel; a ccb-1::gfp promoter fusion is expressed in most neurons and muscle cells types.
W10C8.1	ccb-2	WBGene00021125	-0.00213809	1.58847	1	1	ccb-2 encodes a beta subunit of a voltage-gated calcium channel; a ccb-2::gfp promoter fusion is expressed in a few neurons in the head and in the ventral cord neurons.
F38B7.1	ccch-1	WBGene00009532	-0.298078	8.81747	0.139433	0.643566	ccch-1 encodes a CCCH tandem zinc finger (TZF) protein; based upon its sequence similarity to human tristetraprolin and ERF-2 the product of F38B7.1 is predicted to function as an RNA-binding protein that specifically binds to UAUU repeats.
F38C2.5	ccch-2	WBGene00009537	0.759851	0.692798	0.147334	0.665178	F38C2.5 encodes a CCCH tandem zinc finger (TZF) protein; based upon its sequence similarity to C. elegans POS-1, the product of F38C2.5 is predicted to function as an RNA-binding protein.
W05B10.2	ccch-3	WBGene00012277	0.126579	3.19369	0.498311	1
Y57G11C.25	ccch-5	WBGene00013319	0.403384	1.02051	0.351107	0.933218	Y57G11C.25 encodes a CCCH tandem zinc finger (TZF) protein; based upon its sequence similarity to C. elegans POS-1, the product of Y57G11C.25 is predicted to function as an RNA-binding protein.
Y49E10.23	cccp-1	WBGene00013042	0.100935	5.22347	0.63514	1
ZK1058.4	ccdc-47	WBGene00014204	-0.164947	7.75452	0.450617	0.989357
C16C10.6	ccdc-55	WBGene00007627	-0.0626823	5.14591	0.840742	1	ccdc-55 encodes a conserved coiled-coil domain-containing protein that is related to the mammalian nuclear speckle splicing regulatory proteins 1 (NSrp1s); in C. elegans, CCDC-55 activity is required for early larval development and also for distal tip cell (DTC) migration; cell type-specific RNAi experiments suggest that CCDC-55 functions within the DTC to regulates its migration; genetic intera…
Y47G6A.17	ccep-290	WBGene00021643	-0.0460266	4.06911	0.843456	1
Y56A3A.20	ccf-1	WBGene00000369	0.176854	6.40816	0.235005	0.815947	a homolog of subunit 7 of CCR4-NOT transcription complex from S. cerevisiae.
Y73F8A.6	ccg-1	WBGene00000370	-0.38354	8.18877	0.0316051	0.259079
T06D8.6	cchl-1	WBGene00011527	0.0495227	6.49961	0.739888	1	cchl-1 encodes a cytochrome C-type heme lyase; by homology, CCHL-1 is predicted to covalently attach heme to cytochrome c; loss of cchl-1 activity results in longer lifespan.
C14A4.11	ccm-3	WBGene00007561	0.126002	5.17544	0.411088	0.974034	ccm-3 encodes a protein with similarity to vertebrate programmed cell death protein 10, also known as TFAR15 or CCM3, which is associated with cerebral cavernous malformations type 3 (OMIM:603285); in C. elegans, deletion mutations in ccm-3 are associated with sterility and lethality and large-scale RNAi experiments targeting ccm-3 result in embryonic lethality, body morphology defects, and mater…
F43D2.1	ccnk-1	WBGene00009650	-0.0415034	4.87208	0.837658	1
F26E4.9	cco-1	WBGene00000371	-0.15254	8.97568	0.471996	0.996589	cco-1 encodes the ortholog of the nuclear-encoded cytochrome c oxidase-1 subunit Vb/COX4, a component of the electron transport chain in mitochondria; knock-down of cco-1 via RNA interference in specific tissues like body wall muscle decreases life span, whereas knock-down in the nervous system and intestine increases life-span; the effects of cco-1 on life span indicate that the electron transpo…
Y37D8A.14	cco-2	WBGene00012553	-0.0743955	9.33185	0.722864	1	cco-2 encodes the C. elegans ortholog of the cytochrome c oxidase (COX) subunit Va (COX Va); loss of cco-2 activity via RNAi results in a shortened life span, reduced fertility, and defects in mitochondrial respiratory chain function.
F56H1.5	ccpp-1	WBGene00018995	-0.112185	5.78415	0.487285	1	ccpp-1 encodes a putative ATP/ADP-activated metallocarboxypeptidase that may function in vivo as an alpha-tubulin C-terminal tyrosine carboxypeptidase; CCPP-1 is orthologous to murine AGTPBP-1/Nna1/pcd (upregulated in damaged mouse spinal cord and mutated in Purkinje cell degeneration) and human AGTPBP1 (OMIM:606830); murine AGTPBP-1 is genetically required for tubulin carboxypeptidase activity i…
EEED8.6	ccpp-6	WBGene00017136	-0.202478	3.01376	0.3318	0.91766	ccpp-6 encodes an ATP/ADP-activated metallocarboxypeptidase, orthologous to mammalian AGBL4 proteins, that may function in vivo as an alpha-tubulin C-terminal tyrosine carboxypeptidase; recombinant CCPP-6 is active in vitro on several different C-terminal amino acids of synthetic peptide substrates (with carboxypeptidase A- and B-like, but not O-like specificity); unlike most carboxypeptidases, b…
ZC518.3	ccr-4	WBGene00000376	-0.00250983	7.13105	0.989259	1
T05C12.7	cct-1	WBGene00000377	0.18587	8.63064	0.248254	0.830732	cct-1 encodes a putative alpha subunit of the eukaryotic cytosolic ('T complex') chaperonin, orthologous to human TCP1 (OMIM:186980), and required for normal pronuclear-centrosome rotation, positioning of the mitotic spindle, meiosis, and distal tip cell migration; CCT-1 is also required to repress SKN-1-dependent transcription of gst-4, and for fertility and viability; CCT-1 is expressed in larv…
T21B10.7	cct-2	WBGene00000378	0.210776	8.15047	0.19116	0.74859	cct-2 encodes a putative beta subunit of the eukaryotic cytosolic ('T complex') chaperonin, orthologous to human CCT2 (OMIM:605139); CCT-2 is expressed in most, if not all, tissues; CCT-2 represses SKN-1-dependent transcription of gst-4; CCT-2 is expressed in touch receptor neurons in a MEC-3-dependent fashion; in mass RNAi assays, CCT-2 is required for normal transgene repression and subcellular…
F54A3.3	cct-3	WBGene00018782	-0.125859	8.49209	0.547541	1	cct-3 encodes a putative gamma subunit of the eukaryotic cytosolic ('T complex') chaperonin, orthologous to human CCT3 (OMIM:600114); in early embryos, CCT-3 is required for normally fast microtubule elongation; CCT-3 is also required to repress SKN-1-dependent transcription of gst-4; in mass RNAi assays, CCT-3 is required for normal embryonic and larval viability, and for fertility.
K01C8.10	cct-4	WBGene00000379	0.108501	8.48281	0.600193	1	cct-4 encodes a putative delta subunit of the eukaryotic cytosolic ('T complex') chaperonin, orthologous to human CCT4 (OMIM:605142); CCT-4 represses SKN-1-dependent transcription of gst-4; CCT-4 is expressed in pharynx, pharyngeal gland cells, intestine, renal gland cells, and neurons; CCT-4 is expressed in touch receptor neurons in a MEC-3-dependent fashion.
C07G2.3	cct-5	WBGene00000380	-0.0640122	9.14118	0.678976	1	cct-5 encodes, by alternative splicing, two isoforms of a putative epsilon subunit of the eukaryotic cytosolic ('T complex') chaperonin, orthologous to human CCT5 (OMIM:610150, mutated in sensory neuropathy with spastic paraplegia); CCT-5 represses SKN-1-dependent transcription of gst-4; in mass RNAi assays, cct-5 is required for normal embryonic osmotic integrity, transgene subcellular localizat…
F01F1.8	cct-6	WBGene00000381	0.4659	8.00001	0.00221262	0.0350064	cct-6 encodes, by alternative splicing, two isoforms of a putative zeta subunit of the eukaryotic cytosolic ('T complex') chaperonin, orthologous to human CCT6A (OMIM:104613); CCT-6 represses SKN-1-dependent transcription of gst-4; CCT-6 is expressed in a few cells of pre-comma stage embryos; in mass RNAi assays, CCT-6 is required for normally short life span, and for normal transgene subcellular…
T10B5.5	cct-7	WBGene00020391	0.186396	8.51903	0.303245	0.895603	cct-7 encodes a putative eta subunit of the eukaryotic cytosolic ('T complex') chaperonin, orthologous to human CCT7 (OMIM:605140); CCT-7 is expressed in most, if not all, tissues; in mass RNAi assays, CCT-7 is required for normal transgene repression and subcellular localization, embryonic and larval viability, fertility, vulval development, and normal locomotion.
Y55F3AR.3	cct-8	WBGene00021934	0.360864	7.07347	0.0245243	0.216658	cct-8 encodes a putative theta subunit of the eukaryotic cytosolic ('T complex') chaperonin, orthologous to human CCT8, ENSG00000020219, and CCT8L2/KCNMB3L; in mass RNAi assays, CCT-8 is required for transgene repression, distal tip cell migration, embryonic and larval viability, fertility, normal body coloration, locomotion, and vulval development, and normally rapid growth.
F58G11.6	ccz-1	WBGene00010283	0.0334701	4.69384	0.814648	1	ccz-1 encodes an ortholog of human C7orf28A and C7orf28B, with more distant similarity to human HPS4 (OMIM:606682) and S. cerevisiae Ccz1p in its N-terminal CHiPS domain; the CHiPS domain of CCZ-1 is predicted to have a longin-like fold; CCZ-1 is required for digestion of apoptotic corpses, specifically for phagosome maturation via exchange of the RAB-7 GTPase for the RAB-5 GTPase on the maturing…
C17G10.4	cdc-14	WBGene00000383	-0.0631165	7.66631	0.742808	1	cdc-14 encodes a dual-specificity phosphatase, homologous to Cdc14p in S. cerevisiae; cdc-14 regulates developmental cell cycle arrest during post-embryonic development; in regulating cell cycle arrest, CDC-14 appears to function via regulation of CKI-1 levels in the nucleus; CDC-14 is widely expressed and its localization is dynamic, localizing to the cytoplasm during the G1 phase of the cell cy…
K06A5.7	cdc-25.1	WBGene00000386	-0.013084	4.38852	0.936938	1	cdc-25.1 encodes a CDC25 phosphatase homolog that affects embryonic viability, meiosis, mitosis, proliferation of the intestine (E cell lineage), and germ line proliferation; it is expressed in the developing germline, in the nuclei of oocytes, embryonic nuclei, nuclei of embryonic cortical membranes, and sperm pronuclei, and in the germline precursors Z2 and Z3.
F16B4.8	cdc-25.2	WBGene00000387	0.567398	3.40424	0.018133	0.173508	cdc-25.2 encodes a putative homolog of Cdc25 phosphatase protein family that affects germline proliferation.
ZK637.11	cdc-25.3	WBGene00000388	1.19482	0.887445	0.0387445	0.295622	cdc-25.3 encodes a tyrosine phosphatase that is a member of the cell division cycle 25 (CDC25) family of cell cycle regulators that includes Schizosaccharomyces pombe CDC25 and Drosophila string; cdc-25.3 is one of four cdc-25 genes in C. elegans and while it is known to be expressed in hermaphrodites, the precise function of cdc-25.3 is not yet clear; cdc-25.3 may function redundantly with cdc-2…
B0511.9	cdc-26	WBGene00015235	0.0197178	4.66052	0.90192	1	cdc-26 encodes, by alternative splicing, two isoforms of a probable anaphase-promoting complex/cyclosome (APC/C) component that has cryptic orthology to budding yeast Cdc26p, and that is required for normal meiosis and asymmetric one-cell embryonic division; although CDC-26 and Cdc26p have little obvious sequence similarity, they do share a common motif in their N-terminal domains, and yeast cdc2…
W08F4.8	cdc-37	WBGene00021097	0.180763	5.48444	0.273762	0.860504
R07G3.1	cdc-42	WBGene00000390	0.0647076	8.13614	0.693822	1	cdc-42 encodes a RHO GTPase; cdc-42 controls polarity of both individual cells and developing embryos by regulating the localization of PAR proteins; cdc-42 is also required for regulation of receptor-mediated endocytosis; CDC-42 is widely expressed and localizes to a number of different locations, including the cell cortex, centrosomes, recycling endosomes, and at the time of hypodermal cell fus…
C06A1.1	cdc-48.1	WBGene00007352	0.15778	7.27329	0.343962	0.927966	cdc-48.1 encodes a type II AAA ATPase, homologous to yeast Cdc48 and mammalian p97/VCP, that functions as a ubiquitin-selective chaperone; cdc-48.1 acts redundantly with cdc-48.2 and in conjunction with ufd-1 and npl-4 in endoplasmic reticulum-associated protein degradation (ERAD); in addition, CDC-48.1, UFD-2 and chn-1 function together to regulate myosin assembly and muscle formation via the UN…
C41C4.8	cdc-48.2	WBGene00008053	0.209058	6.35422	0.204972	0.771551	cdc-48.2 encodes a AAA (ATPase associated with various cellular activities) ATPase that is one of two C. elegans p97/VCP/CDC48 homologs; cdc-48.2 acts redundantly with cdc-48.1 in endoplasmic reticulum-associated protein degradation (ERAD); in addition, cdc-48.1 and cdc-48.2 together provide an essential function during embryonic development; CDC-48.2 exhibits ATPase activity when expressed in vi…
K04G2.3	cdc-48.3	WBGene00010562	-0.316713	5.38156	0.203742	0.768575
D1081.8	cdc-5L	WBGene00008386	-0.0212815	6.42593	0.927606	1
C43E11.10	cdc-6	WBGene00000382	0.322708	4.45371	0.0376618	0.289425	cdc-6 encodes a homolog of an origin complex component (CDC6) which in yeast controls the start of DNA replication, and also has a distant paralog (Y39A1A.12) within the C. elegans genome; CDC-6 is superficially dispensable for embryonic viability, perhaps because of redundancy with Y39A1A.12.
C34G6.5	cdc-7	WBGene00016421	-0.135376	2.0013	0.619778	1
F35F11.1	cdc-73	WBGene00018064	-0.0131962	4.58711	0.938308	1	cdc-73 encodes the C. elegans ortholog of mammalian and Saccharomyces cerevisiae CDC73/Parafibromin that is a member of the PAF1 (Polymerase-Associated Factor 1) complex; by homology CDC-73 is predicted to function in the regulation of transcription.
C47D2.2	cdd-1	WBGene00000391	0.629583	4.12417	0.0174386	0.168638	cdd-1 encodes a cytidine deaminase that contains a zinc-binding region; CDD-1 exhibits deoxycytidine deaminase activity when expressed in vitro, and is able to bind AU-rich RNA sequences in vitro; a cdd-1::lacZ reporter fusion is expressed at highest levels in early larvae and is seen predominantly in the intestine and pharynx.
F49E8.4	cdd-2	WBGene00000392	0.0628789	3.45517	0.77251	1	A functional cytidine deaminase that affects morphology of embryos; it is expressed at all life cycle stages.
C15B12.7	cdf-1	WBGene00000393	0.289075	5.91223	0.0797481	0.466436	cdf-1 encodes a protein similar to members of the cation diffusion facilitator (CDF) family of transmembrane proteins and is most similar to vertebrate ZnT-1; two other elegans CDF proteins, cdf-2 and sur-7 have also been identified; CDF proteins regulate the transport of heavy metal ions like zinc; cdf-1 positively regulates Ras-mediated signaling during vulval development, most likely by promot…
T18D3.3	cdf-2	WBGene00011821	0.129245	4.69783	0.569681	1	cdf-2 encodes a protein similar to members of the cation diffusion facilitator (CDF) family of transmembrane proteins and is most similar to vertebrate ZnT-2; two other elegans CDF proteins, cdf-1 and sur-7 have also been identified; CDF proteins regulate the transport of heavy metal ions like zinc; cdf-2 responds to dietary zinc as cdf-2 transcript levels can be correlated with dietary zinc conc…
C33H5.18	cdgs-1	WBGene00016384	-0.180973	7.13941	0.317241	0.909386	C33H5.18 encodes a CDP-diglyceride synthetase ortholog required for locomotion and osmoregulation; given its biochemical function in other organisms, C33H5.18 is expected to catalyse synthesis of cytidine diphosphate-diacylglycerol (CDP-DAG), an activated precursor for anionic and zwitterionic phospholipids, and is likely to regulate phosphatidylinositol lipid signalling; one might expect loss of…
R10F2.1	cdh-1	WBGene00019994	0.0427659	5.83903	0.861727	1	cdh-1 encodes a cadherin that is similar, in the extracellular domain, to the Drosophila cadherin Dachsous (Ds); although the precise role of cdh-1 in C. elegans development and/or behavior is not yet known, loss of cdh-1 activity via RNAi using the hypersensitive rrf-3 strain can result in locomotion and growth defects, as well as larval lethality.
C45G7.5	cdh-10	WBGene00000402	-0.224134	4.87126	0.422575	0.979066	cdh-10 encodes a member of the cadherin superfamily.
Y71D11A.1	cdh-12	WBGene00022103	0.341844	4.08291	0.398857	0.966622	cdh-12 encodes a cadherin; by sequence similarity, CDH-12 is predicted to function in cellular adhesion.
ZK112.7	cdh-3	WBGene00000395	0.0779014	4.39088	0.797497	1	cdh-3 encodes a member of the cadherin superfamily that affects morphogenesis of tail epithelia and excretory function; expressed predominantly in developing epithelial cells, and also expressed in the AC, excretory cell, various neurons, and vulval cells during different stages of development.
F25F2.2	cdh-4	WBGene00000396	0.164941	7.28848	0.457895	0.993454	cdh-4 encodes a Fat-like cadherin homolog; CDH-4 is required for axon fasciculation, cell migration, and hypodermis and pharyngeal development; in addition, CDH-4 functions together with the FMI-1 flamingo-like cadherin to regulate development of the GABAergic VD motorneurons; cdh-4 is widely expressed beginning early in development, but by the L3 larval stage expression is confined to the VD GAB…
F08B4.2	cdh-5	WBGene00000397	0.353286	3.35729	0.134423	0.632478	a homolog of cadherin.
R05H10.6	cdh-7	WBGene00000399	0.313554	2.34274	0.611616	1	cdh-7 encodes a protein that contains a cadherin domain.
F18F11.3	cdh-8	WBGene00017576	0.365802	3.02075	0.243892	0.825751	cdh-8 encodes a cadherin that may be nematode specific; CDH-8 is predicted to function as a membrane protein that plays a role in cell adhesion and/or morphogenesis, but as loss of cdh-8 activity via mutation or large-scale RNAi experiments results in no obvious abnormalities, the precise role of cdh-8 in C. elegans development and/or behavior is not yet known.
F59C12.1	cdh-9	WBGene00000401	-0.0294576	2.8614	0.895928	1	cdh-9 encodes a member of the cadherin superfamily of transmembrane glycoproteins that mediate homophilic cell-cell adhesion; as loss of CDH-9 activity via RNA-mediated interference (RNAi) does not result in any abnormalities, the precise role of CDH-9 in C. elegans development and/or behavior is not yet known.
T05G5.3	cdk-1	WBGene00000405	0.696872	4.60008	0.000912588	0.017202	cdk-1 encodes a cyclin-dependent kinase, orthologous to and functionally interchangeable with CDC28 from S. cerevisiae; CDK-1 is required for cell-cycle progression through M phase in both meiosis and mitosis; in regulating progression through meiosis and the oocyte-to-egg transition, CDK-1 functions to regulate the activity of the MBK-2 DYRK2 family kinase that phosphorylates a number of substra…
B0285.1	cdk-12	WBGene00007135	0.00995986	5.23411	0.954312	1
K03E5.3	cdk-2	WBGene00019362	-0.125052	3.66119	0.50735	1	cdk-2 encodes the C. elegans ortholog of cyclin-dependent kinase 2; along with CYE-1 (cyclin E), CDK-2 is required for the G1/S transition in somatic cells, centrosome assembly and polarity establishment in the embryo, proliferation of germ cells, and suppression of terminal differentiation in quiescent cells after asymmetric division; CYE-1 and CDK-2 also regulate the germline mitosis/meiosis de…
F18H3.5	cdk-4	WBGene00000406	0.195174	3.7822	0.268921	0.853695	cdk-4 encodes two isoforms of a cyclin-dependent serine/threonine protein kinase orthologous to human CDK4 and CDK6 (OMIM:123829 and OMIM:603368, mutated in cutanous malignant melanoma) which complex with D-type cyclins to regulate progression through the G1 phase of the cell cycle; CDK-4 activity is essential for G1 progression in postembryonic blast cells and as a result, cdk-4 mutant animals g…
T27E9.3	cdk-5	WBGene00000407	0.133184	5.08369	0.541194	1	cdk-5 encodes a proline-directed protein serine/threonine kinase homologous to cyclin dependent kinase 5 (CDK5); in ventral cord interneurons, CDK-5 activity regulates the subcellular localization of LIN-10 which, in turn, regulates the synaptic localization of the GLR-1 glutamate receptor; cdk-5 also regulates the polarized distribution of neuropeptide-containing dense core vesicles in cholinerg…
Y39G10AL.3	cdk-7	WBGene00000408	0.218582	4.45402	0.168495	0.707997	The cdk-7 gene encodes a cyclin-dependent kinase orthologous to human CDK7 (OMIM:601955) that is a component of the general transcription factor IIH (TFIIH) complex; CDK-7 is required during embryogenesis for mRNA transcription and phosphorylation of RNA polymerase II on serine 2 and serine 5, as well as for cell cycle progression, maintenance of ploidy, and completion of meiosis following fertil…
F39H11.3	cdk-8	WBGene00000409	0.0673554	4.26663	0.735931	1	cdk-8 encodes a member of the cyclin-dependent serine/threonine protein kinase family orthologous to human CDK8 (OMIM:603184) which functions in transcriptional regulation with the positive regulatory factor cyclin C, is associated with the RNA polymerase II holoenzyme, and may regulate gene-specific activators; CDK-8 also contains a glutamine/asparagine-rich domain; loss of cdk-8 function via RN…
H25P06.2	cdk-9	WBGene00000410	-0.0344745	5.30464	0.817634	1	cdk-9 encodes an ortholog of the metazoan transcription elongation factor kinase CDK-9; it is required for general expression of early embryonic genes, and thought (in conjunction with partners such as cyclin T) to form a transcription factor (P-TEFb) that which prevents transcription from stalling in vitro.
T23F11.3	cdka-1	WBGene00011955	0.0463029	6.27178	0.790618	1	cdka-1 encodes the C. elegans ortholog of the cyclin-dependent kinase 5 (CDK5) activator p35/Nck5a; cdka-1 activity is required to prevent convulsions induced by exposure to the GABA antagonist pentylenetetrazole (PTZ); in addition, cdka-1 is required for normal distribution of GABA-containing synaptic vesicles in the ventral nerve cord and for regulation of localization of LIN-10 in response to …
Y42A5A.4	cdkl-1	WBGene00012779	-0.00779812	3.61674	0.965422	1
Y113G7B.16	cdkr-3	WBGene00013765	0.0769942	4.90838	0.657075	1
R06F6.1	cdl-1	WBGene00000411	0.730651	5.23318	0.000147217	0.00384202	cdl-1 encodes a homolog of human hairpin (stem-loop) binding proteins (HBP/SLBP) that bind to the hairpin (stem-loop) structure in the 3' untranslated region (3' UTR) of histone mRNAs, and thus promote histone pre-mRNA processing and translation of mature histone mRNA; CDL-1 is required for normally high levels of histone gene expression, normal cell division during late larval development, embry…
F56F10.3	cdo-1	WBGene00018986	0.877353	4.47405	0.000448572	0.00983075	cdo-1 encodes the C. elegans cysteine dioxygenase ortholog; by homology to mammalian enzymes, CDO-1 is predicted to function in cysteine catabolism by catalyzing the oxidation of cysteine to cysteine sulfanate.
F35E8.11	cdr-1	WBGene00000412	2.57741	3.63458	2.33088e-10	3.92581e-08	cdr-1 encodes a member of the cadmium-inducible lysosomal family that affects susceptibility to cadmium toxicity; expressed in intestinal cells.
C54D10.1	cdr-2	WBGene00008296	-0.0199514	4.69029	0.963426	1	cdr-2 encodes a predicted transmembrane protein that is a member of the CDR (cadmium responsive) family of proteins; cdr-2 expression is increased upon exposure to cadmium ions, and loss of cdr-2 activity results in increased sensitivity to cadmium.
C54D10.2	cdr-3	WBGene00008297	NA	NA	NA	NA	cdr-3 encodes a predicted transmembrane protein that is a member of the CDR (cadmium responsive) family of proteins; cdr-3 expression is increased upon exposure to cadmium ions.
K01D12.11	cdr-4	WBGene00010470	0.879968	5.68952	0.0056784	0.0730998	cdr-4 encodes a predicted transmembrane protein that is a member of the CDR (cadmium responsive) family of proteins; cdr-4 expression is upregulated in response to cadmium treatment.
K01D12.12	cdr-6	WBGene00010471	2.34337	7.64629	8.17094e-06	0.000334751	cdr-6 encodes a predicted transmembrane protein that is a member of the C. elegans CDR (cadmium responsive) family of proteins; loss of cdr-6 activity results in shortened lifespan, but has no effect on sensitivity to cadmium or other metals; cdr-6 is expressed postembryonically in pharyngeal and intestinal cells, as well as the rectal gland cell.
K01D12.13	cdr-7	WBGene00010472	1.29945	2.63602	0.000849129	0.0163273
Y54E10A.15	cdt-1	WBGene00000413	0.174034	4.35101	0.470464	0.995623	cdt-1 encodes the C. elegans ortholog of the replication-licensing factor Cdt1; CDT-1 activity is essential for DNA replication; CDT-1 levels are negatively regulated by a CUL-4-containing ubiquitin ligase complex.
T01C3.1	cdt-2	WBGene00011318	0.237319	3.28942	0.267442	0.851939
D1005.3	cebp-1	WBGene00016997	0.430938	5.97241	0.130067	0.621958	cebp-1 encodes a bZip domain-containing protein that is a member of the CCAAT/enhancer-binding proteins (C/EBP) subfamily of bZip proteins; in C. elegans, CEBP-1 functions together with a DLK-1 signaling pathway to effect axon regeneration after laser axotomy in adult neurons; cebp-1 protein and mRNA are located in synapses and axons, and translation of axonal cebp-1 mRNA is upregulated via the D…
C48E7.11	cebp-2	WBGene00016754	0.147352	2.12876	0.580148	1
ZK1236.2	cec-1	WBGene00000414	-0.359223	6.9873	0.060823	0.398262	cec-1 encodes a nuclear protein with a chromodomain that is ubiquitously expressed in somatic cells, but is dispensable for embryonic survival or gross adult morphology.
ZK973.2	cec-10	WBGene00022831	-0.0656371	5.4207	0.662792	1
C50A2.2	cec-2	WBGene00016796	-0.0482469	4.73297	0.732717	1
T09A5.8	cec-3	WBGene00011636	0.168628	4.95516	0.287899	0.878671
F32E10.2	cec-4	WBGene00017990	0.326654	3.65396	0.07782	0.460572
F32E10.6	cec-5	WBGene00017993	0.244695	6.26256	0.171634	0.714911
T12E12.2	cec-6	WBGene00020463	-0.20563	4.71826	0.12361	0.60469
Y37D8A.11	cec-7	WBGene00012551	0.0477132	3.6348	0.819198	1
Y55B1BR.3	cec-8	WBGene00021913	0.199184	3.49071	0.242429	0.824103
C29H12.5	cec-9	WBGene00016236	-0.27708	2.19879	0.170627	0.712839
Y47H9C.4	ced-1	WBGene00000415	-0.163525	6.49471	0.328082	0.914598	ced-1 encodes a single-pass transmembrane protein homologous to human CD91, a low density lipoprotein receptor; CED-1 is a component of the apoptotic pathway and functions to initiate a signaling pathway in phagocytic cells that promotes cell corpse engulfment, phagosome maturation as evidenced by enrichment of PtdIns(3)P, DYN-1, and RAB-5 on phagosomal surfaces and, ultimately, apoptotic cell de…
C09G12.8	ced-10	WBGene00000424	-0.0321318	6.51442	0.838739	1	ced-10 encodes a GTPase orthologous to human RAC1 (OMIM:602048) that is required for phagocytosis during programmed cell death and for migration of the distal tip cells of the somatic gonad; CED-10 functions in the engulfing cell during apoptosis, and is activated by a complex of CED-2(CrkII) and CED-5(DOCK180) to promote formation of the polarized cell extensions associated with cell corpse engu…
ZK512.3	ced-11	WBGene00000425	0.352966	4.02915	0.144848	0.658532	The ced-11 gene encodes a predicted transmembrane ion channel related to the long transient receptor potential channel (LTRPC) subfamily of TRP channels found in Drosophila and mammals; CED-11 functions as a downstream effector in the programmed cell death pathway and may play a role in affecting the morphological changes seen in the nucleus, cytoplasm, and plasma membrane of apoptotic cells.
Y106G6E.5	ced-12	WBGene00000426	-0.0445245	5.68646	0.800623	1	ced-12 encodes the C. elegans ELMO ortholog; ced-12 is required both for phagocytotic engulfment of apoptotic cells, and for normal migrations of healthy cells during development; CED-12 binds directly to CED-5, the C. elegans DOCK180 ortholog.
R09F10.9	ced-13	WBGene00000427	NA	NA	NA	NA	ced-13 encodes a 98-residue protein with a single BH3 domain, whose overexpression promotes CED-3/4-dependent apoptosis; CED-13 binds the Bcl-2 ortholog CED-9, and ced-13 is transcriptionally activated by the p53 ortholog CEP-1, and the ced-13 promoter contains several potential p53-binding sites; ced-13 mutations are mostly indistinguishable from wild-type, but may enhance the abnormal response …
Y41D4B.13	ced-2	WBGene00000416	0.0660266	4.71101	0.653815	1	The ced-2 gene encodes a Src homology (SH) 2 and 3-containing adaptor protein, homologous to human CrkII, that is required for phagocytosis during programmed cell death and for migration of the distal tip cells of the somatic gonad; CED-2 functions in the engulfing cell during apoptosis and interacts with CED-5/DOCK180 to activate CED-10/Rac and promote formation of the polarized cell extensions …
C48D1.2	ced-3	WBGene00000417	0.352819	3.5511	0.11621	0.585231	ced-3 encodes a caspase, a cysteine-aspartate protease; CED-3 activity is required for execution of apoptosis and functions in a conserved genetic pathway with CED-4, CED-9, and EGL-1 to regulate apoptosis during C. elegans development.
C35D10.9	ced-4	WBGene00000418	-0.0577596	4.3183	0.706219	1	ced-4 encodes a novel protein; along with CED-3, CED-4 is required for the initiation of programmed cell death; accordingly, genetic analyses indicate that ced-3 and ced-4 function upstream of ced-1, ced-2, and nuc-1 in the programmed cell death pathway; in yeast two-hybrid experiments, and upon coexpression in mammalian cells, CED-4 interacts with CED-9, an anti-apoptotic BCL-2 homolog; coexpres…
C02F4.1	ced-5	WBGene00000419	-0.1315	6.39625	0.486666	1	ced-5 encodes a homolog of the human protein DOCK180; ced-5 is required for the cell engulfment stage of programmed cell death, and physically interacts with CED-2.
F56D2.7	ced-6	WBGene00000420	-0.0667219	5.29558	0.659497	1	ced-6 encodes an Src homology (SH) 3 and phosphotyrosine-binding (PTB) domain-containing adaptor protein, orthologous to human CED-6/GULP, that is required for cell corpse engulfment during apoptosis; CED-6 is bound by the phosphotyrosine binding motif in the cytoplasmic tail of the transmembrane protein CED-1, and and within phagocytic cells this interaction may be part of a signal transduction …
C48B4.4	ced-7	WBGene00000421	-0.114275	7.72368	0.605921	1	ced-7 encodes an ATP binding cassette (ABC) transporter that is a member of the ABCA subfamily of transporter proteins; CED-7 activity is required in both apoptotic and phagocytic cells for engulfment of apoptotic cell corpses; in regulating apoptotic cell clearance, CED-7 functions upstream of CED-10/Rac, and together with CED-1 and CED-6, to mediate actin reorganization around the apoptotic cel…
F08F1.5	ced-8	WBGene00000422	0.373	1.32331	0.342427	0.926107	The ced-8 gene encodes a homolog of the human putative membrane transporter XK; ced-8 is required for apoptosis to occur with normal speed during embryonic development.
T07C4.8	ced-9	WBGene00000423	0.169991	4.99865	0.24663	0.829086	ced-9 encodes the sole C. elegans homolog of the mammalian cell-death inhibitor Bcl-2; during development, ced-9 activity is essential for preventing cells from undergoing programmed cell death; ced-9 also appears to have proapoptotic activity; CED-9 functions by binding and repressing the activity of CED-4, a protein similar to human APAF-1 and positive regulator of CED-3 caspase activity; CED-9…
F26F4.1	cee-1	WBGene00017825	0.233033	4.58603	0.135145	0.634837
K02F3.6	ceeh-1	WBGene00019329	0.754677	4.32503	0.000570414	0.0118717	ceeh-1 encodes a soluble epoxide hydrolase (sEH) orthologous to human ABHD7 and ABHD9; recombinant CEEH-1 is biochemically active in vitro on epoxyeicosatrienoic acids and leukotoxins (EpOMEs); conversely, CEEH-1 is inhibited by urea-based antagonists of mammalian sEH that elevate EpOME levels when fed to C. elegans; perhaps because of genetic redundancy with its paralog CEEH-2, CEEH-1 has no obv…
K07C5.5	ceeh-2	WBGene00010628	0.838209	4.53084	0.00780421	0.0932099	ceeh-2 encodes a soluble epoxide hydrolase (sEH) orthologous to human ABHD7 and ABHD9; recombinant CEEH-2 is biochemically active in vitro on epoxyeicosatrienoic acids and leukotoxins (EpOMEs); conversely, CEEH-2 is inhibited by urea-based antagonists of mammalian sEH that elevate EpOME levels when fed to C. elegans; perhaps because of genetic redundancy with its paralog CEEH-1, CEEH-2 has no obv…
F16H11.4	ceh-1	WBGene00000428	-0.0333026	1.73867	0.920696	1	ceh-1 encodes a protein that contains a homeobox domain.
W03A3.1	ceh-10	WBGene00000435	-0.0667034	2.5719	0.728403	1	ceh-10 encodes a member of the Paired-like class of homeodomain proteins; the CEH-10 homeodomain is closely related to the homeodomains of two vertebrate retina proteins (Chx10 from mice and Vsx-1 from goldfish); ceh-10 is required for CAN cell fate specification and migration, complete loss of ceh-10 function results in failure of CAN cell migration and loss of expression of CEH-23 and CEH-10 it…
Y38E10A.6	ceh-100	WBGene00012584	-0.120198	5.76698	0.607572	1
F33D11.4	ceh-12	WBGene00000436	NA	NA	NA	NA	ceh-12 encodes a homeobox protein orthologous to human HLXB9 (OMIM:142994, mutated in Currarino syndrome) that is required for normal synaptic inputs to motor neurons VA2-VA10 (sisters to VB3-VB11); ceh-12 is expressed in VB motor neurons, but repressed in their VA siblings by UNC-4 and UNC-37; unc-4 or unc-37 mutants show ectopic CEH-12 expression in VA neurons, which is both necessary and suffi…
R13A5.5	ceh-13	WBGene00000437	0.263549	5.18272	0.0921787	0.509536	a homolog of Hox genes of labial/Hox1 type; affects viability, body shape and anterior patterning during embryogenesis, interacts genetically with hox genes; and is expressed in A, D, E and MS lineages in the early embryo, and in the anterior dorsal hypodermal cells, anterior body wall muscle cells, and in the cells of the prospective ventral nerve cord at the comma stage; and in the ventral nerv…
F46C8.5	ceh-14	WBGene00000438	-0.146548	2.94798	0.598044	1	ceh-14 encodes a LIM homeodomain protein orthologous to Drosophila Lim3 and the vertebrate Lhx3 and Lhx4 proteins; ceh-14 is required for specification of the AFD thermosensory neurons and for normal thermotactic behavior; a ceh-14::GFP reporter fusion is expressed in head and tail neurons, including the AFD thermosensory neurons, during late embryonic, larval, and adult stages. Animals triply mu…
C13G5.1	ceh-16	WBGene00000439	-0.0565975	2.18107	0.818617	1	ceh-16 encodes a homeodomain protein orthologous to Drosophila and vertebrate Engrailed proteins involved in segment and appendage development; ceh-16 is an essential gene required for proper specification and differentiation of the lateral seam cells during embryonic development; in specifying seam cell fates, CEH-16 appears to act as a transcriptional regulator, repressing expression of the eff…
D1007.1	ceh-17	WBGene00000440	0.359524	2.04022	0.156596	0.685184	ceh-17 encodes a phox-2-like homeodomain protein that is a member of the Q50 paired-like class of homeobox proteins and the vertebrate orthologue of Phox2a and Phox2b; that affects ALA and SIA axonal development; ceh-17 affects ALA and SIA antero-posterior axonal growth and navigation, and is expressed in five neurons of the ring ganglia (ALA and the 4 SIAs) with strongest expression in embryos a…
ZC64.3	ceh-18	WBGene00000441	0.0164911	6.66155	0.918185	1	ceh-18 encodes a POU-class homeodomain transcription factor; CEH-18 is required in hermaphrodites for specific aspects of gonadal sheath cell differentiation, such as normal cell shape and position, that are essential for negative regulation of oocyte meiotic maturation by the sheath cells; in this process, CEH-18 functions in parallel with the VAB-1/Ephrin receptor as part of a sperm-sensing che…
F20D12.6	ceh-19	WBGene00000442	-0.459166	1.50485	0.170781	0.713127	ceh-19 encodes a homeobox protein similar to Bar-like homeoproteins from Drosophila and vertebrates; it has no known function or expression pattern.
C27A12.5	ceh-2	WBGene00000429	-0.19986	2.22748	0.376426	0.95655	ceh-2 encodes a homeodomain protein homologous to Drosophila empty spiracles (EMS) and the vertebrate EMX1 and EMX2 proteins (OMIM:600034, 600035); although the exact biological role of CEH-2 in C. elegans development and/or behavior is not yet known, expression in pharyngeal neurons and muscle, as well as vulval cells (vulB1, vulB2, and vulC) at late stages of development suggests that CEH-2 may…
F31E3.1	ceh-20	WBGene00000443	0.0495807	5.94756	0.754508	1	ceh-20 encodes one of three C. elegans homeodomain proteins (CEH-20, CEH-40, and CEH-60) homologous to Extradenticle (Exd/Pbx); together with ceh-40 and unc-62, ceh-20 activity is required for embryonic viability; ceh-20 is also required as a cofactor for LIN-39- and MAB-5- dependent postembryonic mesoderm patterning; in addition, ceh-20 is required for regulating post-embryonic migrations of the…
T26C11.6	ceh-21	WBGene00000444	-0.024411	3.5924	0.918735	1	ceh-21 encodes a a ONECUT class CUT homeobox protein with a single N-terminal cut domain and an OCAM domain; the cut domain may be a compact DNA-binding domain composed of alpha helices; the OCAM domain is a nematode-specific motif conserved between CEH-21, CEH-41, and T02B5.2; ceh-21 is one of three nematode-specific ONECUT genes in a cluster with ceh-39 and ceh-41; CEH-21 may be required for mu…
F29F11.5	ceh-22	WBGene00000445	0.0637416	4.5085	0.739778	1	ceh-22 encodes an NK-2 family homeodomain factor homologous to Drosophila TINMAN and vertebrate Nkx2-5 proteins; CEH-22 activates pharyngeal muscle gene expression in combination with PHA-1 and is required for normal pharyngeal development; ceh-22 is the first gene known to be expressed in pharyngeal muscles, being exclusively active in that tissue.
ZK652.5	ceh-23	WBGene00000446	2.19861	3.05705	6.40231e-11	1.26585e-08	ceh-23 encodes a homeodomain protein required for a specific differentiated trait of the thermosensory interneuron AIY; a ceh-23::gfp promoter fusion is expressed in nine pairs of head neurons, including seven amphid sensory neurons, the BAG sensory neurons, AIY interneurons, and the CAN neurons that are in close association with the excretory canal.
F55B12.1	ceh-24	WBGene00000447	-0.127548	3.22357	0.48131	1	ceh-24 encodes an NK class homeodomain protein orthologous to human NK2 Homeobox 1 (NKX2-1; OMIM:600635) which is expressed in the thyroid, lung, and bronchial epithelia and which, when mutated, leads to disease.
F46F3.1	ceh-27	WBGene00000449	-0.0463763	4.7372	0.771096	1	ceh-27 encodes a homeodomain protein of the NK-2 class that contains Drosophila scarecrow and human NKX-2 (OMIM:606727); CEH-27 activity is essential for embryogenesis and appears to be required for maintaining hypodermal integrity during movement as embryos lacking CEH-27 burst at a breach in the ventral hypodermis upon commencement of muscle contractions; CEH-27 expression is first detected in …
K03A11.3	ceh-28	WBGene00000450	NA	NA	NA	NA	ceh-28 encodes a homeodomain protein of the NK-2 family; ceh-28 is expressed in a single pharyngeal neuron, M4; within M4, CEH-28 functions to positively regulate the expression of dbl-1, which encodes a TGF-beta, and hence, TGF-beta signaling to ensure proper morphology of the pharyngeal g1 gland cells that are located adjacent to M4.
C33D12.7	ceh-30	WBGene00000451	-0.0269083	1.99263	0.947791	1	ceh-30 encodes a homeodomain protein most similar to Drosophila and mammalian BarH1 (OMIM:605211) which function in neuronal cell fate determination; CEH-30 functions as a key regulator of sex-specific apoptosis; ceh-30 transcription is under the regulatory control of TRA-1A and UNC-86.
C33D12.1	ceh-31	WBGene00000452	0.0823957	3.55052	0.615503	1	ceh-31 encodes a protein containing a homeobox domain.
W05E10.3	ceh-32	WBGene00000453	-0.132943	6.15277	0.433572	0.983669	ceh-32 encodes a Six/sine oculis-type homeodomain protein most closely related to the Six3/6 subfamily that contains Drosophila OPTIX and human SIX3 (OMIM:603714, which when mutated leads to holoprosencephaly 2); CEH-32 appears to be essential for development and required for proper head morphogenesis; during embryogenesis, CEH-32 is expressed in hypodermal and neuronal precursors, and at later s…
C10G8.7	ceh-33	WBGene00000454	-0.138915	3.62383	0.430417	0.983365	ceh-33 encodes a Six/sine oculis class homeodomain transcription factor; preliminary RNAi experiments suggest that CEH-33 activity may be required for gonad development; a ceh-33::gfp reporter shows very weak pharyngeal expression in late embryos and early larvae.
C10G8.6	ceh-34	WBGene00000455	-0.0137231	4.94788	0.933841	1	ceh-34 encodes a homeodomain protein, homologous to human SIX2 (OMIM:604994); ceh-34 activity is required for regulation of the programmed cell death of a pharyngeal neuron, the sister of the M4 motor neuron; CEH-34 binds the egl-1 5'-regulatory region in vitro and acts together with EYA-1, with which it physically interacts, to regulate expression of egl-1 to promote programmed cell death of the…
C37E2.4	ceh-36	WBGene00000457	-0.236076	2.80317	0.316148	0.908662	ceh-36 encodes a paired-like homeodomain transcription factor that is one of three orthodenticle (OTX/OTD) homeodomain proteins in C. elegans (the others being TTX-1 and CEH-37); CEH-36 is required broadly for specification of the AWC olfactory neuron and also for establishing the left-right asymmetry of the ASEL and ASER gustatory neurons; in addition, CEH-36 is sufficient to specify the AFD the…
C37E2.5	ceh-37	WBGene00000458	0.200455	5.24939	0.194911	0.754618	ceh-37 encodes one of three C. elegans proteins with an OTX-like homeodomain; however, CEH-37 lacks other domains found in OTX proteins, and the CEH-37 homeodomain is predicted to resemble the Myb domain of telomere-binding proteins; CEH-37 binds the telomeric sequence 'TTAGGC' if it is repeated at least 1.5 times, and is mainly localized to the telomere in vivo; ceh-37 mutants have a weak increa…
F22D3.1	ceh-38	WBGene00000459	0.0865183	6.72708	0.624264	1	ceh-38 encodes two proteins, by alternative splicing, that belong to the ONECUT class of homeodomain proteins (which includes mammalian hepatocyte nuclear factor-6); ceh-38 is expressed from embryos to adults, and in many different tissues (e.g., pharynx, gut, hypodermis and many nerve cells).
T26C11.7	ceh-39	WBGene00000460	-0.174205	4.2291	0.305806	0.89821	ceh-39 encodes a a ONECUT class CUT homeobox protein with a single N-terminal cut domain; CEH-39 acts as an X-signal element (XSE) to affect sex determination; the cut domain may be a compact DNA-binding domain composed of alpha helices; ceh-39 is one of three nematode-specific ONECUT genes in a cluster with ceh-21 and ceh-41.
F17A2.5	ceh-40	WBGene00000461	0.324712	1.17206	0.329159	0.914819	ceh-40 encodes one of three C. elegans homeodomain proteins (CEH-20, CEH-40, and CEH-60) homologous to Extradenticle (Exd/Pbx); ceh-40 genetically interacts with ceh-20 and unc-62 during embryonic development: while loss of ceh-40 activity alone results in no significant embryonic lethality, loss of ceh-40 and ceh-20, or ceh-40, ceh-20, and unc-62, results in incompletely penetrant embryonic leth…
T26C11.5	ceh-41	WBGene00000462	-0.132114	4.56329	0.459501	0.99384	ceh-41 encodes a a ONECUT class CUT homeobox protein with a single N-terminal OCAM domain; the OCAM domain is a nematode-specific motif conserved between CEH-21, CEH-41, and T02B5.2; ceh-41 is one of three nematode-specific ONECUT genes in a cluster with ceh-21 and ceh-39; ceh-41 has no obvious function in mass RNAi assays.
C28A5.4	ceh-43	WBGene00000463	-0.00693747	4.21624	0.975444	1	ceh-43 encodes a homeobox protein of the Distal-less (Dll) class that is required for development of the anterior hypodermis during embryonic morphogenesis for cell adhesion; ceh-43 affects embryonic and larval viability; it is predominantly expressed in the head hypdodermis, neuronal support cells and CAN neurons.
Y54F10AM.4	ceh-44	WBGene00000464	-0.0173063	6.58057	0.910384	1	ceh-44 encodes at least three proteins via alternative splicing; the CEH-44A protein is an ortholog of the CUX class of CUT homeodomain proteins, expressed in early embryos (mostly anterior in the comma stage), in the larval nerve ring and the adult gonad; the CUX class includes Drosophila CUT, human CUTL1 and human CUTL2; ceh-44 is a complex gene, in which two alternatively spliced protein produ…
ZK993.1	ceh-45	WBGene00022837	-0.250822	2.7056	0.29714	0.889708	ceh-45 encodes a homeodomain-containing protein; loss of ceh-45 activity via large-scale RNAi results in variable embryonic lethality.
C17H12.9	ceh-48	WBGene00015934	-0.214106	4.577	0.277969	0.865718	ceh-48 encodes a ONECUT class CUT homeobox protein with a single N-terminal cut domain; the cut domain may be a compact DNA-binding domain composed of alpha helices; CEH-48 is strongly affiliated with, and may be orthologous to, Drosophila ONECUT and mammalian HNF6 proteins; ceh-48 has no obvious function in mass RNAi assays.
F17A9.6	ceh-49	WBGene00017538	1.26203	0.957147	0.0251053	0.22022	ceh-49 encodes a divergent ONECUT class CUT homeobox protein with a single N-terminal cut domain; CEH-49 has an atypical tyrosine residue at position 48 of its homeodomain rather than a phenylalanine or tryptophan residue; the cut domain may be a compact DNA-binding domain composed of alpha helices; phylogenetically, CEH-49 is (somewhat distantly) affiliated with CEH-48, Drosophila ONECUT, and ma…
C16C2.1	ceh-5	WBGene00000430	0.81924	-0.251307	0.131728	0.626114	ceh-5 encodes a homeodomain protein, similar to the human VENTRAL ANTERIOR HOMEO BOX 2 gene (VAX2; OMIM:604295); CEH-5 is dispensable for viability and gross morphology.
Y80D3A.3	ceh-51	WBGene00013583	0.768985	0.722109	0.137953	0.639979	ceh-51 encodes a homeodomain transcription factor most closely related to those of NK-2 subfamily proteins containing multiple serine residues in the N-terminus; ceh-51 is expressed in the early MS lineage downstream of TBX-35; TBX-35 directly activates ceh-51 and TBX-35 is sufficient, but not necessary, for ceh-51 activation; activation of ceh-51 in a tbx-35 mutant background is POP-1-dependent;…
C09G12.1	ceh-53	WBGene00015651	-0.217092	1.54118	0.473459	0.99683	ceh-53 encodes a paired-like homeodomain protein of the K50 class, which has no obvious function in mass RNAi assays.
T13C5.4	ceh-54	WBGene00020485	-0.513813	0.529251	0.19734	0.758294	T13C5.4 encodes a paired-like homeodomain protein of the Q50 class, which has no obvious function in mass RNAi assays.
C07E3.5	ceh-57	WBGene00007416	0.215358	2.57584	0.434491	0.983669
C07E3.6	ceh-58	WBGene00007417	0.0261003	4.01208	0.869023	1
K02B12.1	ceh-6	WBGene00000431	-0.0555378	4.26697	0.70109	1	ceh-6 encodes a POU family homeodomain protein, homologous to human POU3F4 (OMIM:304400, mutated in conductive deafness 3); ceh-6 is required for embryonic viability, locomotion, and molting, and for regulation of ectodermal and excretory function; ceh-6 activity is also required for transdifferentiation of the Y rectal cell to the PDA neuron during larval development; CEH-6 is expressed dynamica…
F22A3.5	ceh-60	WBGene00017690	-0.614709	0.626004	0.0965459	0.524444	ceh-60 encodes one of three C. elegans homeodomain proteins (CEH-20, CEH-40, and CEH-60) homologous to Extradenticle (Exd/Pbx); loss of ceh-60 activity via large-scale RNAi results in reduced fat content, sterility, and variable embryonic lethality.
R06F6.6	ceh-62	WBGene00011069	-0.212385	4.88924	0.24715	0.829522
C02F12.10	ceh-63	WBGene00045215	-0.0551595	1.03702	0.886243	1	C02F12.10 encodes a homeobox protein of uncertain affinity, but with some similarity to vertebrate Hox3 proteins and the D. melanogster homeobox protein ROUGH; C02F12.10 is expressed in a single tail neuron of hermaphrodites from late embryo to adult stages, as well as in a uterus cell separate from the vulva (perhaps in the spermetheca); C02F12.10 has no obvious function in mass RNAi assays.
C34C6.8	ceh-7	WBGene00000432	NA	NA	NA	NA	ceh-7 encodes a homeodomain transcription factor; expressed in cells around the rectum of the male tail.
ZC376.4	ceh-74	WBGene00013876	0.22264	2.91553	0.328164	0.914598
C50H2.6	ceh-75	WBGene00008242	NA	NA	NA	NA
Y97E10AM.1	ceh-76	WBGene00022395	NA	NA	NA	NA
C26E1.3	ceh-79	WBGene00007749	-0.595242	4.99783	0.000116221	0.00311349
ZK265.4	ceh-8	WBGene00000433	0.20211	2.26487	0.368111	0.950714	ceh-8 encodes a paired-like homeodomain protein of the Q50 class orthologous to the Rx homeobox protein of humans (RAX; OMIM:601881) and Drosophila (CG10052-PA); CEH-8 and RX belong to one of at least 18 distinct families of paired-like homeodomain proteins, including 12 families in the Q50 class.
F45C12.3	ceh-81	WBGene00018434	0.0576893	0.569914	0.951791	1
F45C12.2	ceh-82	WBGene00018433	0.331244	0.0492216	0.70757	1
F45C12.15	ceh-83	WBGene00018446	0.401318	1.86598	0.230021	0.808673
C40D2.4	ceh-84	WBGene00016557	NA	NA	NA	NA
F42G2.6	ceh-86	WBGene00018355	0.0542251	3.42727	0.865712	1	ceh-86 encodes a homeodomain-containing protein; ceh-86(RNAi) performed in the background of C. elegans retinoblastoma pathway mutants results in a number of phenotypes that suggest ceh-86 plays a role in the normal development and/or survival of the animal; a ceh-86::gfp promoter fusion is expressed in the adult intestine.
F34D6.2	ceh-87	WBGene00018022	NA	NA	NA	NA
C49C3.5	ceh-88	WBGene00008195	-0.1217	4.60773	0.460644	0.993932
F28H6.2	ceh-89	WBGene00009231	-0.245008	2.77585	0.212301	0.78189
Y65B4BR.9	ceh-9	WBGene00000434	0.234132	1.02653	0.473397	0.99683	ceh-9 encodes a homeodomain-containing protein that is related to members of the NK family of homeodomain transcription factors; as a mutation in ceh-9 results in no obvious defects, the precise role of ceh-9 in C. elegans development and/or behavior is not yet known.
R03E1.4	ceh-90	WBGene00010995	NA	NA	NA	NA
Y66A7A.5	ceh-91	WBGene00013425	-0.190831	4.07245	0.213162	0.783001	ceh-91 encodes a protein with a THAP or THAP-like domain that is required for fertility, normal body thickness, vulval morphogenesis, and general health; ceh-91 is expressed in intestine, renal gland cells, and head neurons; other proteins with THAP or THAP-like domains include LIN-15A, LIN-15B, LIN-36, and HIM-17 (which all interact with LIN-35/Rb), as well as CDC-14B, CTB-1, GON-14, and ~100 ot…
Y66D12A.5	ceh-92	WBGene00013431	-0.00486642	2.84089	0.988511	1
R04A9.5	ceh-93	WBGene00019864	-0.0303689	3.45155	0.89959	1
T21B4.17	ceh-99	WBGene00044032	0.0052979	1.14704	1	1
C03D6.3	cel-1	WBGene00000466	0.013354	5.22388	0.943121	1	cel-1 encodes a mRNA capping enzyme, with a N-terminal region with RNA triphosphatase activity and a C-terminal region containing motifs found in yeast and vaccinia virus capping enzyme guanylytransferases; cel-1 is required for embryonic viability, body morphology, and vulval development.
F52B5.5	cep-1	WBGene00000467	0.0416262	3.34066	0.815626	1	cep-1 encodes an ortholog of the human tumor suppressor p53 (OMIM:191170, mutated in Li-Fraumeni syndrome) that promotes DNA damage-induced apoptosis and is required for normal meiotic segregation in the germ line, and affects sensitivity to hypoxia-induced lethality and longevity in response to starvation; CEP-1 is expressed ubiquitously in embryos and in the nucleoli of a subset of pharyngeal c…
F22E10.5	cept-1	WBGene00009057	1.10099	6.32888	4.45034e-06	0.000197443
Y49A3A.1	cept-2	WBGene00013024	-0.164949	4.66579	0.377976	0.95655	Y49A3A.1 encodes a homolog of choline/ethanolaminephosphotransferase choline phosphotransferase 1; Y49A3A.1 shares an operon with vha-13, and thus might be a previously undescribed V-ATPase component or ancillary protein.
F43G9.11	ces-1	WBGene00000468	0.565886	-0.0963063	0.416437	0.975402	ces-1 encodes a C2H2-type zinc finger transcription factor that is a member of the Snail family of proteins that includes Drosophila Scratch, Snail, and Slug, and human SNAIL and SLUG; during development, CES-1 functions as a transcriptional repressor that blocks programmed cell death in specific neurons by inhibiting expression of the cell-death activator EGL-1; in addition, CES-1 functions to r…
ZK909.4	ces-2	WBGene00000469	1.10033	2.6472	0.00237882	0.0371062	ces-2 encodes a basic region leucine-zipper (bZIP) transcription factor, most similar in sequence and binding specificity to the PAR (proline- and acid-rich) subfamily of bZIP proteins; ces-2 is required to activate programmed cell death in the sister cells of the serotoninergic neurosecretory motor (NSM) neurons, and is transcriptionally inhibited by activated LET-60(G12V); in regulating program…
F56D1.6	cex-1	WBGene00023407	-0.0476717	4.02089	0.883622	1
T09A5.1	cex-2	WBGene00023408	-0.320437	6.44476	0.182302	0.734383
F33A8.3	cey-1	WBGene00000472	-0.102025	9.30777	0.575721	1	cey-1 encodes a protein with a cold-shock/Y-box domain that is expressed in early embryonic blastomeres (at the 15-cell stage, i.e., pre-gastrulation), but is normally repressed in early germline blastomeres by PIE-1.
F46F11.2	cey-2	WBGene00000473	1.34594	3.6141	1.13078e-10	2.12051e-08	cey-2 encodes a cold-shock/Y-box domain-containing protein; by homology, CEY-2 is predicted to function as either an RNA-binding protein involved in translation or RNA processing, or a DNA-binding protein involved in transcriptional regulation; cey-2 mRNA is expressed maternally in the early embryo, in a pattern characteristic of class II maternal RNAs, which are initially detected throughout the…
M01E11.5	cey-3	WBGene00000474	0.902488	3.35514	1.04468e-05	0.000412209	cey-3 encodes a protein with a cold-shock/Y-box domain; CEY-3 associates with CGH-1, CEY-2, and CEY-4 in cytoplasmic particles of the gonad and early embryo.
Y39A1C.3	cey-4	WBGene00000475	0.00858313	7.52016	0.96243	1	cey-4 encodes a Y box-containing protein with no known function in vivo; CEY-4 associates with CGH-1 and CEY-2/3 in cytoplasmic particles of the gonad and early embryo.
T23D8.8	cfi-1	WBGene00000476	-0.00622435	4.86802	0.982032	1	cfi-1 encodes a DNA-binding protein containing an AT-rich interaction domain (ARID) that affects differentiation of the URA sensory neurons, AVD, and PVC interneurons; acts downstream of UNC-86 and LIN-32 in controlling URA and IL2 cell fate, and is expressed in some neurons and muscle cells.
F43G9.5	cfim-1	WBGene00009668	0.112827	4.53933	0.521468	1	F43G9.5 encodes a NUDIX hydrolase that that inhibits DHC-1 in vivo, and is a (perhaps evolutionarily conserved) target of transcriptional activation by DAF-16; F43G9.5(RNAi) suppresses the lethality of conditional dhc-1 mutations, as well as the spindle length and cytokinesis defects of dhc-1(or195), indicating that F43G9.5 negatively regulates dynein; while loss of F43G9.5 function has no obviou…
D1046.1	cfim-2	WBGene00008362	-0.164973	5.36281	0.412713	0.974034	D1046.1 encodes a putative cleavage and polyadenylation specificity factor, orthologous to human CPSF6 (OMIM:604979) and CPSF7, that is required for normal locomotion and fertility; D1046.1 is expressed in many, if not all, somatic tissues of larvae and adults; D1046.1(RNAi) has no obvious synthetic phenotype in dual RNAi assays with W04D2.6 (an ortholog of the splicing protein RED120).
F52B11.1	cfp-1	WBGene00009924	-0.166508	6.1208	0.396373	0.964335
C18C4.2	cft-1	WBGene00000477	0.184498	4.10536	0.276538	0.864188
F27E11.3	cfz-2	WBGene00000478	0.113081	5.43374	0.42697	0.980241	cfz-2 encodes one of four C. elegans Frizzled homologs, integral membrane proteins that contain an external cysteine-rich domain (CRD) and seven transmembrane domains and that function in a wide variety of species as receptors for Wnt glycoprotein signaling molecules; CFZ-2 activity is required for cell migration and for vulval development.
C14A11.3	cgef-1	WBGene00006496	0.0362914	5.12503	0.79769	1	cgef-1 encodes a putative guanine nucleotide exchange factor (GEF) and positively regulates CDC-42 during asymmetric division in the embryo; cgef-1 also affects the localization of PAR proteins in the embryo; since cgef-1 mutants exhibit mild phenotypes, cgef-1 may function redundantly with other GEFs to regulate CDC-42 function; CGEF-1 expressed under germline regulatory control is enriched in t…
C07H6.5	cgh-1	WBGene00000479	0.239918	6.34342	0.122869	0.603213	cgh-1 encodes a putative DEAD-box RNA helicase, orthologous to budding yeast Dhh1p, fission yeast Ste13p, Drosophila ME31B, and human DDX6 (OMIM:600326); CGH-1 inhibits physiological apoptosis in oocytes, keeping it down to a normal level of ~50% in hermaphrodite gonads; independently of apoptosis, CGH-1 is also required for sperm function, oocyte fertilization, and early embryonic cytokinesis; b…
Y38C9A.2	cgp-1	WBGene00000480	0.13653	6.00781	0.435259	0.984035
T27A10.7	cgr-1	WBGene00020847	-0.472503	5.07006	0.0154776	0.155288
T06C12.10	cgt-1	WBGene00011517	0.716866	5.76791	0.00116681	0.0209726	cgt-1 encodes a transmembrane protein that is one of three C. elegans ceramide glucosyltransferases; by homology, CGT-1 is predicted to localize to the Golgi membrane and catalyze the transfer of glucose from UDP-glucose to ceramide to synthesize glucosylceramide, a glycosphingolipid precursor; although cgt-1 mutant worms show no obvious defects, animals doubly mutant for cgt-1 and cgt-3 arrest d…
F20B4.6	cgt-2	WBGene00017625	0.295376	3.07138	0.149131	0.669141	cgt-2 encodes a transmembrane protein that is one of three C. elegans ceramide glucosyltransferases; by homology, CGT-2 is predicted to localize to the Golgi membrane and catalyze the transfer of glucose from UDP-glucose to ceramide to synthesize glucosylceramide, a glycosphingolipid precursor; although cgt-2 mutant worms show no obvious defects, cgt-3;cgt-1;cgt-2 triply mutant animals show reduc…
F59G1.1	cgt-3	WBGene00019127	0.354495	7.7327	0.0572546	0.381767	cgt-3 encodes a transmembrane protein that is one of three C. elegans ceramide glucosyltransferases; by homology, CGT-3 is predicted to localize to the Golgi membrane and catalyze the transfer of glucose from UDP-glucose to ceramide to synthesize glucosylceramide, a glycosphingolipid precursor; although cgt-3 mutant worms show no obvious defects, animals doubly mutant for cgt-3 and cgt-1 arrest d…
T06D10.2	chaf-1	WBGene00011532	0.857957	4.41466	2.51082e-06	0.000121145
Y71G12B.1	chaf-2	WBGene00022141	0.492434	3.75242	0.0148403	0.150471
R08C7.2	chat-1	WBGene00019946	-0.268824	7.56196	0.0572278	0.381767
T20G5.1	chc-1	WBGene00011867	-0.0714071	8.71653	0.693512	1	chc-1 encodes the C. elegans clathrin heavy chain ortholog; loss of chc-1 activity via RNAi results in defects in receptor-mediated yolk endocytosis and thus, embryonic lethality.
M176.3	chch-3	WBGene00010942	0.000831752	6.40558	0.997843	1
H06O01.2	chd-1	WBGene00010369	-0.0707084	6.43156	0.762272	1	H06O01.2 encodes a large (1,461-aa) putative chromodomain helicase DNA-binding protein that inhibits DHC-1 in vivo; H06O01.2 is orthologous to budding yeast CHD1, human CHD1 (OMIM:602118), and human CHD2 (OMIM:602119); H06O01.2(RNAi) suppresses the lethality of conditional dhc-1 mutations, as well as the spindle length and cytokinesis defects of dhc-1(or195), indicating that H06O01.2 negatively r…
T14G8.1	chd-3	WBGene00000482	-0.0606762	6.78286	0.758361	1	chd-3 encodes a PHD-finger SNF2 family member containing a chromo domain and a C-terminal helicase domain that affects Notch-dependent vulval development; expressed in virtually all embryonic cells and in many larval nuclei.
T04D1.4	chd-7	WBGene00007053	0.0698813	8.24585	0.725374	1
C10G11.7	chdp-1	WBGene00015687	0.279387	7.64889	0.110855	0.568816
C55B7.12	che-1	WBGene00000483	0.156005	-0.28242	0.807091	1	che-1 encodes a C2H2-type zinc finger-containing transcription factor orthologous to Drosophila GLASS, which is required for photoreceptor cell differentiation; CHE-1 is required for determining the identity and function of the amphid ASE neurons, the major neurons that mediate chemotaxis to water-soluble attractants; CHE-1 is expressed predominantly in the ASE neurons and regulates, either direc…
F35D11.11	che-10	WBGene00018051	-0.886837	7.00314	1.06001e-05	0.000416448	che-10 encodes, by alternative splicing, at least four isoforms of a rootletin ortholog required for ciliogenesis; che-10(ks69) mutants have strong but not absolute defects in cilium initiation, forming 1-2 short cilia per amphid channel and showing intraflagellar transport (IFT) along these vestigial cilia; che-10(ks69) mutants have no remaining cilia in their phasmid channels, and abnormal IFT …
C27A7.4	che-11	WBGene00000490	-0.200376	4.86944	0.348926	0.93226	che-11 encodes a large, unfamiliar protein with orthologs in vertebrates and arthropods (e.g., KIAA0590 and CG11838-PA) and in Chlamydomonas (IFT140), as well as distant similarity to OSM-1 and ZK520.1; che-11 is required for normal synthesis of sensory cilia (via intraflagellar transport) in sensory neurons, osmotic avoidance, and dauer formation.
B0024.8	che-12	WBGene00000491	-0.123852	4.47786	0.551608	1	che-12 encodes a conserved protein that contains at least seven predicted HEAT repeats; CHE-12 activity is required continuously in sensory neurons for formation of distal ciliary segments and thus, for normal sensory cilium morphology and function and chemotaxis to a subset of attractants, including sodium chloride; a che-12::gfp promoter fusion is expressed in the two phasmid neurons and the su…
F59C6.7	che-13	WBGene00000492	-0.0705162	3.03373	0.732659	1	che-13 encodes a novel protein homologous to mammalian IFT57/Hippi; CHE-13 is a proposed component of the intraflagellar transport (IFT) complex B, and is required for the construction and maintenance of cilia on a subset of sensory neurons; in addition, CHE-13 is required for proper localization of OSM-5, a murine polaris homolog, to IFT complex B; CHE-13 is expressed in ciliated sensory neurons…
F56H1.1	che-14	WBGene00000493	-0.0714209	2.02545	0.837503	1	che-14 encodes a protein with a sterol-sensing domain that is similar to the Drosophila and mammalian proteins Dispatched; CHE-14 protein is involved in the exocytotic secretion of lipid-modified proteins at the apical surface of certain epithelial cells.
F38G1.1	che-2	WBGene00000484	0.241969	3.39478	0.376617	0.95655	che-2 encodes a protein that contains G-protein beta-like WD-40 repeats that affects chemotaxis, dauer formation, and longevity; expressed in the cilia of most ciliated sensory neurons, some head neurons, and male tail rays.
F18C12.1	che-3	WBGene00000485	-0.0985596	5.84576	0.651822	1	che-3 encodes a dynein heavy chain (DHC) 1b isoform that affects the establishment and maintainance of the structural integrity of sensory cilia, and that also has a role in intraflagellar transport; CHE-3 is expressed in ciliated sensory neurons.
C23H5.7	che-6	WBGene00000487	0.216766	2.35121	0.536954	1
F26D11.10	che-7	WBGene00000488	-0.117211	4.31232	0.479447	0.99918
T22C8.2	chhy-1	WBGene00011923	-0.341036	3.20007	0.0757978	0.453093	chhy-1 encodes a chondroitin hydrolase orthologous to human HYAL1 (OMIM:607071, mutated in mucopolysaccharidosis type IX) and other hyaluronidases; in COS-7 cells, heterologously expressed CHHY-1 preferentially cleaves chondroitin as an endo-ss-galactosaminidase, with lesser activity on chondroitin sulfate A (CS-A) and CS-C, but almost no activity on hyaluronic acid; the optimum pH for CHHY-1 cle…
C08H9.4	chil-1	WBGene00007465	-0.615194	2.17111	0.0445125	0.325877
C44C1.2	chil-10	WBGene00016642	0.0190587	4.35946	0.896704	1
C45E5.2	chil-11	WBGene00016665	-0.701635	0.67985	0.0733771	0.444318
M01B2.6	chil-12	WBGene00010799	-0.284042	2.88508	0.132012	0.627199
M176.8	chil-13	WBGene00010945	-0.764755	5.25939	0.000995925	0.0183545
R09B5.12	chil-14	WBGene00019980	-0.0362175	1.5961	0.937506	1
R09D1.1	chil-15	WBGene00011157	NA	NA	NA	NA
R09D1.2	chil-16	WBGene00011158	-1.63865	3.59313	3.90911e-07	2.39417e-05
R09D1.3	chil-17	WBGene00011159	NA	NA	NA	NA
R09D1.5	chil-18	WBGene00011161	0.516588	1.78807	0.320415	0.910129
R09D1.6	chil-19	WBGene00011162	-0.244411	0.574092	0.60753	1
C08H9.6	chil-2	WBGene00007466	-0.369273	0.388368	0.381191	0.95655
R09D1.7	chil-20	WBGene00011163	0.339578	-0.312037	0.672074	1
R09D1.8	chil-21	WBGene00011164	0.126454	0.474957	0.815778	1
R09D1.10	chil-22	WBGene00011166	-0.828543	3.61768	0.00544693	0.0711779
R09D1.11	chil-23	WBGene00011167	-2.11135	2.06234	8.44586e-12	1.94469e-09
T10D4.3	chil-24	WBGene00020407	-0.411462	4.00187	0.0129233	0.136196
T19H5.1	chil-25	WBGene00011846	-0.183862	0.632345	0.711945	1
T19H5.2	chil-26	WBGene00011847	-0.821327	-0.00496407	0.162116	0.695821
T19H5.3	chil-27	WBGene00011848	0.231161	-0.509232	0.807424	1
F15A4.8	chil-28	WBGene00008842	-3.44361	5.23109	5.95498e-15	2.70803e-12
C08H9.7	chil-3	WBGene00007467	-0.608352	2.14255	0.0135145	0.140715
C08H9.10	chil-4	WBGene00007469	-0.00794118	0.805953	1	1
C08H9.11	chil-5	WBGene00007470	-0.147746	0.913001	0.673338	1
C08H9.12	chil-6	WBGene00007471	-0.380767	0.840821	0.327521	0.914433
C08H9.13	chil-7	WBGene00007472	-0.831185	0.111316	0.0933191	0.513129
C08H9.14	chil-8	WBGene00007473	-0.655821	-0.0113713	0.376526	0.95655
ZK938.6	chil-9	WBGene00014162	NA	NA	NA	NA
BE0003N10.2	chin-1	WBGene00015267	0.0379929	4.09369	0.792736	1	chin-1 encodes a putative GTPase activating protein (GAP) and is orthologous to vertebrate chimaerins; chin-1 negatively regulates CDC-42 during asymmetric division in the embryo; chin-1 restricts both the spatial extent of CDC-42 expression and the recruitment of NMY-2 during the phase in which polarity is maintained by CDC-42; chin-1 is also required for viability and normal gonad morphology; C…
Y39H10A.7	chk-1	WBGene00000498	0.353094	3.71646	0.085257	0.485543	chk-1 encodes a CHK1-like serine threonin protein kinase that affects fertility.
Y60A3A.12	chk-2	WBGene00000499	0.218909	1.8572	0.433808	0.983669	chk-2 encodes a member of the Cds1/Chk2 checkpoint kinase family, orthologous to human CHK2 (OMIM:604373, mutated in Li-Fraumeni syndrome), that affects pairing between homologous chromosomes during early meiotic prophase, and might function to couple premeiotic S phase with early prophase; CHK-2 is expressed in the germ line.
M03C11.2	chl-1	WBGene00010839	0.121129	3.00981	0.634651	1
T09B4.10	chn-1	WBGene00000500	0.0526282	5.08937	0.718725	1	chn-1 encodes an ortholog of mammalian carboxyl-terminus of Hsc70 interacting protein (CHIP), an E4 ubiquitin-chain elongation factor; chn-1 is ubiquitously expressed; chn-1(by155) mutants are viable and superficially normal, but have reduced fertility and arrest as larvae if subjected to heat shock; chn-1 overexpression causes either embryonic lethality (if strong) or defective egg-laying and lo…
C48D1.3	cho-1	WBGene00000501	0.0667707	5.71653	0.694844	1	cho-1 encodes a high-affinity choline transporter orthologous to members of the sodium-dependent glucose transporter family; CHO-1 is expressed in cholinergic neurons.
Y110A7A.13	chp-1	WBGene00000502	0.370394	5.31266	0.0160471	0.15942	chp-1 encodes a protein containing two CHORD domains that is required for embryonic polarity, germline development, and vulval development.
ZK856.8	chpf-1	WBGene00014109	-0.0470134	5.89405	0.802037	1
F59D6.7	chpf-2	WBGene00019108	-0.0923379	3.83059	0.670656	1
T25G3.2	chs-1	WBGene00000496	0.138639	2.8686	0.615327	1	chs-1 encodes a chitin synthase, paralogous to CHS-2; chs-1 is required for embryonic chitin synthesis, eggshell synthesis and osmotic integrity, error-free chromosomal segregation during meiosis, polar body extrusion, association of the sperm pronucleus/centrosome complex (SPCC) with the early embryonic cortex, localization of PAR-2 in early embryos, posterior localization of P granules or PIE-1…
F48A11.1	chs-2	WBGene00000497	0.214514	3.67252	0.589592	1	chs-2 encodes a putative chitin synthase, paralogous to CHS-1; CHS-2 is required for synthesis of chitin lining the inner pharyngeal surface (primarily in the buccal cavity and grinder), while CHS-1 is dispensable for pharyngeal chitin; CHS-2 is also required for normal pharyngeal shape and function, and for larval viability; chs-2(RNAi) animals have abnormally large, misshapen grinders, and arre…
C04F6.3	cht-1	WBGene00000503	-1.65295	8.76308	2.39289e-10	3.99327e-08	cht-1 encodes a chitinase orthologous to human chitinase-1 (OMIM:600031, mutations are associated with chitotriosidase deficiency); CHT-1 is predicted to function as an extracellular O-glycosyl hydrolase that hydrolyzes the glycosidic bond between two or more carbohydrates; in C. elegans, CHT-1 may play a role in embryogenesis, and may also be required for cuticle degradation during molting and d…
T13H5.3	cht-2	WBGene00011757	0.133623	0.7906	0.789988	1
C25A8.4	cht-3	WBGene00016084	0.0673741	1.32909	0.91342	1
Y22D7AL.14	cht-4	WBGene00021252	0.29353	1.03433	0.564573	1
F35C8.7	chtl-1	WBGene00018037	0.314397	3.93981	0.0614117	0.400337
ZK721.1	chup-1	WBGene00006477	-0.396785	3.85391	0.0250483	0.219898	chup-1 encodes a transmembrane protein related to mammalian proteins SIDt1 and SIDt2; CHUP-1 activity is required for cholesterol import and thus for a number of biological processes including oogenesis, embryonic, larval, and dauer development, growth, stress resistance, and locomotion; chup-1 expression is seen at all developmental stages; a chup-1 reporter fusion is strongly expressed in the i…
F22E12.2	chw-1	WBGene00009059	0.171758	3.2521	0.430914	0.983365	chw-1 encodes a member of the Rho subfamily of Ras small GTP-binding proteins that is related to the human RhoU and RhoV atypical Rho GTPases.
H14E04.5	cic-1	WBGene00000506	0.136026	3.96005	0.40935	0.97398
K10D2.3	cid-1	WBGene00019629	0.022061	5.52027	0.88913	1	cid-1 (also known as pup-1) encodes a template-independent poly(U) polymerase with 3'' end RNA substrates, orthologous to human ZCCHC6 and ZCCHC11, and paralogous to PUP-2; CID-1 prevents larvae from growing to adulthood in media containing hydroxyurea (HU, a drug that stalls replication forks) and represses HSP-4 expression; CID-1 is required for gonadogenesis, embryonic and vulval development, …
C02F5.4	cids-1	WBGene00015347	0.194642	4.12007	0.233678	0.81485	cids-1 encodes a protein that contains a CTD (C-terminal domain of RNA Pol II)-interacting domain and that is orthologous to Saccharomyces cerevisiae RTT103; cids-1 was identified genetically as a suppressor of the SynMuv phenotype produced by lin-15AB(n765), a mutation that results in transposition of the 3'-end cleavage and polyadenylation signal of another gene into the third exon of lin-15B; …
F36A2.1	cids-2	WBGene00009451	0.00552811	5.60582	0.970398	1	cids-2 encodes a protein that contains a CTD (C-terminal domain of RNA Pol II)-interacting domain and that is paralogous to CIDS-1; cids-2 was identified genetically as a suppressor of the SynMuv phenotype produced by lin-15AB(n765), a mutation that results in transposition of the 3'-end cleavage and polyadenylation signal of another gene into the third exon of lin-15B; qRT-PCR assays suggest tha…
K08F11.3	cif-1	WBGene00019543	0.014915	6.84363	0.931717	1
C50C3.7	cil-1	WBGene00086546	-0.323857	4.35329	0.133656	0.630341
F45E4.11	cima-1	WBGene00018473	0.636748	4.27563	0.000382633	0.00859271	cima-1 encodes a membrane solute transporter that is a member of the SLC17 family of transporters; CIMA-1 functions postembryonially in epidermal cells to maintain synaptic contacts established during embryogenesis; specifically, CIMA-1 negatively regulates levels of the EGL-15(5A)/FGF receptor isoform to correctly position glia and control epidermal-glia cell adhesion; cima-1 expression begins d…
ZK1127.7	cin-4	WBGene00022854	-0.0359592	3.02562	0.8849	1
F55F8.4	cir-1	WBGene00018892	0.0790565	5.66956	0.705865	1	cir-1 is a nuclear protein homologous to mammalian CIR, a component of the co-repressor complex which associates with CBF1 in mammals (OMIM:605228); cir-1 is required for larval and different aspects of germ line development from proliferation and gonad extension, to progression of meiosis; cir-1 mutants cause 90% of larvae to cease development at larval stage1, escapers are lethargic and show de…
W02B12.15	cisd-1	WBGene00044026	0.251218	5.8899	0.2656	0.850445
M88.7	cisd-3.1	WBGene00010909	-0.0481962	4.94381	0.796426	1
Y67D2.3	cisd-3.2	WBGene00022053	-0.106512	6.32862	0.620291	1
F44B9.4	cit-1.1	WBGene00000507	-0.0671323	4.71572	0.689886	1	cit-1.1 encodes one of two C. elegans cyclin T orthologs; RNAi experiments indicate that CIT-1.1 functions redundantly with CIT-1.2 to broadly regulate embryonic transcription; by homology, CIT-1.1 and CIT-1.2 are predicted to interact with the CDK-9 kinase to form the P-TEFb transcription elongation factor that in C. elegans is required for Ser2, but not Ser5, phosphorylation in the C-terminal d…
F44B9.3	cit-1.2	WBGene00000508	0.114693	5.94223	0.508679	1	cit-1.2 encodes one of two C. elegans cyclin T orthologs; RNAi experiments indicate that CIT-1.2 functions redundantly with CIT-1.1 to broadly regulate embryonic transcription; by homology, CIT-1.1 and CIT-1.2 are predicted to interact with the CDK-9 kinase to form the P-TEFb transcription elongation factor that in C. elegans is required for Ser2, but not Ser5, phosphorylation in the C-terminal d…
C28D4.2	cka-1	WBGene00000509	0.221616	6.27249	0.169395	0.710012	cka-1 encodes an isoform of choline kinase whose activity has been verified in vitro, and that has a strong preference for choline over ethanolamine; CKA-1 and CKA-2 comprise a related group ('A') of choline kinases.
C52B9.1	cka-2	WBGene00000510	-0.0227108	5.08487	0.894337	1	cka-2 encodes an isoform of choline kinase whose activity has been verified in vitro; CKA-1 and CKA-2 comprise a related group ('A') of choline kinases; purified CKA-2 is dimeric, requires 1 mM Mg(2+) for optimal activity, and has a strong preference for choline over ethanolamine; CKA-2 has a pH optimum of 10 and a k(cat) of 74/s, close to the maximum rate observed for yeast and rat enzymes.
B0285.8	ckb-1	WBGene00000511	-0.227211	3.67978	0.226659	0.803064	ckb-1 encodes a putative choline kinase; CKB-1 through CKB-4 comprise a related group ('B') of choline kinases.
B0285.9	ckb-2	WBGene00000512	0.955692	3.65847	0.00126266	0.0222975	ckb-2 encodes an isoform of choline kinase whose activity has been verified in vitro; CKB-1 through CKB-4 comprise a related group ('B') of choline kinases; purified CKB-2 has a strong preference for choline over ethanolamine, a specific activity of 2.4 micromol/min/mg protein and a pH optimum near 10.
B0285.10	ckb-3	WBGene00000513	0.166688	1.30773	0.659005	1	ckb-3 encodes a putative choline kinase; CKB-1 through CKB-4 comprise a related group ('B') of choline kinases.
F22F7.5	ckb-4	WBGene00000514	0.134407	4.07138	0.433567	0.983669	ckb-4 encodes an isoform of choline kinase whose activity has been verified in vitro, and that has a strong preference for choline over ethanolamine; CKB-1 through CKB-4 comprise a related group ('B') of choline kinases.
T27A10.3	ckc-1	WBGene00000515	-0.283443	3.71638	0.110403	0.566975	ckc-1 encodes a putative ethanolamine or choline kinase, with somewhat more sequence similarity to ethanolamine kinases; CKC-1 is the sole member of a 'C' group of choline/ethanolamine kinases.
T05A6.1	cki-1	WBGene00000516	-0.0841521	5.43625	0.662722	1	cki-1 encodes a homolog of the mammalian cyclin-dependent kinase inhibitor p27/KIP1 that is required for the arrest of cell division in larval blast lineages, dauer larvae and starved L1 larvae; excess CKI-1 expression prematurely stops cell division while cki-1(RNAi) induces extra cell divisions, indicating that CKI-1 quantitatively regulates the amount of mitosis in postembryonic worms.
T05A6.2	cki-2	WBGene00000517	0.13333	4.753	0.468492	0.995159	cki-2 encodes a cyclin-dependent kinase (CDK) inhibitor of the CIP/KIP family, orthologous to human CDKN1C (OMIM:600856, which when mutated leads to Beckwith-Wiedemann syndrome) that may play a role in cell cycle progression during embryogenesis; CKI-2 interacts with PCN-1, a proliferating cell nuclear antigen homolog, SMO-1, a SUMO (ubiquitin related) homolog, and the RING domain-containing prot…
C05H8.1	ckk-1	WBGene00000518	0.0399846	5.56671	0.781805	1	ckk-1 encodes a serine/threonine protein kinase that is the C. elegans calcium and calmodulin-dependent protein kinase kinase (CaM-KK) ortholog; ckk-1 activity is required for CRE-dependent transcription in neurons; when expressed in vitro, CKK-1 is capable of stimulating the kinase activity of a downstream kinase, either C. elegans CMK-1 or recombinant mouse CaM-KIV, in a Ca2+/calmodulin-depende…
T23B3.4	ckr-1	WBGene00020712	-0.0363677	3.12529	0.850261	1	T23B3.4 encodes a seven transmembrane receptor that is most closely related to the mammalian cholecystokinin receptors; loss of T23B3.4 activity via RNAi, either singly or in combination with another cholecystokinin receptor-encoding gene, Y39A3B.5, has no effect on fat metabolism, however large-scale RNAi screens have reported that T23B3.4(RNAi) results in embryonic lethality and reduced brood s…
Y39A3B.5	ckr-2	WBGene00021439	0.0864104	5.2938	0.558284	1	Y39A3B.5 encodes a seven transmembrane receptor that is most closely related to the mammalian cholecystokinin receptors; loss of Y39A3B.5 activity via RNAi, either singly or in combination with another cholecystokinin receptor-encoding gene, T23B3.4, has no effect on fat metabolism.
Y47D3A.4	cku-70	WBGene00000519	-0.0422466	4.87569	0.797992	1	cku-70 encodes an ortholog of human XRCC6 (Ku70; OMIM:152690, antigen of systemic lupus erythematosus); CKU-70 is required for resistance to ionizing radiation (IR) in somatic tissues (such as motor neurons, vulva or uterus) and in endoreduplicating intestinal cells, but not in the germline; CKU-70 is also required for survival of dauer larvae subjected to IR, and for resistance of developing emb…
R07E5.8	cku-80	WBGene00000520	-0.133722	4.48819	0.543626	1	cku-80 encodes an ortholog of human XRCC5 (Ku80; OMIM:194364, antigen of systemic lupus erythematosus); CKU-80 is required for resistance to ionizing radiation (IR) in somatic tissues (such as motor neurons, vulva, uterus, or somatic gonad) and in endoreduplicating intestinal cells, but not in the germline (e.g., in dog-1-induced lesions); CKU-80 is required for growth on high NaCl, probably beca…
C15C8.2	cky-1	WBGene00000521	-0.0193118	0.935936	0.983839	1	cky-1 encodes a member of the basic helix-loop-helix/Per-Arnt-Sim (bHLH-PAS) protein family; CKY-1 physically interacts with AHA-1, and when co-expressed in vitro, an AHA-1/CKY-1 complex exhibits sequence-specific DNA binding; when co-expressed in cultured cells, the AHA-1/CKY-1 complex can stimulate reporter gene transcription; cky-1 is expressed in non-neuronal pharyngeal cells.
C09F12.1	clc-1	WBGene00000522	0.182075	5.3888	0.486115	1	clc-1 encodes a claudin homolog, closely similar to CLC-2, that is required for normal cohesion of apical junctions in epithelia; claudins are integral membrane proteins with four transmembrane sequences that are found in mammalian tight junctions (TJs), induce TJs when transgenically expressed in cells normally lacking them, and can mediate the specific conductance of of specific ions (e.g., mag…
C01C10.1	clc-2	WBGene00000523	-0.194089	3.23122	0.350297	0.933097	clc-2 encodes a claudin homolog, closely similar to CLC-1, that is required for normal cohesion of apical junctions in epithelia; claudins are integral membrane proteins with four transmembrane sequences that are found in mammalian tight junctions (TJs), induce TJs when transgenically expressed in cells normally lacking them, and can mediate the specific conductance of of specific ions (e.g., mag…
ZK563.4	clc-3	WBGene00000524	0.0250811	4.00311	0.905533	1	clc-3 encodes a claudin homolog that may regulate ion channels; CLC-3 is worm-specific, with a highly divergent sequence weakly similar to mammalian voltage-dependent calcium channel gamma subunits that are known or suspected to prevent epilepsy in vivo (e.g., stargazin; MGI:1316660); claudins are integral membrane proteins with four transmembrane sequences that are found in mammalian tight junct…
C01C10.4	clc-5	WBGene00000526	-0.318738	4.51495	0.047033	0.338424	clc-5 encodes a claudin homolog that may be required for normal cohesion of apical junctions in epithelia; CLC-5 is worm-specific, with obvious homologs only in C. elegans; CLC-5 has no obvious function in mass RNAi assays; claudins are integral membrane proteins with four transmembrane sequences that are found in mammalian tight junctions (TJs), induce TJs when transgenically expressed in cells …
F35E12.8	cld-9	WBGene00009432	0.744377	3.46737	0.0059724	0.0758645
C36B1.1	cle-1	WBGene00000527	-0.101496	5.61619	0.471677	0.996465	cle-1 encodes the only vertebrate type XV/XVIII collagen homolog in C. elegans and generates multiple developmentally regulated protein isoforms via alternative splicing; cle-1 is required for neuron migrations, including the migration of the HSN, ALM and AVM neurons, axon guidance of the sensory and motor neurons, distal tip cell migration, and for proper morphogenesis of the mail tail; cle-1 is…
F25B4.9	clec-1	WBGene00017772	-0.544054	8.2515	0.0631216	0.40658
C03H5.1	clec-10	WBGene00015403	0.379759	3.92688	0.214842	0.785592
Y53H1A.3	clec-100	WBGene00013179	0.335344	0.343277	0.624204	1
F15D3.2	clec-101	WBGene00008853	0.342802	-0.743235	0.806998	1
F33E2.3	clec-102	WBGene00009359	0.183527	0.281956	0.755979	1
T26E3.1	clec-103	WBGene00012036	-0.153178	0.641489	0.774479	1
Y18D10A.10	clec-104	WBGene00012480	0.126247	1.759	0.812898	1
Y18D10A.12	clec-106	WBGene00012482	-0.0425674	0.40971	0.974905	1
Y26D4A.4	clec-107	WBGene00012502	0.163877	0.609563	0.81417	1
Y26D4A.6	clec-108	WBGene00012504	-0.0434724	0.385281	0.969161	1
C54C8.7	clec-11	WBGene00008294	0.25185	-0.423998	0.81478	1
Y71A12B.6	clec-112	WBGene00013503	0.143203	0.301309	0.856494	1
F47G4.1	clec-113	WBGene00009822	0.403659	0.324753	0.391664	0.963567
C49A1.9	clec-114	WBGene00008190	0.238299	0.650034	0.748623	1
C49A1.6	clec-115	WBGene00008188	0.251897	0.271373	0.74259	1
K04H8.1	clec-116	WBGene00010576	0.43916	-0.0629032	0.64847	1
W04H10.4	clec-118	WBGene00021032	0.280841	0.184104	0.657989	1
F47F6.5	clec-119	WBGene00018575	0.0674854	1.94739	0.893822	1
T27F6.2	clec-12	WBGene00012103	0.28049	3.47441	0.1372	0.63906
F29A7.7	clec-120	WBGene00017917	NA	NA	NA	NA
Y25C1A.4	clec-121	WBGene00021291	0.0929377	0.450494	0.918102	1
Y25C1A.1	clec-123	WBGene00021288	0.263186	1.28183	0.617714	1
W09G10.6	clec-125	WBGene00021118	0.311375	1.05686	0.70813	1
W09G10.5	clec-126	WBGene00021117	-0.0635692	0.897504	0.915432	1
W10G11.5	clec-127	WBGene00021138	0.485791	-0.163825	0.680074	1
W10G11.15	clec-129	WBGene00021145	0.358167	-0.864085	0.759368	1
H16D19.1	clec-13	WBGene00010399	-1.36445	5.58399	2.56325e-08	2.3082e-06
W10G11.14	clec-130	WBGene00021144	NA	NA	NA	NA
W10G11.13	clec-132	WBGene00021143	NA	NA	NA	NA
C16A11.8	clec-135	WBGene00015821	-0.193177	0.689979	0.710298	1
F35D11.7	clec-136	WBGene00018047	-0.192024	-0.629824	0.784203	1
F35D11.10	clec-139	WBGene00018050	-0.0130246	2.78316	0.979131	1
H16D19.2	clec-14	WBGene00010400	-2.36312	4.31906	3.60785e-19	3.45405e-16
T05A7.2	clec-140	WBGene00020220	-0.192686	1.21086	0.672677	1
EEED8.11	clec-141	WBGene00017139	-0.332497	0.546345	0.588348	1
K01C8.8	clec-142	WBGene00010460	-0.181251	1.24489	0.581735	1
ZK673.9	clec-143	WBGene00014063	0.140837	1.02729	0.797026	1
Y48E1B.16	clec-145	WBGene00013013	-0.13509	1.50512	0.749672	1
Y48E1B.9	clec-146	WBGene00013008	-0.709703	5.2148	0.000121134	0.00323757
C04H5.2	clec-147	WBGene00007313	-0.099696	0.943068	0.841918	1
F40G9.10	clec-148	WBGene00018246	0.0953842	-0.860225	0.973992	1
K02F3.5	clec-149	WBGene00019328	0.160405	4.02854	0.321194	0.910185	K02F3.5 encodes a protein with a C-terminal C-type lectin domain that inhibits CEP-1- and HUS-1-dependent germline apoptosis, as do BMK-1, RAD-50, and RAD-51.
T07D10.4	clec-15	WBGene00011584	-1.45089	5.53517	4.55254e-10	6.57862e-08
R06B10.3	clec-150	WBGene00019914	0.0315921	4.89706	0.863446	1
F10F2.7	clec-151	WBGene00008659	0.280803	-0.185	0.725839	1
F10F2.6	clec-152	WBGene00008658	0.50861	-0.397744	0.594249	1
F10F2.8	clec-153	WBGene00008660	0.557295	0.256004	0.414081	0.974916
F10F2.5	clec-154	WBGene00008657	0.0359889	-0.341726	1	1
T04A8.3	clec-155	WBGene00011405	0.277398	0.168783	0.732664	1
F26A1.12	clec-157	WBGene00017810	0.0660034	-0.00672116	0.938159	1
R13F6.8	clec-158	WBGene00020067	NA	NA	NA	NA
T07D10.5	clec-16	WBGene00011585	-2.28192	4.28334	1.35068e-14	5.71368e-12
F09G8.8	clec-160	WBGene00017322	0.636401	2.88094	0.0075052	0.0905303
F58A4.5	clec-161	WBGene00010228	0.247186	0.161683	0.726576	1
C07A9.1	clec-162	WBGene00007399	0.284179	0.277638	0.626037	1
Y39A1B.1	clec-163	WBGene00012661	0.227583	0.851256	0.727786	1
Y55F3C.5	clec-164	WBGene00021949	-0.114875	0.21372	0.876413	1
F38A1.10	clec-165	WBGene00009523	0.802523	1.39003	0.0200416	0.186283
F38A1.5	clec-166	WBGene00009518	0.702165	4.49078	0.0216052	0.196205
F38A1.4	clec-167	WBGene00009517	0.421223	-0.267482	0.627103	1
F38A1.14	clec-169	WBGene00009526	0.44751	1.46686	0.44503	0.98793
E03H4.10	clec-17	WBGene00008477	-0.355552	6.64612	0.127472	0.615419
F38A1.1	clec-170	WBGene00009515	0.662688	1.61119	0.16134	0.693915
Y77E11A.9	clec-171	WBGene00022312	0.269584	0.282258	0.703299	1
K03H6.7	clec-172	WBGene00044719	0.488094	0.581446	0.532894	1
T26C12.6	clec-173	WBGene00044469	1.29297	4.10012	4.14641e-07	2.52252e-05
Y46C8AL.2	clec-174	WBGene00021580	1.42939	0.844267	0.0490222	0.348054
R08C7.6	clec-175	WBGene00019950	0.346429	0.55925	0.656184	1
E03H12.3	clec-176	WBGene00017110	NA	NA	NA	NA
E03H12.2	clec-177	WBGene00017109	0.126352	-0.365492	0.914925	1
T19E7.1	clec-178	WBGene00020585	-0.150059	2.99782	0.502516	1
C42D4.11	clec-179	WBGene00016597	0.246434	0.0391204	0.767916	1
F32E10.3	clec-180	WBGene00017991	0.295488	1.66	0.372971	0.953528
Y59H11AR.5	clec-181	WBGene00044511	NA	NA	NA	NA
C33D9.2	clec-182	WBGene00007897	-0.224553	0.224764	0.712738	1
T20D3.1	clec-183	WBGene00011855	NA	NA	NA	NA
F08G5.7	clec-184	WBGene00023502	-0.272847	1.28255	0.565089	1
C25G4.1	clec-185	WBGene00007729	0.193485	1.26218	0.687228	1
ZK896.7	clec-186	WBGene00014138	0.576141	4.65747	0.00465887	0.0630143
ZK896.6	clec-187	WBGene00014137	0.333325	2.80599	0.28161	0.870577
F36H5.6	clec-19	WBGene00018105	0.307388	-0.411055	0.780303	1
Y116A8A.1	clec-192	WBGene00013772	-0.115569	-0.116774	0.823388	1
Y116A8A.3	clec-193	WBGene00013774	0.199725	0.651117	0.611327	1
Y116A8A.8	clec-194	WBGene00013778	-0.148453	2.49144	0.531257	1
F26D10.12	clec-196	WBGene00009156	1.61432	2.42157	0.000315614	0.0072948
C49C3.12	clec-197	WBGene00008202	0.0163598	-0.47284	1	1
C49C3.13	clec-198	WBGene00008203	0.167789	1.79726	0.656621	1
C30H6.1	clec-199	WBGene00007820	0.0322541	1.95786	0.921098	1
B0454.7	clec-2	WBGene00015198	0.527133	1.35258	0.387402	0.960452
T07H3.5	clec-20	WBGene00020328	-0.0284723	0.509862	0.977557	1
C30H6.3	clec-201	WBGene00007821	-0.0232492	1.34784	0.958417	1
C30H6.4	clec-202	WBGene00007822	0.954472	0.0094248	0.144009	0.655864
Y46H3B.2	clec-204	WBGene00021603	0.399085	1.48339	0.372062	0.952425
Y46H3B.1	clec-205	WBGene00021602	0.0130911	1.25457	0.992532	1
F59A7.1	clec-206	WBGene00019089	2.58451	1.68432	0.00468078	0.0632097
F36F12.5	clec-207	WBGene00018096	0.520556	-0.228779	0.593088	1
Y19D10A.9	clec-209	WBGene00021224	0.404449	4.17403	0.251257	0.834464
T07H3.4	clec-21	WBGene00020327	0.334742	0.170268	0.632751	1
Y73C8C.2	clec-210	WBGene00022261	4.51604	4.05764	3.40212e-07	2.10492e-05
C50E3.1	clec-214	WBGene00016813	NA	NA	NA	NA
F26D11.5	clec-216	WBGene00017822	NA	NA	NA	NA
F26D11.9	clec-217	WBGene00017824	-0.813692	-0.408024	0.230902	0.809995
W02D7.2	clec-218	WBGene00020938	0.332562	3.16865	0.384126	0.958305
F49A5.3	clec-22	WBGene00009855	0.470885	0.610426	0.264332	0.849062
D1054.7	clec-220	WBGene00008374	-0.418127	-0.498269	0.547835	1
F17C11.5	clec-221	WBGene00008916	0.200317	0.660611	0.628456	1
C03E10.5	clec-223	WBGene00007282	0.336631	0.87864	0.548191	1
ZK863.9	clec-224	WBGene00044790	-0.410789	1.05691	0.249231	0.831837
B0365.5	clec-225	WBGene00007152	0.300185	1.86737	0.269428	0.854513
R10D12.5	clec-226	WBGene00011186	0.103966	-0.00282531	0.879484	1
F08H9.5	clec-227	WBGene00008593	0.44634	2.50236	0.159973	0.691027
H02K04.1	clec-229	WBGene00010355	NA	NA	NA	NA
T20B3.8	clec-23	WBGene00011851	-0.257818	0.661557	0.606129	1
C29F3.5	clec-230	WBGene00007806	NA	NA	NA	NA
F36G9.11	clec-232	WBGene00009487	-0.435205	0.093958	0.355581	0.937937
F21H7.4	clec-233	WBGene00009030	-0.0383039	1.60283	0.924392	1
F26D2.12	clec-234	WBGene00009150	-0.245524	-0.195399	0.808041	1
Y102A5C.7	clec-237	WBGene00013614	0.759536	-0.42169	0.413068	0.974034
Y102A5C.17	clec-238	WBGene00013622	0.311798	-0.210757	0.71323	1
Y102A5C.16	clec-239	WBGene00013621	-0.0431346	0.605464	0.945894	1
F49A5.4	clec-24	WBGene00009856	0.094702	1.07252	0.838049	1
F49H6.1	clec-240	WBGene00009905	0.142749	-0.561028	0.891083	1
C31G12.2	clec-245	WBGene00007851	0.367404	0.328424	0.590089	1
F16H6.2	clec-246	WBGene00008892	-0.285998	2.09762	0.427287	0.980241
Y51A2A.1	clec-247	WBGene00013058	0.166289	-0.535726	0.868501	1
T20B3.15	clec-25	WBGene00044331	0.0158737	1.56176	0.98175	1
F11D11.5	clec-254	WBGene00008700	NA	NA	NA	NA
F11D11.1	clec-255	WBGene00008696	0.0946332	0.630186	0.875429	1
M162.2	clec-258	WBGene00010928	0.431444	-0.0879487	0.466546	0.995159
M162.1	clec-259	WBGene00010927	0.23518	-0.214126	0.782727	1
T20B3.12	clec-26	WBGene00011852	1.0274	2.70446	1.10005e-05	0.00043032
ZC15.6	clec-261	WBGene00013834	-0.0383247	0.290576	0.957175	1
ZC15.2	clec-262	WBGene00013831	0.243584	0.919211	0.680578	1
F31D4.4	clec-264	WBGene00009291	-0.0639452	4.39727	0.839884	1
M02F4.7	clec-265	WBGene00019738	0.870827	5.33045	0.000942283	0.0176185
C25B8.4	clec-266	WBGene00016088	1.47468	4.68034	5.76169e-05	0.00175259
Y102A5B.1	clec-27	WBGene00013607	0.305582	1.28006	0.36204	0.943808
F49A5.5	clec-28	WBGene00009857	0.596654	1.63917	0.0524218	0.36312
T25E12.9	clec-29	WBGene00012024	0.167359	0.108159	0.854881	1
C41H7.7	clec-3	WBGene00016577	0.464521	2.99242	0.137252	0.63906
T20B3.11	clec-30	WBGene00014842	-0.17409	0.847565	0.655092	1
F49A5.2	clec-31	WBGene00009854	0.653794	1.41271	0.131128	0.624564
F49A5.9	clec-32	WBGene00009860	0.246214	-0.0462479	0.716972	1
F49A5.7	clec-33	WBGene00009859	0.575566	0.805532	0.23839	0.820295
T25E12.8	clec-34	WBGene00012023	-0.0985131	0.68426	0.872892	1
Y102A5B.2	clec-35	WBGene00013608	0.314037	1.43326	0.423933	0.979709
T20B3.16	clec-36	WBGene00044332	0.59799	2.60193	0.0105808	0.117071
Y102A5B.3	clec-37	WBGene00013609	-0.118555	3.47424	0.509113	1
T25E12.10	clec-38	WBGene00012025	0.0213012	0.0334865	1	1
T25E12.7	clec-39	WBGene00012022	-0.139784	0.668337	0.872115	1
Y38E10A.5	clec-4	WBGene00012583	1.01186	4.32701	0.000791305	0.0154939	clec-4 encodes a C-type lectin; clec-4 expression is upregulated in response to stressors, including pathogens and ionizing radiation.
T20B3.13	clec-40	WBGene00011853	-0.0222153	1.36483	0.949323	1
B0365.6	clec-41	WBGene00007153	0.90592	5.43722	0.0064497	0.0803562
F16H6.1	clec-42	WBGene00008891	-0.209648	6.02358	0.649448	1
R07C3.1	clec-43	WBGene00019917	0.11154	3.01501	0.656375	1
R07C3.12	clec-44	WBGene00019928	0.338493	1.43126	0.465344	0.994392
F07C4.2	clec-45	WBGene00017199	NA	NA	NA	NA
F07C4.9	clec-46	WBGene00017202	NA	NA	NA	NA
T09F5.9	clec-47	WBGene00011668	0.637626	6.03205	0.20471	0.771208	clec-47 encodes a C-type lectin; clec-47 expression is upregulated in response to stressors including ionizing radiation and bacterial infection.
C14A6.1	clec-48	WBGene00007565	-0.324778	4.85826	0.445542	0.988393
W04E12.6	clec-49	WBGene00012251	-0.50887	3.73973	0.038577	0.294962	clec-49 encodes a protein containing two calcium-dependent (C-type) lectin domains; by sequence analysis, CLEC-49 is predicted to be a secreted protein that binds carbohydrates; the Toxocara canis (canine roundworm) TES-32 protein, for which CLEC-49 is one of the most closely related C. elegans proteins, has been shown to reside in the parasite epicuticle and, in vitro, binds both galactose- and …
C35D10.14	clec-5	WBGene00016450	-0.285846	5.75038	0.312504	0.905899
W04E12.8	clec-50	WBGene00012253	-0.531471	6.28516	0.00335136	0.0483053
B0218.6	clec-51	WBGene00015050	-0.0574458	3.78915	0.809096	1
B0218.8	clec-52	WBGene00015052	0.250361	4.9448	0.514819	1
T03F1.10	clec-53	WBGene00020191	-0.0537294	1.90129	0.869868	1
F08H9.8	clec-54	WBGene00008596	0.195244	3.44589	0.32238	0.910716
F08H9.9	clec-55	WBGene00008597	-0.527752	2.19062	0.0360506	0.282489
F08H9.7	clec-56	WBGene00008595	0.211081	5.78672	0.440837	0.98642
F08H9.6	clec-57	WBGene00008594	0.605546	4.66934	0.00249401	0.0383581
ZK666.3	clec-58	WBGene00014043	-0.069801	-0.303603	0.963466	1
ZK666.5	clec-59	WBGene00014045	NA	NA	NA	NA
C35D10.15	clec-6	WBGene00016451	-0.0374452	0.151894	0.973639	1
ZK666.6	clec-60	WBGene00014046	0.210997	0.905328	0.701964	1	clec-60 encodes a C-type lectin protein with no obvious non-nematode orthologs; clec-60 appears to play a role in the innate immune respone to some bacterial pathogens, including Microbacterium nematophilum and Salmonella enterica; clec-60 transcription is induced 6.6-fold by infection with M. nematophilum, making it one of the most strongly infection-responsive genes (second only to tts-1); CLEC…
ZK666.7	clec-61	WBGene00014047	-1.02905	3.66126	9.67494e-06	0.000389352
F35C5.5	clec-62	WBGene00009393	0.0451828	5.92056	0.827188	1
F35C5.6	clec-63	WBGene00009394	0.000779117	9.48457	0.99701	1
F35C5.7	clec-64	WBGene00009395	1.07556	1.64631	0.0303956	0.252343
F35C5.8	clec-65	WBGene00009396	-0.239206	7.0526	0.116788	0.586517
F35C5.9	clec-66	WBGene00009397	0.00610219	4.44792	0.982452	1
F56D6.2	clec-67	WBGene00018971	0.194493	5.06748	0.533193	1	clec-67 encodes a C-type lectin; clec-67 expression is upregulated in response to bacterial infection; clec-67 is expressed in the intestine and its expression is regulated by the ELT-2 GATA transcription factor.
F56D6.1	clec-68	WBGene00018970	0.435858	0.197897	0.587661	1
F56D6.15	clec-69	WBGene00044642	0.235986	0.762391	0.726439	1
F10G2.3	clec-7	WBGene00017364	0.63512	5.09386	0.0129443	0.136339
Y46C8AL.3	clec-70	WBGene00021581	-0.247498	1.61307	0.710831	1
Y46C8AL.4	clec-71	WBGene00021582	-0.0242584	0.395977	0.983939	1
Y46C8AL.5	clec-72	WBGene00021583	-0.118108	6.2418	0.77431	1
Y46C8AL.1	clec-73	WBGene00021579	0.21085	1.00678	0.796233	1
Y46C8AL.8	clec-74	WBGene00021585	1.27913	0.716613	0.0696488	0.429899
Y46C8AL.9	clec-75	WBGene00021586	-0.719214	4.18067	0.00031543	0.0072948
Y46C8AR.1	clec-76	WBGene00021587	-0.857969	4.86255	0.000304885	0.0070919
Y46C8AR.3	clec-77	WBGene00044343	0.240307	1.53837	0.447987	0.988631
F47C12.2	clec-78	WBGene00018547	0.257739	1.25592	0.651422	1
F47C12.4	clec-79	WBGene00018548	0.713132	1.30112	0.14827	0.666922
Y38E10A.4	clec-8	WBGene00012582	0.252143	3.537	0.246675	0.829086
Y54G2A.39	clec-80	WBGene00043062	1.02907	3.22477	0.0214788	0.19535
Y54G2A.8	clec-82	WBGene00021873	-0.40815	2.36977	0.275457	0.862386
Y54G2A.14	clec-83	WBGene00021879	-0.360451	6.22066	0.197596	0.758712
Y54G2A.33	clec-84	WBGene00021895	-0.152092	5.46221	0.323234	0.911147
Y54G2A.6	clec-85	WBGene00021872	-0.397116	6.21153	0.0250197	0.219753
C54D1.2	clec-86	WBGene00016912	-0.167594	2.30226	0.57352	1
C25A1.8	clec-87	WBGene00007709	2.4277	5.09385	5.92755e-07	3.38e-05	clec-87 encodes a C-type lectin, paralogous to CLEC-88, C25B8.4, F26D10.12, and ZK858.3; CLEC-87 has a single chondroitin attachment site verified by mass spectrometry; clec-87 expression is upregulated in response to pathogen infection.
K10B2.3	clec-88	WBGene00019606	1.99855	3.93018	2.39785e-06	0.00011725	clec-88 encodes, by alternative splicing, two isoforms of a putatively secreted C-type lectin paralogous to CLEC-87, C25B8.4, F26D10.12, and ZK858.3; CLEC-88 has a single chondroitin attachment site verified by mass spectrometry; CLEC-88 has no obvious function in mass RNAi assays.
C09D1.2	clec-89	WBGene00015631	0.284402	2.49341	0.240465	0.821882
Y70C5C.2	clec-9	WBGene00013493	1.38935	1.71064	0.0603802	0.396361
F57C9.2	clec-90	WBGene00019009	-0.024401	3.9551	0.915307	1
ZK858.3	clec-91	WBGene00014117	1.17312	3.34144	0.000595536	0.0122129
Y52B11A.5	clec-92	WBGene00013125	-0.228942	0.374811	0.645617	1
ZK39.4	clec-93	WBGene00013929	0.396352	0.578614	0.66886	1
ZK39.8	clec-99	WBGene00013933	0.219339	-0.217847	0.784222	1
T27D12.2	clh-1	WBGene00000528	1.08461	6.08023	9.4602e-07	5.21458e-05	clh-1 encodes two CLC-type chloride channels via alternative splicing, homologous to human CLC1 (OMIM:118425) and CLC2 (OMIM:600570); CLH-1a and CLH-1b are required for maintenance of normal body shape; null mutations of clh-1 cause abnormal alae and a wider body than normal, with the body phenotype being reversible by culture medium of high osmolarity.
B0491.8	clh-2	WBGene00000529	0.195435	5.41806	0.171681	0.714943	clh-2 encodes a chloride channel protein that is required for embryonic viability; may have two transcripts transcribed from alternative promoters, and the two transcripts might be expressed in different cell types.
E04F6.11	clh-3	WBGene00000530	-0.0486576	5.42417	0.792896	1	The clh-3 gene encodes a chloride channel homologous to the mammalian channel ClC-2.
T06F4.2	clh-4	WBGene00000531	-0.278374	4.03496	0.0549966	0.373697	A homolog of a mammalian CIC-type chloride channel that is uniquely expressed in adult worms.
C07H4.2	clh-5	WBGene00000532	-0.131168	6.36299	0.397443	0.965575	The clh-5 gene encodes a chloride channel, whose human homologs include CLC1 and CLCN5; the latter homolog is imvolved in receptor-mediated endocytosis.
R07B7.1	clh-6	WBGene00000533	-0.281885	5.24712	0.0944495	0.517481	clh-6 encodes a voltage-gated chloride channel orthologous to the human CLCN7 chloride channel (OMIM:602727, which when mutated lead to osteopetrosis); although the precise role of CLH-6 in C. elegans development and/or behavior is not yet known, CLH-6 expression is detected in two GABA-ergic neurons, RMEL and RMER, suggesting that CLH-6 could play a role in membrane excitability and/or GABA pack…
C44B7.4	clhm-1	WBGene00016626	0.337502	2.54298	0.137859	0.639789	clhm-1 encodes a calcium ion channel; clhm-1 is required for normal locomotion; when expressed in Xenopus oocytes, CLHM-1 localizes to the plasma membrane and produces voltage-dependent, outwardly rectifying currents; in C. elegans, CLHM-1 is expressed in sensory neurons and muscles where it localizes to the plasma membrane, including the ciliary membrane.
T05B11.3	clic-1	WBGene00020246	0.112096	6.63197	0.561351	1
T25F10.6	clik-1	WBGene00020808	-0.199127	8.70798	0.297969	0.890078
M01A8.2	clip-1	WBGene00010796	-0.15599	6.93712	0.312913	0.905899
ZC395.2	clk-1	WBGene00000536	-0.066611	4.36413	0.724132	1	clk-1 encodes the C. elegans ortholog of COQ7/CAT5, a highly conserved demethoxyubiquinone (DMQ) hydroxylase that is necessary for the biosynthesis of ubiquinone (coenzyme Q, Q9) from 5-demethoxyubiquinone (DMQ9); in C. elegans, CLK-1 activity is required for normal physiological rates of growth, development, behavior, and aging, as well as for normal brood sizes.
C07H6.6	clk-2	WBGene00000537	-0.221869	4.6561	0.231793	0.811849	The clk-2 gene encodes an ortholog of the S. cerevisiae telomere length-regulating protein Tel2p that has been shown to bind a number of DNA structures in vitro, including single-, double- and four-stranded DNA; in C. elegans, CLK-2 activity is required for the DNA damage and S phase replication checkpoints, for embryonic development, and for normal biological rhythms and life span; a functional …
F07B10.1	cln-3.1	WBGene00000539	1.01625	3.31239	0.00321658	0.0468508	cln-3.1 encodes a predicted transmembrane protein that comprises one of three C. elegans homologs of human CLN3; as loss of cln-3.1 activity via deletion mutation results in no obvious abnormalities, the precise role of cln-3.1 in C. elegans development and/or behavior is not yet known.
C01G8.2	cln-3.2	WBGene00000540	-0.136592	4.3509	0.374243	0.954096	cln-3.2 encodes a predicted transmembrane protein that comprises one of three C. elegans homologs of human CLN3 (OMIM:607042, mutations are associated with Batten disease (also known as juvenile neuronal ceroid lipofuscinosis), a recessively inherited childhood neurodegenerative lysosomal storage disease); loss of cln-3.2 activity via large-scale RNAi screens has been reported to result in either…
ZC190.1	cln-3.3	WBGene00000541	0.014459	2.73699	0.981593	1	cln-3.3 encodes a predicted transmembrane protein that comprises one of three C. elegans homologs of human CLN3, (OMIM:607042, mutations are associated with Batten disease (also known as juvenile neuronal ceroid lipofuscinosis), a recessively inherited childhood neurodegenerative lysosomal storage disease); as loss of cln-3.3 via large-scale RNAi screens results in no obvious abnormalities, the p…
C06G4.2	clp-1	WBGene00000542	-0.683445	8.44659	2.08488e-05	0.000748008	clp-1 encodes a calpain homolog that has significant identity to mammalian calpains over its whole length and that contains motifs typical of calpains, including a thiol (cysteine) protease active site and a Ca[2+]-binding domain; CLP-1 is required, in parallel with TRA-3 but in series with ASP-3 and ASP-3, for degenerative (necrotic-like) cell death in neurons induced by mutations such as mec-4(…
T04A8.16	clp-2	WBGene00000543	-0.13088	4.76942	0.46479	0.994392	clp-2 encodes a large calpain subunit that contains two predicted MIT (microtubule interacting and trafficking) domains and is homologous to the mammalian Calpain 7 proteins and the atypical, nuclear-localized Aspergillus calpain, PalB; by homology, CLP-2 is predicted to function as a calcium-dependent, cysteine protease that is involved in intracellular proteolysis and peptidolysis; however, as …
Y47H10A.1	clp-3	WBGene00000544	0.0128327	3.08115	0.981979	1	clp-3 encodes an atypical calpain, which is a calcium regulated thiol protease; clp-3 is orthologous to the human calpains, that include CAPN1, CAPN11 and CAPN12; reducing the function of clp-3 via RNAi did not yield any obvious phenotypes, possibly due to functional redundancy among clp genes in C. elegans.
Y39A3CL.5	clp-4	WBGene00000545	-0.5217	6.66791	0.00124835	0.0220871	clp-4 encodes a large calpain subunit that is homologous to Drosophila CalpainB and the mammalian muscle-specific Calpain 3 proteins (OMIM:114240, mutations are associated with limb-girdle muscular dystrophy); by homology, CLP-4 is predicted to function as a nonlysosomal, calcium-dependent, cysteine protease that is involved in intracellular proteolysis and peptidolysis; however, as loss of clp-4…
Y77E11A.10	clp-6	WBGene00000546	-0.0944038	2.40918	0.795968	1	clp-6 encodes a calpain homolog that has significant identity to mammalian calpains over its whole length and that contains motifs typical of calpains, including a thiol (cysteine) protease active site and a Ca[2+]-binding domain; CLP-6 is not required for degenerative (necrotic-like) cell death in neurons induced by mutations such as mec-4(d), deg-3(d), or gsa-1(gf), since clp-6(RNAi) has no eff…
Y77E11A.11	clp-7	WBGene00000547	-0.0962419	6.16935	0.529273	1	clp-7 encodes a member of the calpain family of cysteine proteases.
F59A2.4	clpf-1	WBGene00010304	0.27573	4.08142	0.139652	0.643828
ZK970.2	clpp-1	WBGene00014172	-0.149626	4.18602	0.389375	0.962335	clpp-1 encodes a mitochondrial protein, homologous to bacterial ClpP, required to initiate the stress response to unfolded mitochondrial proteins; as with its bacterial ortholog, CLPP-1 is predicted to be a proteolytic subunit of a Clp-like protease, with an N-terminal region required for mitochondrial localization, and a C-terminal region of ClpP similarity; in response to a mutation stressing m…
F56D1.4	clr-1	WBGene00000548	0.180329	7.11863	0.345449	0.929265	A receptor tyrosine phosphatase that negatively regulates the FGF receptorsignaling pathway; it localizes to the plasma membrane.
C07H6.3	cls-1	WBGene00015580	0.0132133	5.7355	0.945484	1
R107.6	cls-2	WBGene00000549	0.296215	6.25078	0.0336842	0.269986	cls-2 encodes one of three predicted orthologs of mammalian CLASPs and of Drosophila ORBIT/MAST, microtubule-binding proteins required for fibroblast polarization and mitosis; cls-2 is required in mass RNAi assays for embryonic development and normal mitotic spindles; it has been claimed that, in an RNAi screen of potential microtubule tip-binding proteins, only cls-2(RNAi) yielded embryonic leth…
ZC84.3	cls-3	WBGene00013847	0.0894248	6.24112	0.636704	1
F55H2.6	clu-1	WBGene00000550	0.236941	7.8264	0.19236	0.750209	clu-1 encodes an ortholog of CLU1/TIF31 in S. cerevisiae, which directs proper cytoplasmic distribution of mitochondria and physically interacts with eukaryotic translation initiation factor 3 (eIF3); worm CLU-1 may be required for the proper distribution of mitochondria.
C50F7.2	clx-1	WBGene00000551	-0.694092	3.26726	0.0124834	0.132947	clx-1 encodes a protein that contains 23 copies of a 15 amino acid repeat, possibly derived from a collagen triplet; there is no transcript evidence for this locus.
T21H3.3	cmd-1	WBGene00000552	-0.111498	9.27042	0.538319	1	cmd-1 encodes a putative homolog of calmodulin 1 that affects growth rate and fertility.
K07A9.2	cmk-1	WBGene00000553	-0.0464805	5.12964	0.779681	1	cmk-1 encodes a Ca+2/calmodulin-dependent protein kinase I (CaMK1); CMK-1 activity is required, cell autonomously and downstream of the cyclic nucleotide-gated channel TAX-4, for several aspects of AFD thermosensory neuron differentiation, including expression of the gcy-8 guanylyl cyclase and nhr-38 nuclear hormone receptor genes and morphology of the AFD sensory endings; cmk-1 activity is thus …
C41D11.5	cmt-1	WBGene00016564	0.0720411	3.29214	0.748586	1
F55C10.1	cnb-1	WBGene00000554	-0.0630798	7.23853	0.746444	1	cnb-1 encodes an ortholog of calcineurin B, the regulatory subunit of the protein phosphatase 2B with four EF-hand motifs for calcium binding, that binds TAX-6 (a calcineurin A ortholog) in a calcium-dependent manner; CNB-1 binds calcium, enhances the phosphatase activity of TAX-6 in vitro, promotes transcription of rcn-1, and is required for normal cuticle formation, sperm morphology, and brood …
R09B5.2	cnc-1	WBGene00000555	NA	NA	NA	NA	cnc-1 encodes one of eleven C. elegans caenacin peptides; CNC-1 is predicted to be a secreted protein that functions as an antimicrobial peptide in the innate immune response; cnc-1 expression is induced in response to infection with the fungus Drechmeria coniospora and also in response to injury (needle wounding); overexpression of a genomic cluster containing cnc-1, along with the five other cn…
VK10D6R.1	cnc-10	WBGene00012152	-0.0414417	4.95427	0.854145	1	cnc-10 encodes one of eleven C. elegans caenacin peptides.
R09B5.13	cnc-11	WBGene00044900	0.623568	2.84522	0.0674529	0.421576	cnc-11 encodes one of eleven C. elegans caenacin peptides; CNC-11 is predicted to be a secreted protein that functions as an antimicrobial peptide in the innate immune response; cnc-11 expression is upregulated in response to infection with the fungus Drechmeria coniospora and also in response to injury (needle wounding); cnc-11 expression is also modestly upregulated in response to osmotic stres…
R09B5.3	cnc-2	WBGene00000556	0.279569	0.0333566	0.615453	1	cnc-2 encodes one of eleven C. elegans caenacin peptides; cnc-2 functions as a secreted antimicrobial peptide in the innate immune response: cnc-2 expression is strongly induced in the epidermis upon infection by the fungal pathogen and overexpression of cnc-2 promotes survival after D. coniospora infection; cnc-2 expression is also induced upon infection by the Gram negative bacterium Serratia m…
R09B5.8	cnc-3	WBGene00000557	-0.537272	3.68914	0.0865569	0.490642	cnc-3 encodes one of eleven C. elegans caenacin peptides; CNC-3 is predicted to be a secreted protein that, based upon similarity to CNC-2, -4, and -6, may function as an antimicrobial peptide in the innate immune response.
R09B5.9	cnc-4	WBGene00000558	1.11795	3.51772	0.000196533	0.0048833	cnc-4 encodes one of eleven C. elegans caenacin peptides; cnc-4 expression is strongly induced after infection by the fungus Drechmeria coniospora, suggesting that it functions as a secreted antimicrobial peptide in the innate immune response.
Y46E12A.1	cnc-6	WBGene00000560	0.763439	2.03464	0.0449738	0.327885	cnc-6 encodes one of eleven C. elegans caenacin peptides; cnc-6 expression is strongly induced after infection by the fungus Drechmeria coniospora, suggesting that it functions as a secreted antimicrobial peptide in the innate immune response.
F53H2.2	cnc-7	WBGene00010005	-0.258423	-0.511789	0.795877	1	cnc-7 encodes one of eleven C. elegans caenacin peptides.
F41E7.8	cnc-8	WBGene00009624	0.107955	4.56069	0.756236	1	cnc-8 encodes one of eleven C. elegans caenacin peptides.
C34E10.7	cnd-1	WBGene00000561	0.143277	0.615177	0.746324	1	cnd-1 encodes a basic helix-loop-helix protein that is most closely related to the vertebrate NeuroD transcription factors; during development, CND-1 is predicted to function as a transcriptional regulator whose activity is required for several aspects of motor neuron fate specification, including cell division patterns, proper spatiotemporal expression of fate-specific markers, and normal axonal…
F45E12.1	cnep-1	WBGene00018474	0.105552	5.61076	0.57368	1	cnep-1 encodes a putative serine/threonine phosphatase, orthologous to budding yeast Nem1p and human DULLARD; CNEP-1 is expressed in pharynx and intestine; CNEP-1 is distantly similar to FCP-1 and SCPL-1, -3, and -4; by homology, CNEP-1 is predicted to reside in the endoplasmic reticulum membrane in a complex with SPO-7 that functions to dephosphorylate the phosphatidic acid phosphatase LPIN-1 an…
F14H8.6	cng-1	WBGene00000562	0.0527406	2.87567	0.79848	1
Y76B12C.1	cng-2	WBGene00022295	-0.12938	3.36786	0.51622	1
F38E11.12	cng-3	WBGene00000563	-0.00446458	1.35433	1	1	cng-3 is predicted to encode a cyclic nucleotide gated (CNG) channel that is required for wild-type thermotolerance; cng-3 is expressed in five sensory neurons, including the thermosensory neuron AFD.
T09E8.3	cni-1	WBGene00011648	0.0856574	5.03098	0.685475	1
R01H10.8	cnk-1	WBGene00000564	-0.0240176	5.62621	0.8874	1	cnk-1 encodes a protein that contains a SAM domain, a PDZ domain, and a PH domain.
Y46G5A.10	cnp-2	WBGene00012901	0.159865	2.95421	0.552185	1
T23C6.3	cnp-3	WBGene00020725	0.457105	4.36703	0.0241199	0.213916
Y17G7B.15	cnt-1	WBGene00000565	-0.0897718	5.13081	0.567647	1	cnt-1 encodes a homolog of centaurin beta, an Arf GTPase activating protein (Arf GAP) that also contains a pleckstrin homology domain and C-terminal ankyrin repeats; by homology, CNT-1 is predicted to function as an Arf GAP that stimulates Arf GTPase activity and links cell signaling with cytoskeletal rearrangements and membrane trafficking; however, as loss of cnt-1 activity via large-scale RNAi…
Y39A1A.15	cnt-2	WBGene00000566	0.21112	6.33885	0.194019	0.75303	cnt-2 encodes an Arf GTPase-activating protein (GAP) of the AGAP family; cnt-2 is required for asymmetric cell divisions; genetic analyses suggest that cnt-2 influences asymmetric cell divisions through regulation of receptor-mediated endocytosis and regulation of actomyosin dynamics at the cell cortex.
ZK632.6	cnx-1	WBGene00000567	0.0456064	7.30476	0.839225	1	cnx-1 encodes the C. elegans ortholog of calnexin, a type I Ca2+-binding integral membrane protein of the endoplasmic reticulum (ER); CNX-1 binds calcium and is predicted to function as a molecular chaperone required for glycoprotein folding and maturation as well as regulation of intracellular calcium homeostasis; in C. elegans, cnx-1 activity is required at 25 degrees C for wild-type levels of …
C52B9.3	coel-1	WBGene00016866	-0.258464	6.17615	0.223181	0.797942	coel-1 encodes, by alternative splicing, two isoforms of a putative tubulin-destabilizing protein orthologous to human TBCEL (LRRC35; OMIM:610451), and paralogous to K07H8.1 and human TBCE (OMIM:604934, mutated in HRD); coel-1(tm2136) homozygotes are viable, and COEL-1 has no obvious function in mass RNAi assays.
C48E7.5	cof-2	WBGene00000583	-0.187596	3.37115	0.272802	0.859613	cof-2 encodes a type II transmembrane protein containing extracellular collage-like repeats and a highly conserved olfactomedin (OLF) domain, and is homologous to human GLC1A, which when mutated leads to glaucome primary open angle (OMIM:137750); a cof-2::gfp promoter fusion is expressed in muscle cells.
R03C1.3	cog-1	WBGene00000584	-0.0462283	3.12511	0.807585	1	cog-1 encodes the C. elegans ortholog of the vertebrate Nkx6 homeodomain proteins; cog-1 activity is required for multiple aspects of reproductive system development, including connection of uterus to the vulva and vulval cell specification, as well as for specification of left/right asymmetry in the ASE taste receptor sensory neurons where cog-1 acts in ASER to suppress the ASEL cell fate; cog-1…
Y54E10A.2	cogc-1	WBGene00003258	-0.12392	4.74329	0.523464	1	cogc-1 encodes an ortholog of mammalian COG-1/ldlBp (OMIM:606973, mutated in congenital disorder of glycosylation type II), a subunit of lobe A of the conserved oligomeric Golgi complex (COGC); COGC-1 is required for normal gonadal distal tip cell migration, a process that also requires COGC-3 and six other orthologs of COGC subunits; COGC-1 is also required for normal vulval morphology, growth r…
C06G3.10	cogc-2	WBGene00000585	-0.0436913	4.89961	0.795235	1	cogc-2 encodes an ortholog of mammalian COG-2, a subunit of lobe A of the conserved oligomeric Golgi complex (COGC); COGC-2 is required for normal gonadal distal tip cell migration, a process that also requires seven other orthologs of COGC subunits; like other lobe A subunits in both C. elegans and S. cerevisiae, COGC-2 is strongly required for normal function, while lobe B subunits are only par…
Y71F9AM.4	cogc-3	WBGene00022121	0.0473098	5.01806	0.744919	1	cogc-3 encodes an ortholog of mammalian COG-3/Sec34, a subunit of lobe A of the conserved oligomeric Golgi complex (COGC); COGC-3 is required for normal gonadal distal tip cell migration, a process that also requires COGC-1 and six other orthologs of COGC subunits; COGC-3 is also required for normal vulval morphology, growth rate, ventral nerve cord fasciculation, and adult locomotion; COGC-3 has…
Y51H7C.6	cogc-4	WBGene00021784	0.0693247	5.79771	0.666089	1	cogc-4 encodes an ortholog of mammalian COG-4, a subunit of lobe A of the conserved oligomeric Golgi complex (COGC); COGC-4 is required for normal gonadal distal tip cell migration, a process that also requires seven other orthologs of COGC subunits; like other lobe A subunits in both C. elegans and S. cerevisiae, COGC-4 is strongly required for normal function, while lobe B subunits are only par…
C43E11.11	cogc-5	WBGene00016608	-0.240201	4.81555	0.16217	0.695888	cogc-5 encodes an ortholog of mammalian COG-5, a subunit of lobe B of the conserved oligomeric Golgi complex (COGC); COGC-5 is also orthologous to Drosophila FOUR WAY STOP (required for fly spermatogenesis); COGC-5 is weakly required for normal gonadal distal tip cell migration, a process that also requires seven other orthologs of COGC subunits; like other lobe B subunits in both C. elegans and …
K07C11.9	cogc-6	WBGene00019481	-0.0149785	5.03294	0.927491	1	cogc-6 encodes an ortholog of mammalian COG-6, a subunit of lobe B of the conserved oligomeric Golgi complex (COGC); COGC-6 is weakly required for normal gonadal distal tip cell migration, a process that also requires seven other orthologs of COGC subunits; like other lobe B subunits in both C. elegans and S. cerevisiae, COGC-6 is only partially required for normal function, while lobe A subunits…
R02D3.2	cogc-8	WBGene00019820	0.0112309	4.67862	0.952249	1	cogc-8 encodes an ortholog of mammalian COG-8, a subunit of lobe B of the conserved oligomeric Golgi complex (COGC); COGC-8 is weakly required for normal gonadal distal tip cell migration, a process that also requires seven other orthologs of COGC subunits; like other lobe B subunits in both C. elegans and S. cerevisiae, COGC-8 is only partially required for normal function, while lobe A subunits…
K08A8.3	coh-1	WBGene00000591	-0.0476161	5.6272	0.768668	1	coh-1 encodes a RAD21 homolog that affects embryonic viability and is believed to affect cohesion of sister chromatids in somatic cells; expressed in the distal tip cells of the gonad, embryonic, and somatic cells
F08H9.1	coh-3	WBGene00000592	0.0111912	2.62259	0.970313	1	coh-3 encodes a member of the Rad21/Rec8-like family of cohesion proteins known as kleisins; COH-3, along with its paralogs REC-8 and COH-4, function as members of a meiotic cohesin complex that mediates sister chromatid cohesion; coh-3 transcripts are expressed in the germline.
Y45G5AM.8	coh-4	WBGene00021560	0.0852628	2.62162	0.760285	1	coh-4 encodes a member of the Rad21/Rec8-like family of cohesion proteins known as kleisins; COH-4, along with its paralogs REC-8 and COH-3, function as members of a meiotic cohesin complex that mediates sister chromatid cohesion.
B0222.8	col-10	WBGene00000599	-0.298908	7.26672	0.328219	0.914598	col-10 encodes a collagen protein; expressed exclusively in hypodermal cells
K02D7.3	col-101	WBGene00000675	-0.165319	2.40205	0.612177	1	col-101 encodes a cuticle collagen; loss of col-101 via large-scale RNAi screens results in animals that are pale and slow growing.
C18H7.3	col-102	WBGene00000676	0.309947	3.06876	0.678878	1	col-102 encodes a cuticle collagen.
F56B3.1	col-103	WBGene00000677	-0.948782	7.77914	0.00534453	0.0699907	col-103 encodes a collagen.
F58F6.1	col-104	WBGene00000678	0.227847	2.31893	0.664435	1
F58F6.2	col-105	WBGene00000679	0.345496	1.92841	0.589789	1
Y77E11A.15	col-106	WBGene00000680	0.563505	1.34397	0.42565	0.979709	col-106 encodes a predicted cuticular collagen.
C34H4.4	col-107	WBGene00000681	-0.612263	7.22023	0.0315	0.258689
Y41D4A.2	col-108	WBGene00000682	0.226126	1.52496	0.709886	1
Y38C1BA.3	col-109	WBGene00000683	0.768322	2.34273	0.19472	0.754249	col-109 encodes a cuticular collagen; loss of col-109 via large-scale RNAi screens results in no obvious defects.
F19C7.7	col-110	WBGene00000684	0.312751	0.526098	0.708856	1
F29B9.9	col-111	WBGene00000685	0.329718	1.37397	0.5409	1
C34D4.15	col-113	WBGene00000687	1.27138	1.28065	0.00607756	0.0768247
D2024.8	col-114	WBGene00000688	0.430891	0.587684	0.520149	1
Y42H9B.1	col-115	WBGene00000689	0.0982514	2.14247	0.829183	1
F17E9.1	col-116	WBGene00000690	0.647287	-0.241438	0.498244	1
T28C6.4	col-117	WBGene00000691	-0.637375	6.49143	0.0103174	0.115208
T11B7.3	col-118	WBGene00000692	-0.161596	5.11381	0.600062	1
C53B4.5	col-119	WBGene00000693	0.316283	1.66946	0.620457	1
F15H10.1	col-12	WBGene00000601	-0.348309	2.78027	0.553835	1	col-12 encodes a member of the collagen superfamily containing collagen triple helix repeats (20 copies); expressed throughout development but expression peaks after each larval molt when new cuticle is being secreted and deposited, and after the L4 to adult larval molt.
Y11D7A.11	col-120	WBGene00000694	0.266015	1.33794	0.619223	1
F56D5.1	col-121	WBGene00000695	0.890655	2.33327	0.0532097	0.366901	col-121 encodes a cuticle collagen required for resistance to the endocrine disrupting chemical bisphenol A (BPA); col-121(nx3) and col-121(RNAi) animals are hypersensitive to BPA, but are otherwise wild-type (e.g., they have normal body shape); BPA hypersensitivity has also been observed for dpy-2(e8), dpy-7(e88) and dpy-10(e128) mutants.
T05A1.2	col-122	WBGene00000696	0.207827	1.748	0.685396	1
C24F3.6	col-124	WBGene00000698	0.125058	1.75487	0.810758	1
C29F4.1	col-125	WBGene00000699	0.269263	2.04234	0.511732	1
F54D1.2	col-126	WBGene00000700	0.0887793	0.446009	0.890984	1
F54D1.3	col-127	WBGene00000701	0.0519678	0.591302	0.919627	1
M18.1	col-129	WBGene00000703	-0.00811685	2.61055	0.989256	1
F15H10.2	col-13	WBGene00000602	-0.222801	2.10875	0.700021	1	col-13 encodes a collagen which is expressed in all stages of development, like sqt-3 (col-1), col-3, col-10, col-11, col-12, and col-14; collagen genes with this expression profile may be specifically required to construct the L1 cuticle (and, perhaps, less specifically required for cuticles at other stages); the amino- and carboxyl-terminal cysteine-rich regions of COL-13 are most closely relat…
F08G5.4	col-130	WBGene00000704	0.696387	1.58105	0.209833	0.778368
C39E9.9	col-132	WBGene00000706	0.163079	0.22393	0.82748	1
F52B11.4	col-133	WBGene00000707	-0.233064	1.87112	0.693514	1
M199.5	col-135	WBGene00000708	0.135949	1.41358	0.869481	1
Y51H4A.28	col-136	WBGene00000709	0.0322812	2.10115	0.953126	1
Y51H4A.9	col-137	WBGene00000710	0.249272	1.6914	0.642449	1
C52D10.13	col-138	WBGene00000711	-0.227529	1.8668	0.674068	1
F41F3.4	col-139	WBGene00000712	0.0827722	1.75	0.897711	1
C46A5.3	col-14	WBGene00000603	1.54749	1.82802	0.00326433	0.0473511	col-14 encodes a collagen protein that affects vulval morphology in a large-scale RNAi screen; mRNA expressed in embryos and transcript levels peak during each larval stage.
F26F12.1	col-140	WBGene00000713	-0.15922	1.99988	0.800397	1
T15B7.5	col-141	WBGene00000714	-0.428889	0.866133	0.5999	1
T15B7.4	col-142	WBGene00000715	-0.751595	2.48842	0.189644	0.745932
T15B7.3	col-143	WBGene00000716	0.031837	2.158	0.959994	1
B0222.6	col-144	WBGene00000717	-0.276912	7.14799	0.381627	0.95655
B0222.7	col-145	WBGene00000718	0.5504	0.795308	0.396188	0.964335
T06E4.6	col-146	WBGene00000719	-0.866647	4.91131	0.0420304	0.312948
T06E4.4	col-147	WBGene00000720	-0.895538	6.90788	0.0238153	0.211834
C12D8.8	col-148	WBGene00000721	-0.108981	0.218188	0.874687	1
B0024.1	col-149	WBGene00000722	-0.253457	0.818959	0.650356	1
B0024.2	col-150	WBGene00000723	-0.38686	2.28945	0.207815	0.775733
AC3.6	col-151	WBGene00000724	-0.363386	1.06213	0.346344	0.930273
F32G8.5	col-152	WBGene00000725	-0.22926	0.538883	0.71567	1
F17C11.3	col-153	WBGene00000726	-0.357955	3.1596	0.151181	0.674344
F55C10.2	col-154	WBGene00000727	-0.490825	1.62985	0.108582	0.560546
F55C10.3	col-155	WBGene00000728	-0.324846	2.14026	0.250652	0.834437
F57B7.3	col-156	WBGene00000729	-0.0322868	0.625894	0.97381	1
T11F9.9	col-157	WBGene00000730	0.638817	0.0258358	0.315358	0.907677
D2023.7	col-158	WBGene00000731	0.272346	-0.0546807	0.70913	1
F57B1.3	col-159	WBGene00000732	-0.7261	5.12221	0.09358	0.513955
F57B1.4	col-160	WBGene00000733	-0.788742	7.01393	0.0681261	0.423518
C50B6.4	col-161	WBGene00000734	0.763943	1.57516	0.0912182	0.506644
Y2H9A.3	col-162	WBGene00000735	0.381464	1.23386	0.600379	1
F46B3.17	col-163	WBGene00000736	0.0929786	1.55029	0.908205	1
T21D9.1	col-164	WBGene00000737	-0.374495	-0.396041	0.687428	1
F14H12.1	col-165	WBGene00000738	0.744004	3.00016	0.0972714	0.526911
T07H6.3	col-166	WBGene00000739	-0.462458	5.8824	0.221545	0.79573
T10E10.2	col-167	WBGene00000740	-0.386644	1.89873	0.368172	0.950714
T10E10.1	col-168	WBGene00000741	-0.278935	0.52353	0.594048	1
T10E10.5	col-169	WBGene00000742	0.468166	0.252067	0.395438	0.964301
F11G11.10	col-17	WBGene00000606	0.173611	1.63695	0.82426	1	col-17 encodes a collagen which is expressed in all developmental stages except eggs, like col-15, col-16, and col-20; collagen genes with this expression pattern may be used for synthesis of cuticles after the L1 stage (e.g., the L4 cuticle).
T10E10.6	col-170	WBGene00000743	0.178123	-0.00671243	0.791982	1
T10E10.7	col-171	WBGene00000744	0.522209	-0.747436	0.651735	1
F38B6.5	col-172	WBGene00000745	0.326413	1.1085	0.45663	0.992743
F41C6.5	col-173	WBGene00000746	0.260764	0.0563126	0.770016	1
F46C8.2	col-174	WBGene00000747	-0.140802	1.77579	0.77402	1
C35B8.1	col-175	WBGene00000748	-0.0203834	2.26166	0.972525	1
ZC373.7	col-176	WBGene00000749	-0.369264	2.21136	0.33867	0.923694
F59F3.2	col-177	WBGene00000750	0.158195	2.30228	0.578246	1
C34F6.2	col-178	WBGene00000751	-0.0824443	1.15515	0.905265	1
C34F6.3	col-179	WBGene00000752	0.391395	0.855035	0.635448	1
C44C10.1	col-180	WBGene00000753	0.21671	0.89061	0.713386	1
W03G11.1	col-181	WBGene00000754	0.00501487	2.55318	1	1	col-181 is homologous to the human gene PRO ALPHA 1(I) COLLAGEN (COL1A1; OMIM:120150), which when mutated leads to osteogenesis imperfecta.
R09A8.4	col-182	WBGene00000755	0.425624	0.889731	0.478414	0.99918
F02D10.1	col-183	WBGene00000756	0.194474	1.02477	0.855618	1
F15A2.1	col-184	WBGene00000757	0.482325	1.2777	0.369803	0.951578
H06A10.2	col-185	WBGene00000758	0.198911	1.75971	0.814848	1
E03G2.4	col-186	WBGene00000759	0.27302	1.5779	0.451328	0.99007
C30F2.1	col-187	WBGene00000760	0.454719	0.342295	0.517523	1
ZK1193.1	col-19	WBGene00000608	0.0839661	1.70893	0.896308	1	col-19 encodes a member of the collagen superfamily containing collagen triple helix repeats (20 copies) that is required for normal structure of the alae; expressed during the L2-to-dauer and L4-to-adult molts with strongest expression in adult animals.
W01B6.7	col-2	WBGene00000593	0.513257	0.784977	0.578098	1	col-2 encodes a member of the collagen superfamily containing collagen triple helix repeats (20 copies); expression peaks during the molt that separates the L2 larval and dauer stages as the dauer cuticle is being formed, and mRNA is expressed at low levels in post-dauer L4 larvae and in adult animals.
F11G11.11	col-20	WBGene00000609	0.203406	1.47714	0.782274	1	col-20 encodes a collagen; its expression pattern and mutant phenotypes are unknown.
T28C6.6	col-3	WBGene00000594	-0.695382	7.09808	0.00942081	0.107641	col-3 encodes a collagen protein that affects body morphogenesis, larval viability, and locomotion in large scale RNAi screens; mRNA is expressed during all developmental stages examined (in embryos, during the L2 to dauer molt, during the dauer to L4 larval molt, and during the L4 to adult molt).
F36A4.6	col-33	WBGene00000610	0.253214	0.414527	0.775104	1	col-33 encodes a predicted cuticular collagen; by homology, col-33 is predicted to play a role in cuticle biosynthesis and regulation of body size and morphogenesis; however, as loss of col-33 activity via large-scale RNAi screens does not result in any obvious abnormalities, the precise role of COL-33 in C. elegans development and/or behavior is not yet known.
F36A4.10	col-34	WBGene00000611	0.246436	3.40373	0.361544	0.943244	col-34 encodes a cuticle collagen protein and is a critical component of male tail cuticle organization affecting ray morphology.
C15A11.1	col-35	WBGene00000612	0.204534	1.00248	0.763235	1	col-35 encodes a collagen that is individually dispensable for viability and gross morphology in mass RNAi screens; the amino- and carboxyl-terminal cysteine-rich regions of COL-35 are most closely related to those of COL-8, COL-19, and COL-39.
ZK863.2	col-37	WBGene00000614	0.844592	0.0630362	0.397256	0.965524	col-37 encodes a cuticle collagen.
F54C9.4	col-38	WBGene00000615	0.30938	0.538621	0.641353	1	col-38 encodes a member of the collagen superfamily containing collagen triple helix repeats (20 copies) required for normal body morphology.
C09G5.4	col-39	WBGene00000616	-0.935804	6.53383	0.00755256	0.0909206	col-39 encodes a collagen that is individually dispensable for viability and gross morphology in mass RNAi screens; the amino- and carboxyl-terminal cysteine-rich regions of COL-39 are most closely related to those of COL-8, COL-19, and COL-35.
T13B5.4	col-40	WBGene00000617	0.0191217	3.63404	0.976063	1	col-40 encodes a cuticle collagen protein that belongs to the col-6 cuticle collagen family; col-40 transcript is present in L1 larvae and at the L2d-dauer molt.
T10B10.1	col-41	WBGene00000618	0.169391	1.71706	0.824383	1	col-41 encodes a cuticle collagen.
Y69H2.14	col-42	WBGene00013489	-0.92789	8.19814	0.00658507	0.0817628
ZC513.8	col-43	WBGene00000620	0.377935	1.07236	0.623244	1	col-43 encodes a collagen that is individually dispensable for viability and gross morphology in mass RNAi screens.
F54B11.2	col-44	WBGene00000621	0.483378	1.4491	0.483915	1	col-44 encodes a cuticle collagen.
F53G12.7	col-45	WBGene00000622	-0.0433681	1.50072	0.957604	1	col-45 encodes a cuticle collagen.
Y18H1A.13	col-46	WBGene00000623	0.56868	0.142952	0.463954	0.994392	col-46 encodes a cuticle collagen.
Y54E10BL.2	col-48	WBGene00000625	0.705814	2.28872	0.202924	0.767732	col-48 encodes a cuticle collagen.
K09H9.3	col-49	WBGene00000626	0.240547	0.494881	0.744749	1	col-49 encodes a cuticle collagen.
T28F2.6	col-50	WBGene00000627	0.299371	2.20552	0.719201	1	col-50 encodes a cuticle collagen.
T28F2.8	col-51	WBGene00000628	0.514194	1.85283	0.565618	1	col-51 encodes a cuticle collagen.
D1007.2	col-52	WBGene00000629	0.544762	0.172382	0.540817	1	col-52 encodes a collagen; loss of col-52 via large-scale RNAi screens results in embryonic lethality and body morphology defects.
M01A12.1	col-53	WBGene00000630	-0.111591	2.58362	0.611642	1
F33D11.3	col-54	WBGene00000631	0.440199	0.878084	0.428074	0.980241
T05E7.2	col-55	WBGene00000632	0.1794	-0.20783	0.818327	1
T08B2.2	col-56	WBGene00000633	0.833329	0.059123	0.224089	0.798759
F26B1.4	col-58	WBGene00000634	0.112857	0.536247	0.866054	1
F22D6.10	col-60	WBGene00000636	0.308841	-0.0896937	0.654121	1
C01H6.1	col-61	WBGene00000637	0.0776195	1.58296	0.870758	1
C15A11.6	col-62	WBGene00000638	-1.33249	-0.302795	0.0304365	0.252343
ZK265.2	col-63	WBGene00000639	0.629857	0.727412	0.468587	0.995159
F52F12.2	col-64	WBGene00000640	NA	NA	NA	NA
K08C9.4	col-65	WBGene00000641	0.779464	2.23265	0.168077	0.707152
F15D3.3	col-66	WBGene00000642	0.575477	0.709524	0.48727	1
C50D2.4	col-68	WBGene00000644	0.141597	0.822401	0.836488	1
K01A2.7	col-69	WBGene00000645	-0.0643061	1.80888	0.874825	1
C15A11.5	col-7	WBGene00000596	-0.306798	-0.484238	0.658351	1	col-7 encodes a member of the collagen superfamily containing collagen triple helix repeats (20 copies); expressed during the L2-to-dauer molt and the L4-to-adult molt.
Y49F6B.10	col-71	WBGene00000647	0.103937	2.28568	0.795707	1
W09G10.1	col-72	WBGene00000648	-0.0731446	1.36081	0.907484	1
F11G11.12	col-73	WBGene00000649	0.118101	1.30156	0.882892	1
ZK1248.2	col-74	WBGene00000650	1.79721	2.25244	5.14172e-05	0.00159061
K03H9.2	col-75	WBGene00000651	0.59969	-0.136985	0.393395	0.964109
M110.1	col-76	WBGene00000652	0.300079	3.47907	0.257369	0.84197
M195.1	col-77	WBGene00000653	0.801673	2.33094	0.0582746	0.386444	col-77 encodes a cuticular collagen; as loss of col-77 activity via RNAi screens results in no obvious defects, the precise role of col-77 in C. elegans development and/or behavior is not yet known.
W07A12.5	col-78	WBGene00000654	-0.00770578	0.649526	1	1
C09G5.3	col-79	WBGene00000655	-0.105416	1.10428	0.854275	1
F11H8.3	col-8	WBGene00000597	-0.0981434	1.12518	0.865166	1	col-8 encodes a collagen, individually dispensable for viability and gross morphology, which is specifically expressed in dauers and adults but not in eggs or L4 larvae, like col-7, col-18, and col-19; the amino- and carboxyl-terminal cysteine-rich regions of COL-8 are most closely related to those of COL-19, COL-35, and COL-39.
C09G5.5	col-80	WBGene00000656	-1.0226	6.53126	0.0119214	0.12786
F38A3.1	col-81	WBGene00000657	-0.0738551	0.846746	0.940077	1
F33A8.9	col-83	WBGene00000658	0.219156	0.633846	0.74416	1
K12D12.3	col-84	WBGene00000659	0.0892034	0.91356	0.90165	1	col-84 encodes a nematode cuticular collagen; RNAi experiments that target col-84 (as well as neighboring genes) result in defects in embryonic and larval development, body morphology, and reproduction.
T21B4.2	col-85	WBGene00000660	0.388987	1.38107	0.644105	1
Y81G3A.5	col-86	WBGene00000661	0.618998	0.487415	0.403677	0.970277
Y39G8C.4	col-87	WBGene00000662	0.0847278	2.34173	0.866684	1
W05G11.3	col-88	WBGene00000663	0.125075	2.71339	0.85025	1
F17C8.2	col-89	WBGene00000664	0.0372567	2.5102	0.923894	1
F54B11.1	col-9	WBGene00000598	0.534218	0.271617	0.598428	1	col-9 encodes a collagen protein.
C29E4.1	col-90	WBGene00000665	0.479248	0.223527	0.602876	1
F09G8.6	col-91	WBGene00000666	-0.539871	4.03796	0.0551317	0.374057	col-91 encodes a cuticle collagen; loss of col-91 via large-scale RNAi results in no obvious defects.
W05B2.6	col-92	WBGene00000667	-0.783328	2.70747	0.137263	0.63906
W05B2.5	col-93	WBGene00000668	-0.735372	0.88141	0.246766	0.829086
W05B2.1	col-94	WBGene00000669	-0.670802	3.59615	0.123727	0.60469
Y41C4A.16	col-95	WBGene00000670	-0.0299791	1.33913	0.966815	1	col-95 encodes a collagen.
Y41C4A.19	col-96	WBGene00000671	-0.122081	1.60783	0.810396	1
ZK1010.7	col-97	WBGene00000672	1.00262	2.03076	0.0718352	0.438778	col-97 encodes a cuticular collagen; loss of col-97 activity via large-scale RNAi screens results in defects in body morphology and locomotion.
F14F7.1	col-98	WBGene00000673	-1.07028	8.51164	0.00233618	0.0365078
F29C4.8	col-99	WBGene00000674	0.338678	3.08593	0.262801	0.846714
C44B9.5	com-1	WBGene00008082	-0.0204584	3.30053	0.932958	1	com-1 encodes an ortholog of budding yeast Sae2p, Arabidopsis AtCOM1, and human RBBP8 (CTIP; OMIM:604124) and C20orf151; like its yeast ortholog, COM-1 is probably required for completing meiotic recombination; meiotic chromosomes in com-1 mutants pair normally, but form irregular chromatin aggregates instead of diakinesis bivalents; while meiotic DNA double-strand breaks (DSBs) are formed, they …
F37E3.3	comp-1	WBGene00018158	0.365284	-0.32904	0.578645	1
F53B3.2	comt-1	WBGene00018741	-0.0232414	1.43985	0.978883	1
Y32B12A.3	comt-2	WBGene00012518	-0.379534	0.809685	0.459374	0.99384
Y40B10A.2	comt-3	WBGene00021487	0.0771181	4.12326	0.754962	1
Y40B10A.6	comt-4	WBGene00021491	1.30111	1.82091	0.0272114	0.233259
Y40B10A.7	comt-5	WBGene00021492	0.115378	1.46396	0.827252	1
Y71F9AL.17	copa-1	WBGene00022119	0.113083	7.60065	0.478962	0.99918	Y71F9AL.17 encodes an alpha subunit of the coatomer (COPI) complex; in mass RNAi assays, Y71F9AL.17 is required for embryonic viability, fertility, normal locomotion, and normally rapid growth.
Y25C1A.5	copb-1	WBGene00021292	0.104122	6.9131	0.493748	1	Y25C1A.5 encodes a beta subunit of the coatomer (COPI) complex; in mass RNAi assays, Y25C1A.5 is required for fertility, adult viability, osmoregulation, and general health.
F38E11.5	copb-2	WBGene00009542	0.0675364	6.81338	0.732123	1	F38E11.5 encodes a beta' (beta-prime) subunit of the coatomer (COPI) complex; in mass RNAi assays, F38E11.5 is required for fertility and general health.
C13B9.3	copd-1	WBGene00015734	0.169518	6.39102	0.28	0.868749	C13B9.3 encodes a delta subunit of the coatomer (COPI) complex; in mass RNAi assays, C13B9.3 is required for fertility and general health.
F45G2.4	cope-1	WBGene00009732	0.0272322	5.62403	0.879858	1	F45G2.4 encodes an epsilon subunit of the coatomer (COPI) complex; in mass RNAi assays, F45G2.4 is required for larval viability, proper locomotion, and properly rapid growth.
F59E10.3	copz-1	WBGene00010333	-0.190217	5.96396	0.266205	0.850445	F59E10.3 encodes a zeta subunit of the coatomer (COPI) complex; in mass RNAi assays, F59E10.3 is required for embryonic, larval, and adult viability, for fertility, and for normal osmoregulation.
C24A11.9	coq-1	WBGene00000761	-0.175099	6.13143	0.373122	0.953537	coq-1 encodes a putative hexaprenyl pyrophosphate synthetase, orthologous to S. cerevisiae COQ1; COQ-1 is required for ubiquinone (coenzyme Q9) biosynthesis and for normally short lifespan; coq-1 mutants have slowed pharyngeal pumping, and eventually arrest as paralysed larvae before dying; coq-1(RNAi) animals have reduced levels of coenzyme Q9 and superoxide, and have abnormally long lifespans; …
[truncated: 20,582 more rows]

## Sheet: (2) I_24hrvs.IF_24hr
sequence	symbol	primaryIdentifier	logFC	logCPM	PValue	FDR	briefDescription
2L52.1		WBGene00007063	-0.139109	3.6833	0.657736	1	2L52.1 encodes a protein with sequence similarity to GLI-family zinc-finger transcription factors; deletion mutations in 2L52.1 are reported to be homozygous viable.
2RSSE.1		WBGene00007064	-0.107015	4.4676	0.621135	1	2RSSE.1 encodes a protein that contains a RhoGAP domain and that is similar to Drosophila RhoGAP71E whose activity regulates the number and guidance of mushroom body axons.
2RSSE.2			0.194726	1.96416	0.500309	1
2RSSE.3		WBGene00044951	0.143693	1.70212	0.697095	1
2RSSE.6		WBGene00199694	NA	NA	NA	NA
3R5.1	pot-3	WBGene00007065	0.281408	2.82508	0.337954	1
3R5.2		WBGene00007066	0.159067	2.2526	0.512392	1
4R79.1	nas-6	WBGene00003525	0.0215093	2.41979	0.948465	1	nas-6 encodes an astacin-like metalloprotease.
4R79.2		WBGene00007067	-0.107995	2.5915	0.565933	1
6R55.2		WBGene00007069	NA	NA	NA	NA
AC3.1	sri-20	WBGene00005532	0.800023	-0.531387	0.225058	1
AC3.10	spe-10	WBGene00004964	0.317702	1.29051	0.360178	1	spe-10 encodes a DHHC-CRD family zinc-finger transmembrane protein with homologs in other eukaryotes and is predicted to be a palmitoyl transferase; spe-10 is required during spermatogenesis and thus for fertility; specifically, spe-10 is required for the proper biogenesis and functioning of specialized Golgi-derived fibrous body-membranous organelle (FB-MO) complexes during spermatid formation; …
AC3.13		WBGene00077504	NA	NA	NA	NA
AC3.2	ugt-49	WBGene00007070	-0.000224026	5.07237	1	1
AC3.3	abu-1	WBGene00000024	0.732166	-0.302586	0.33003	1	abu-1 encodes a transmembrane protein with a predicted signal sequence, a glutamine/asparagine-rich domain and multiple cysteine-rich repeats (DUF139); abu-1 expression is induced by blockage of the endoplasmic reticulum unfolded protein response, and ABU-1 may help protect the organism from damage by improperly folded nascent protein; when expressed in COS1 cells, ABU-1 localizes to the endoplas…
AC3.4	pqn-2	WBGene00004098	1.13816	-0.291614	0.121188	1	The protein product of this gene is predicted to contain a glutamine/asparagine (Q/N)-rich ('prion') domain, by the algorithm of Michelitsch and Weissman (as of the WS77 release of WormBase, i.e., in wormpep77).
AC3.5		WBGene00007071	-0.333154	5.44672	0.189745	1
AC3.6	col-151	WBGene00000724	0.075337	1.06213	0.861053	1
AC3.7	ugt-1	WBGene00007072	-0.169071	2.88439	0.679133	1
AC3.8	ugt-2	WBGene00007073	-0.10425	4.64806	0.657739	1
AC3.9		WBGene00044022	0.0192798	1.9093	0.967678	1
AC7.1	tkr-3	WBGene00006428	0.161435	2.80431	0.451909	1
AC7.11	21ur-4118	WBGene00047233	NA	NA	NA	NA
AC7.2	soc-2	WBGene00004929	-0.140896	6.79359	0.386449	1	soc-2 encodes a leucine-rich repeat protein; soc-2 functions downstream in the let-60/Ras and egl-15/FGF receptor signaling pathways to positively and negatively regulate signaling through these pathways, respectively, and thus affect such processes as vulval development, osmoregulation, and muscle membrane extension; consistent with its role in regulating Ras-mediated signal transduction, SOC-2 …
AC7.27	21ur-7559	WBGene00166862	NA	NA	NA	NA
AC7.3		WBGene00014997	NA	NA	NA	NA
AC7.51	21ur-15344	WBGene00171386	NA	NA	NA	NA
AC7.83	21ur-9616	WBGene00174933	NA	NA	NA	NA
AC8.1		WBGene00004054	0.140283	2.44509	0.546094	1
AC8.10		WBGene00043988	-0.044304	4.19757	0.866813	1
AC8.11		WBGene00043989	-0.000992843	3.84233	0.999282	1
AC8.12		WBGene00043990	0.132476	2.16173	0.586122	1
AC8.2		WBGene00007074	-0.0971847	0.457463	0.907935	1
AC8.3		WBGene00007075	-0.0191558	4.18763	0.945982	1
AC8.4		WBGene00007076	-0.0340059	3.8058	0.858681	1
AC8.5		WBGene00007077	-0.061641	2.11158	0.839473	1
AC8.6		WBGene00007078	-0.383255	1.63144	0.12055	0.999914
AC8.7		WBGene00007079	0.0639691	2.25249	0.790104	1
AC8.9		WBGene00043987	NA	NA	NA	NA
AH10.1	acs-10	WBGene00007082	0.153277	1.40728	0.84227	1
AH10.2		WBGene00007083	0.705684	-0.18493	0.197229	1
AH10.3		WBGene00007084	0.167131	0.657901	0.630446	1
AH10.4		WBGene00007085	NA	NA	NA	NA
AH6.1	gcy-1	WBGene00001528	1.06178	1.17346	0.113644	0.981862	gcy-1 encodes a receptor-type, transmembrane guanylyl cyclase; animals mutant for gcy-1 exhibit a potassium chemotaxis defect; a gcy-1::gfp reporter fusion is expressed in neurons, including ASER, and the intestine.
AH6.10	sra-6	WBGene00005032	0.887313	2.47556	0.00330266	0.165497	sra-6 encodes a seven-transmembrane chemosensory receptor; an sra-6::GFP fusion reporter is expressed in the ASH (strongly) and ASI (weakly) amphid sensory neurons, the PVQ interneurons, and in the SPD and SPV male spicule neurons; sra-6 expression in the ASH neurons is positively regulated by KIN-29, a serine/threonine kinase, acting through the HDA-4 class II histone deacetylase and the MEF-2 M…
AH6.11	sra-7	WBGene00005033	-0.111405	0.136987	0.83462	1	sra-7 encodes a seven transmembrane receptor predicted to function as a G protein-coupled chemosensory receptor; an SRA-7::GFP fusion protein is expressed in the ASK amphid sensory neurons.
AH6.13	sra-16	WBGene00005042	-0.508596	-0.637205	0.477173	1
AH6.14	sra-9	WBGene00005035	0.242285	0.390453	0.651739	1
AH6.16	sra-15	WBGene00005041	NA	NA	NA	NA
AH6.2	sfxn-1.1	WBGene00007080	0.340689	0.518936	0.557663	1
AH6.3		WBGene00007081	0.0159129	-0.467253	1	1
AH6.5	mex-6	WBGene00003231	0.23463	3.4746	0.469929	1	mex-6 encodes a CCCH zinc-finger protein highly similar to MEX-5 that functions with MEX-5 to affect embryonic viability, establish soma germline asymmetry in embryos and establish PIE-1, MEX-1, and POS-1 asymmetry in embryos, and also affects formation of intestinal cells; MEX-6 and MEX-5 may act downstream of the PAR proteins.
AH6.6	sra-2	WBGene00005028	NA	NA	NA	NA	sra-2 encodes a predicted chemosensory receptor.
AH6.7	sra-3	WBGene00005029	NA	NA	NA	NA	sra-3 encodes a predicted chemosensory receptor.
AH6.9	sra-5	WBGene00005031	NA	NA	NA	NA
AH9.1		WBGene00014998	-0.336188	2.28703	0.21868	1
AH9.2	crn-4	WBGene00000797	-0.594	2.80431	0.0408127	0.682965	crn-4 encodes a DEDD family DNase, a cell death-related nuclease; crn-4 exhibits both DNase and RNase activities; crn-4 is believed to function in a large multinuclease complex, the degradeosome, whose components include the protein products of cps-6, crn-1, crn-5, cpy-13 and other non-nuclease components like wah-1, to promote apoptotic DNA degradation; crn-4 has been shown to bind DNA through i…
AH9.3		WBGene00014999	-0.0303679	3.36002	0.880609	1
AH9.4		WBGene00015000	-0.0867253	2.61823	0.659826	1
AH9.6		WBGene00044701	-0.0809038	4.88946	0.638166	1	AH9.6 encodes a novel protein that contains two predicted transmembrane domains and that is conserved in other nematode species.
AH9.7		WBGene00175029	NA	NA	NA	NA
B0001.1	lin-24	WBGene00003010	-0.325381	5.60904	0.0394646	0.681083	lin-24 encodes a protein containing a domain found in bacterial toxins such as the Bacillus sphaericus Mtx3 mosquitocidal toxin; lin-24 was originally identified in screens for mutations that result in altered vulval cell lineages and morphological examination of animals carrying a gain-of-function lin-24 mutation indicates that some of the Pn.p cells that normally make up the vulva undergo inapp…
B0001.2		WBGene00007087	-0.13678	3.78949	0.449662	1
B0001.3		WBGene00007088	0.0199675	5.73196	0.894231	1
B0001.4		WBGene00007089	-0.0158965	5.2554	0.925026	1
B0001.5		WBGene00007090	-0.0141902	5.09074	0.934511	1
B0001.6	eri-12	WBGene00007091	-0.119919	7.6922	0.689796	1
B0001.7		WBGene00007092	0.0815068	3.32868	0.679553	1
B0001.8		WBGene00007093	0.111616	4.61262	0.51775	1
B0019.1	amx-2	WBGene00000138	0.0463857	5.22955	0.799943	1
B0019.2		WBGene00007094	-0.0727854	4.73557	0.651139	1
B0024.1	col-149	WBGene00000722	0.463312	0.818959	0.390692	1
B0024.10		WBGene00007100	-0.0834666	3.30577	0.751081	1
B0024.11		WBGene00007101	-0.147389	5.31082	0.402944	1
B0024.12	gna-1	WBGene00001646	0.052795	3.13257	0.846603	1	gna-1 encodes one of two C. elegans glucosamine 6-phosphate N-acetyltransferases (GNAs); by homology, GNA-1 is predicted to be required for the formation of UDP-N-acetylglucosamine, a substrate in chitin synthesis, Golgi and cytoplasmic glycosylation, and GPI anchoring; gna-1, like chs-2, is expressed pharyngeally rather than in germline, and (unlike its paralog gna-2) does not have an osmoticall…
B0024.13		WBGene00007102	-0.212226	4.20471	0.314392	1
B0024.14	crm-1	WBGene00007103	-0.0880133	7.19641	0.627177	1	crm-1 encodes a predicted transmembrane protein with multiple extracellular cysteine-rich (CR) domains that is the C. elegans ortholog of vertebrate CRIM1 (Cysteine-RIch Motor neuron 1); genetic analyses indicate that CRM-1 functions non-autonomously to positively regulate DBL-1/BMP-mediated signaling in the pathway that controls body size determination; in addition, loss of crm-1 activity via RN…
B0024.15		WBGene00007104	-0.398531	2.43035	0.0818639	0.890612
B0024.17		WBGene00197715	NA	NA	NA	NA
B0024.2	col-150	WBGene00000723	-0.0490221	2.28945	0.881969	1
B0024.3		WBGene00007096	-0.000862168	3.18737	1	1
B0024.4		WBGene00007097	0.347243	2.36564	0.452717	1
B0024.6	gcy-6	WBGene00001533	0.0703809	1.74156	0.83994	1	gcy-6 encodes a predicted guanylate cyclase; expressed in the ASEL neurons.
B0024.8	che-12	WBGene00000491	-0.181143	4.47786	0.380785	1	che-12 encodes a conserved protein that contains at least seven predicted HEAT repeats; CHE-12 activity is required continuously in sensory neurons for formation of distal ciliary segments and thus, for normal sensory cilium morphology and function and chemotaxis to a subset of attractants, including sodium chloride; a che-12::gfp promoter fusion is expressed in the two phasmid neurons and the su…
B0024.9	trx-2	WBGene00007099	-0.0341125	5.89138	0.862643	1
B0025.1	vps-34	WBGene00006932	-0.104249	6.85139	0.576376	1	vps-34 encodes an ortholog of the phosphoinositide 3-kinase VPS34 in S. cerevisiae, a protein that regulates multiple steps in endocytosis, and that is required for growth at normal rates during development; in C. elegans, vps-34 is required for vesicular trafficking, including endocytosis, apoptotic cell clearance, and autophagy.
B0025.2	csn-2	WBGene00000814	-0.0609153	5.96034	0.783744	1	csn-2 encodes a homolog of COP9 signalosome complex subunit 2 that affects embryonic viability and growth rate.
B0025.4		WBGene00015001	-0.153566	3.6246	0.435145	1	B0025.4 encodes a small, novel protein; microarray analyses suggest that B0025.4 belongs to the class of strictly maternal genes and SAGE experiments detect highest levels of expression in purified oocytes, N2 embryos, and pharynx cells; B0025.4 is part of C. elegans operon CEOP1288.
B0025.5		WBGene00194700	0.779791	-0.354555	0.26598	1
B0034.1		WBGene00015002	0.165454	3.99427	0.39756	1
B0034.15		WBGene00200579	NA	NA	NA	NA
B0034.2		WBGene00015003	NA	NA	NA	NA
B0034.3	casy-1	WBGene00000403	-0.0794458	9.03475	0.620717	1	casy-1 encodes a type I transmembrane protein with two extracellular cadherin domains and an LG/LNS domain that is the sole C. elegans calsyntenin/alcadein ortholog; genetic studies indicate that in C. elegans casy-1 activity is required, in parallel to the insulin-like signaling pathway, for several types of learning, including salt chemotaxis learning, temperature learning, olfactory adaptation…
B0034.4		WBGene00015004	0.121234	1.02691	0.747015	1
B0034.5		WBGene00015005	0.0679725	1.63545	0.830927	1
B0034.7		WBGene00044394	NA	NA	NA	NA	B0034.7 is a predicted gene that can encode a small, novel protein that has similarity to a predicted C. remanei protein and to a region of a hypothetical protein from the anammox bacterium Candidatus Kuenenia stuttgartiensis.
B0034.8		WBGene00196414	NA	NA	NA	NA
B0035.1		WBGene00007105	-0.000427042	5.3526	1	1
B0035.10	his-45	WBGene00001919	NA	NA	NA	NA	his-45 encodes an H3 histone.
B0035.11	leo-1	WBGene00007110	-0.0764965	5.32807	0.694442	1	leo-1 encodes the C. elegans ortholog of mammalian and Saccharomyces cerevisiae LEO1 that is a member of the PAF1 (Polymerase-Associated Factor 1) complex; by homology LEO-1 is predicted to function in the regulation of transcription.
B0035.12	sart-3	WBGene00007111	-0.121708	5.48281	0.449064	1
B0035.13		WBGene00007112	1.66373	5.05218	1.11802e-10	4.32697e-08
B0035.14	dnj-1	WBGene00001019	-0.10111	5.86017	0.532886	1	This gene encodes a protein containing a DnaJ ('J') domain.
B0035.15		WBGene00007113	-0.120737	3.76653	0.533942	1
B0035.16	mttu-1	WBGene00007114	0.0510297	2.28341	0.844449	1	mttu-1 encodes a mitochondrial tRNA 2-thiouridylase orthologous to human TRMU (tRNA 5-methylaminomethyl-2-thiouridylate methyltransferase); by homology, nuclear-encoded MTTU-1 is predicted to catalyze the 2-thiolation of uridine at the wobble position (U34) of mitochondrial tRNAs and thereby promote mitochondrial protein synthesis and respiratory function.
B0035.18		WBGene00044290	0.571921	1.15034	0.0970088	0.937127
B0035.19		WBGene00196590	NA	NA	NA	NA
B0035.2	dnj-2	WBGene00001020	-0.417642	4.00823	0.0358259	0.649724	This gene encodes a protein containing a DnaJ ('J') domain.
B0035.3		WBGene00007106	-0.141081	4.23298	0.613181	1
B0035.4	pfd-4	WBGene00007107	0.0762879	5.29734	0.682162	1	pfd-4 encodes a putative prefoldin subunit 4, orthologous to human PFDN4 (OMIM:604898), that is dispensable for viability; PFD-4 is redundant for prefoldin function in C. elegans; pfd-4(gk403) mutants and pfd-4(RNAi) animals, unlike animals undergoing RNAi against most prefoldin subunits, have no obvious phenotypes.
B0035.5	gspd-1	WBGene00007108	-0.241662	6.47987	0.270961	1	gspd-1 encodes a protein orthologous to human GLUCOSE-6-PHOSPHATE DEHYDROGENASE (G6PD; OMIM:305900), which when mutated leads to disease.
B0035.6		WBGene00007109	0.0388671	3.85958	0.799489	1
B0035.7	his-47	WBGene00001921	NA	NA	NA	NA	his-47 encodes an H2A histone; by homology, HIS-47 is predicted to function as a nucleosome component required for packaging of DNA into chromatin; his-47 is a replication-dependent histone locus that resides in a histone gene-rich region on chromosome IV.
B0035.8	his-48	WBGene00001922	NA	NA	NA	NA	his-48 encodes an H2B histone; by homology, HIS-48 is predicted to function as a nucleosome component required for packaging of DNA into chromatin; his-48 is a replication-dependent histone locus that resides in a histone gene-rich region on chromosome IV.
B0035.9	his-46	WBGene00001920	NA	NA	NA	NA	his-46 encodes an H4 histone.
B0041.1		WBGene00015006	0.475009	-0.400924	0.49477	1
B0041.2	ain-2	WBGene00015007	0.092933	8.03327	0.558985	1	ain-2 encodes, by alternative splicing, three isoforms of an unfamiliar protein paralogous to AIN-1, and homologous to Brugia malayi 14748.m00068, 14052.m00191, and 14963.m01790; AIN-2 protein binds GEI-4 and GEI-16 in yeast two-hybrid experiments; AIN-2 and its nematode homologs have weak similarity to human TNRC6A (GW182; OMIM:610739) and Drosophila GAWKY; ain-2 has no obvious function in mass …
B0041.3	lmd-2	WBGene00015008	0.00142887	3.32387	1	1
B0041.4	rpl-4	WBGene00004415	-0.204157	11.6564	0.43323	1	rpl-4 encodes a large ribosomal subunit L4 protein.
B0041.5		WBGene00015009	-0.213678	5.59684	0.188809	1	B0041.5 encodes a predicted transmembrane transporter that displays similarity to members of the F5 subfamily of solute carrier family 35 (SLC35F5) proteins that function as nucleotide sugar transporters; loss of B0041.5 activity via RNAi results in decreased intestinal dipeptide uptake and a slight reduction in fat droplet diameter compared to control animals; loss of B0041.5 activity has also b…
B0041.6	ptps-1	WBGene00015010	0.230164	2.77881	0.446832	1	B0041.6 is orthologous to the human gene 6-PYRUVOYLTETRAHYDROPTERIN SYNTHASE (PTS; OMIM:261640), which when mutated leads to disease.
B0041.7	xnp-1	WBGene00006961	-0.0709648	7.16562	0.711367	1	xnp-1 encodes an ATP-dependent DNA helicase of the SNF2 family that is orthologous to human XNP/ATR-X, which is associated with a number of X-linked mental retardation syndromes; in C. elegans, xnp-1 activity is required at high temperatures for embryogenesis, somatic gonad development, fertility, and vulval morphogenesis; in addition, animals doubly mutant for xnp-1 and lin-35/Rb, hpl-2/HP1, or …
B0041.8		WBGene00015011	-0.0756314	4.42504	0.644669	1
B0047.1	bath-20	WBGene00015012	0.234549	0.660474	0.56558	1
B0047.2	btb-3	WBGene00015013	0.0201278	2.23173	0.955715	1
B0047.3	bath-24	WBGene00015014	0.208564	1.68738	0.506998	1
B0047.4	math-1	WBGene00015015	NA	NA	NA	NA
B0047.5	bath-14	WBGene00015016	0.0409571	1.53496	0.915308	1
B0198.1	tsp-20	WBGene00006646	0.128288	4.13603	0.474271	1
B0198.2		WBGene00007115	0.193814	3.54558	0.264338	1
B0198.3		WBGene00007116	-0.000279118	4.40835	1	1
B0205.1		WBGene00015017	-0.0516662	4.65611	0.721637	1
B0205.10		WBGene00015024	-0.0295695	1.15357	0.970273	1
B0205.11	mrpl-9	WBGene00015025	-0.076814	5.9528	0.684084	1
B0205.12		WBGene00044413	0.108248	2.34656	0.763105	1
B0205.13		WBGene00044644	-0.569519	1.57742	0.119837	0.997633	B0205.13 encodes a small, novel protein conserved in C. remanei and C. briggsae.
B0205.14		WBGene00044646	NA	NA	NA	NA	B0205.14 is a predicted gene that can encode a small, novel protein conserved in C. remanei and C. briggsae.
B0205.16		WBGene00198848	NA	NA	NA	NA
B0205.2	srz-85	WBGene00015018	0.557486	0.0630279	0.293196	1
B0205.3	rpn-10	WBGene00004466	0.0151679	5.93732	0.92673	1	rpn-10 encodes a protein that contains two ubiquitin interaction motifs and is a member of the von Willebrand factor, type A superfamily similar to the mouse 26S proteasome non-ATP regulatory subunit 4.
B0205.4		WBGene00015019	-0.105099	1.5246	0.73349	1	The B0205.4 gene encodes a homolog of the human gene FUT1, which when mutated leads to leukocyte adhesion deficiency, type II (OMIM:266265).
B0205.5		WBGene00015020	NA	NA	NA	NA
B0205.6		WBGene00015021	-0.0632911	5.52396	0.709698	1
B0205.7	kin-3	WBGene00002191	-0.0228516	8.51361	0.893063	1	kin-3 encodes an ortholog of the catalytic subunit of casein kinase II alpha, which in Drosophila and mammals is required for normal circadian rhythms, and which directly phosphorylates the Drosophila PERIOD protein (which itself regulates circadian rhythms); by analogy, KIN-3 might be expected to help regulate heterochronic functions dependent on such proteins as LIN-42.
B0205.8		WBGene00015022	0.0641266	3.78247	0.738314	1
B0205.9		WBGene00015023	0.0411345	4.1677	0.798402	1
B0207.1		WBGene00015026	0.585607	0.69436	0.340559	1
B0207.10		WBGene00015033	-0.010741	0.768922	1	1
B0207.11		WBGene00015034	NA	NA	NA	NA	B0207.11 encodes a nematode-specific protein probably required for a normally high ovulation rate; B0207.11 has no obvious non-nematode homologs, but does have a putative N-terminal coiled-coil domain and an SH2 motif, and is is paralogous to four other C. elegans proteins (F42G4.6, F44F4.10, T08G11.2, and Y81G3A.1); B0207.11(tm322) hermaphrodites show abnormal egg-laying, retaining significantly…
B0207.12	avr-14	WBGene00000232	-0.140273	5.92198	0.380464	1	avr-14 encodes an alpha-type subunit of a glutamate-gated chloride channel homologous to human GLRA2, which when mutated leads to hyperekplexia (OMIM:149400); AVR-14 affects sensitivity to the antiparisitic drug, ivermectin, in parallel with avr-15 and glc-1 and in a genetic pathway with unc-9; it functions in the extrapharyngeal nervous system, and is expressed in a subset of neurons in the ring…
B0207.14		WBGene00197736	NA	NA	NA	NA
B0207.2		WBGene00015027	-0.0833129	2.45207	0.692205	1
B0207.3	gpa-14	WBGene00001676	-0.0554276	3.62596	0.760659	1	gpa-14 encodes a member of the G protein alpha subunit family of heterotrimeric GTPases; gpa-14 is expressed in ASI, ASJ, ASH, ASK, ADE, PHA, PHB ALA, AVA, CAN, DVA, PVQ, RIA, and in vulval muscle, and also exhibits faint expression in the vulval hypodermis.
B0207.4	air-2	WBGene00000099	-0.0694532	3.47569	0.778151	1	air-2 encodes an aurora/Ipl1-related serine/threonine protein kinase that affects embryonic viability and chromosome segregation during meiosis and mitosis and is required for cytokinesis; AIR-2 has two functions during mitosis, one in chromosome segregation, and a second, independent function in cytokinesis through ZEN-4; AIR-2 and ZEN-4 may act in parallel to a second pathway that includes CYK-…
B0207.5		WBGene00015028	-0.0330299	3.39306	0.951329	1
B0207.6		WBGene00015029	-0.134587	4.30009	0.389505	1
B0207.7		WBGene00015030	-0.0759397	0.938008	0.897681	1
B0207.9		WBGene00015032	NA	NA	NA	NA
B0212.1	otpl-1	WBGene00015035	-0.110085	3.0532	0.612728	1	otpl-1 encodes an ortholog of otopetrins such as human OTOP1 (OMIM:607806), OTOP2 (OMIM:607827), and OTOP3 (OMIM:607828), along with other homologs in fish and insects (such as crustacean OTOPLb); otopetrins are predicted to have 12 transmembrane helices; by homology with OTOP1 and OTOPLb, OTPL-1 might regulate intracellular calcium fluxes during extracellular stimuli, promote extracellular calci…
B0212.2	sre-5	WBGene00015036	-0.285515	2.55231	0.468805	1
B0212.3		WBGene00015037	0.0278142	3.27195	0.868797	1
B0212.4	nstp-6	WBGene00015038	-0.170947	3.4533	0.438158	1
B0212.5	osm-9	WBGene00003889	-0.058233	4.2489	0.811646	1	osm-9 encodes a TRPV channel homologous to capsaicin receptors; osm-9 is involved in sensory responses to a subset of chemical stimuli and to ASH neuron-mediated osmotic and mechanical stimuli; OSM-9 is also involved in adaptation to volatile odorants and salts; OSM-9 is expressed in a variety of sensory neurons and shows neuron-specific localization to either the cell body or the cilium.
B0212.6			0.376531	0.269008	0.341756	1
B0212.9		WBGene00201697	NA	NA	NA	NA
B0212.t1		WBGene00022894	NA	NA	NA	NA
B0213.10	cyp-34A5	WBGene00015040	-0.346893	2.74874	0.199517	1
B0213.11	cyp-34A6	WBGene00015041	0.0702767	2.53413	0.768724	1
B0213.12	cyp-34A7	WBGene00015042	-0.601907	2.93995	0.316821	1
B0213.14	cyp-34A8	WBGene00015043	-0.493798	3.74462	0.0206779	0.497528
B0213.15	cyp-34A9	WBGene00015044	0.99804	5.04073	0.090255	0.922336
B0213.16	cyp-34A10	WBGene00015045	0.942199	3.88823	0.246215	1
B0213.17	nlp-34	WBGene00015046	0.539269	3.78097	0.122963	1
B0213.2	nlp-27	WBGene00003765	-0.205156	4.27991	0.350733	1	nlp-27 encodes a predicted neuropeptide with homology to C. elegans nlp-28 through nlp-31.
B0213.3	nlp-28	WBGene00003766	-0.170004	3.90431	0.467661	1	nlp-28 encodes a neuropeptide-like protein.
B0213.4	nlp-29	WBGene00003767	-0.13172	6.07988	0.563087	1	nlp-29 encodes an antimicrobial, neuropeptide-like protein; nlp-29 appears to play a role in innate immunity, as its expression in the epidermis is strongly induced following fungal infection; nlp-29 expression is also induced following physical injury and osmotic stress; nlp-29 expression following fungal infection or physical wounding is regulated by a TIR-1, (Toll-interleukin 1 receptor (TIR) …
B0213.5	nlp-30	WBGene00003768	0.149824	2.576	0.628341	1	nlp-30 encodes five predicted neuropeptide-like proteins; in C. elegans, nlp-30 is part of the YGGWamide neuropeptide family that also contains nlp-24, nlp-25, and nlp-27-32; nlp-30 is expressed in the hypodermis, suggesting that the peptides it encodes may have a non-neuronal function; as loss of nlp-30 activity via large-scale RNAi screens does not result in any obvious abnormalities, the preci…
B0213.6	nlp-31	WBGene00003769	-0.0713889	4.68643	0.784448	1	nlp-31 encodes five predicted neuropeptide-like proteins; in C. elegans, nlp-31 is part of the YGGWamide neuropeptide family that also contains nlp-24, nlp-25, and nlp-27-32; nlp-31 is expressed in the hypodermis, and its expression is also detected in precomma-stage embryos; nlp-31 expression is upregulated in response to fungal infection and, when synthesized in vitro, demonstrates antifungal a…
B0218.1	faah-1	WBGene00015047	-0.108695	7.04996	0.536637	1	faah-1 encodes a putative fatty acid amide hydrolase enzyme and is orthologous to human fatty acid amide hydrolase (FAAH); faah-1 is involved in regulating N-acylethanolamines (NAEs), which are lipid-derived signalling molecules, reduced levels of which, under dietary restriction, result in increased lifespan; faah-1 functions to hydrolyse N-acylethanolamines (NAEs) like eicosapentaenoyl ethanola…
B0218.2	faah-2	WBGene00015048	-0.193526	6.78386	0.518201	1
B0218.3	pmk-1	WBGene00004055	-0.184353	5.45708	0.370219	1	pmk-1 encodes a mitogen-activated protein kinase (MAPK), orthologous to human p38 MAPK (OMIM:600289); PMK-1 is an essential component of the MAPK pathway that regulates the innate immune response; PMK-1 is required, upstream of CED-9, for eliciting gonadal programmed cell death in response to Salmonella enterica infection; PMK-1 physically interacts with the ATF-7 transcription factor to regulate…
B0218.5		WBGene00015049	0.0136542	1.45691	0.972573	1
B0218.6	clec-51	WBGene00015050	0.241461	3.78915	0.350498	1
B0218.7		WBGene00015051	1.40546	-0.511567	0.180665	1
B0218.8	clec-52	WBGene00015052	0.759648	4.9448	0.0490924	0.741643
B0222.1		WBGene00015053	0.0579304	4.07892	0.714143	1
B0222.10		WBGene00015058	-0.0258128	-0.486772	1	1
B0222.11		WBGene00044582	-0.468291	1.91015	0.100615	0.945242	B0222.11 encodes a novel protein with a predicted signal sequence that is highly conserved amongst other Caenorhabditis species.
B0222.2	pitr-2	WBGene00015054	NA	NA	NA	NA
B0222.3	pitr-3	WBGene00015055	0.481909	3.87629	0.0446301	0.711806
B0222.4	tag-38	WBGene00006418	-0.469933	3.65215	0.148345	1
B0222.5		WBGene00015056	-0.421818	3.47595	0.0187028	0.469247
B0222.6	col-144	WBGene00000717	-0.683648	7.14799	0.0316263	0.613325
B0222.7	col-145	WBGene00000718	-0.178354	0.795308	0.801662	1
B0222.8	col-10	WBGene00000599	-0.639833	7.26672	0.03718	0.658403	col-10 encodes a collagen protein; expressed exclusively in hypodermal cells
B0222.9	gad-3	WBGene00015057	-0.503922	5.33797	0.0168044	0.441609
B0228.1		WBGene00015059	-0.12859	3.49449	0.489527	1
B0228.4	cpna-2	WBGene00015061	-0.119818	8.64784	0.614281	1	cpna-2 encodes proteins with similarity to several InterPro domains including those of polycystin cation channels, von Willebrand factor, the DNA recombination repair protein BRCA2, protein-tyrosine phosphatase, non-receptor type-13, glyoxylate carboligase, and copines, Ca2+-dependent phosphatidylserine binding proteins; cpna-2::gfp reporter fusions are expressed in body wall muscle.
B0228.5	trx-1	WBGene00015062	0.709335	0.910304	0.0416642	0.690859	trx-1 encodes a thioredoxin, a small redox protein that functions as a protein-disulfide reductase; loss of trx-1 activity via a deletion mutation and RNAi indicates that trx-1 is required for normal adult lifespan; in vitro, TRX-1 is capable of reducing protein disulfide bonds in the presence of a mammalian thioredoxin reductase; a TRX-1::GFP fusion protein is expressed in the ASJL/R amphid chem…
B0228.6		WBGene00015063	0.0527464	3.68313	0.77167	1
B0228.7		WBGene00015064	-0.138322	5.92192	0.459141	1
B0228.8		WBGene00015065	NA	NA	NA	NA
B0228.9		WBGene00015066	0.393506	-0.0488989	0.457342	1
B0238.1		WBGene00015067	0.0767022	5.84417	0.734931	1
B0238.10	natc-2	WBGene00015074	-0.0778218	7.46579	0.792926	1	natc-2 encodes the C. elegans ortholog of N-alpha-acetyltransferase 30, the catalytic subunit of the N-alpha-acetyltransferase complex (NAT complex); NATC-2 is predicted to function in a NAT complex with NATC-1 to catalyze transfer of the acetyl group of Acetyl-CoA to the alpha-amino group of the N-terminal methionine of substrate proteins; natc-2(RNAi) enhances the dauer formation phenotype of d…
B0238.11		WBGene00015075	-0.012904	5.58683	0.940477	1
B0238.12		WBGene00015076	-0.604901	6.29703	0.0105943	0.344741	B0238.12 encodes a putative secreted TIL-domain protease inhibitor paralogous to SWM-1, ISL-1, and the products of 11 other C. elegans genes; B0238.12 and its relatives are collectively similar to other TIL-domain protease inhibitors from nematodes, insects, and vertebrates; B0238.12 has no obvious function in mass RNAi assays.
B0238.13		WBGene00015077	-1.27045	4.52272	0.00123981	0.0808471
B0238.15		WBGene00044537	-0.0168213	-0.670882	1	1
B0238.17	21ur-13827	WBGene00172308	NA	NA	NA	NA
B0238.3	srt-68	WBGene00015068	0.239594	-1.04692	0.85023	1
B0238.5	srt-67	WBGene00015069	NA	NA	NA	NA
B0238.6	srt-70	WBGene00015070	0.884587	-0.00240017	0.138304	1	srt-70 encodes a seven-transmembrane receptor; large-scale expression pattern studies have reported srt-70::gfp expression in the nervous system, including head and tail neurons and specifically, amphid and phasmid sensory neurons.
B0238.7		WBGene00015071	0.825328	0.171142	0.165881	1
B0238.8	srt-69	WBGene00015072	-0.175314	1.08525	0.643977	1
B0238.9		WBGene00015073	0.625422	2.20219	0.0806229	0.887193
B0240.1	rhr-2	WBGene00004359	0.0737647	3.59375	0.707989	1	rhr-2 encodes a predicted transmembrane protein with similarity to human Rh blood group antigens proposed to function in inorganic ion transport and metabolism; the role of RHR-2 in C. elegans development or behavior remains unclear, as loss of RHR-2 function via RNA-mediated interference does not result in any abnormalities.
B0240.2	spe-42	WBGene00007117	1.01949	0.0393088	0.248666	1	spe-42 encodes a novel sperm-specific seven-pass transmembrane protein with many metazoan homologs; SPE-42 has two functional domains, the DC-STAMP (dendritic cell-specific transmembrane protein) which is known to play a role in cell-cell fusion and the C4C4-type RING finger; the presumed Drosophila spe-42 orthologous gene, sneaky, is involved in sperm plasma membrane breakdown after sperm entry;…
B0240.3	daf-11	WBGene00000907	-0.231905	4.15736	0.176135	1	daf-11 encodes a transmembrane guanylate cyclase; daf-11 activity is required for a number of processes dependent upon normal chemosensory function, including dauer formation and recovery and chemotaxis to both volatile and non-volatile odorants; daf-11 is also required for axon formation; daf-11 acts together with daf-21 to regulate chemosensory function and genetically upstream of daf-12 with r…
B0240.4	npp-22	WBGene00007118	0.0189729	5.10166	0.901663	1	npp-22 encodes a nuclear pore complex protein that inhibits DHC-1 in vivo, and that is required for normal nuclear pore complexes; NPP-22 is orthologous to human TMEM48 and budding yeast NDC1; npp-22(RNAi) suppresses the lethality of conditional dhc-1 mutations, as well as the spindle length and cytokinesis defects of dhc-1(or195), indicating that NPP-22 negatively regulates dynein; npp-22(tm1845…
B0240.5		WBGene00197623	NA	NA	NA	NA
B0244.10		WBGene00015085	-0.229828	3.01726	0.335973	1
B0244.14		WBGene00200415	NA	NA	NA	NA
B0244.2	ida-1	WBGene00002048	0.0203143	8.82588	0.92866	1	ida-1 encodes a protein tyrosine phosphatase-like receptor, orthologous to the mammalian type I diabetes autoantigens IA-2 and phogrin that are expressed in dense core vesicles of neuroendocrine tissue and involved in regulated protein secretion; in C. elegans, IDA-1 appears to be required for regulating presynaptic neurotransmission and in particular, for the neuropeptidergic control of egg-layi…
B0244.4		WBGene00015079	0.38221	0.146402	0.404571	1
B0244.5		WBGene00015080	-0.251362	2.13929	0.306746	1
B0244.6		WBGene00015081	-0.169367	2.62058	0.536972	1
B0244.7		WBGene00015082	0.75277	0.34302	0.343056	1
B0244.8	egg-1	WBGene00015083	0.317556	2.02434	0.449683	1	egg-1 encodes a LDL-receptor repeat-containing protein that is required for fertilization; egg-1 acts redundantly with a similar protein, egg-2, and both proteins are expressed in the developing oocyte; egg-1 is not required for male fertility; egg-1 localizes to the oocyte plasma membrane; the structure and localization of the egg-1 protein suggest that it is required together with egg-2, for ga…
B0244.9		WBGene00015084	NA	NA	NA	NA
B0244.t1		WBGene00022897	NA	NA	NA	NA
B0244.t2		WBGene00022898	NA	NA	NA	NA
B0244.t3		WBGene00022899	NA	NA	NA	NA
B0250.1	rpl-2	WBGene00004413	-0.306787	10.5492	0.165363	1	rpl-2 encodes a large ribosomal subunit L8 protein.
B0250.11		WBGene00050926	NA	NA	NA	NA
B0250.12		WBGene00050927	0.0339671	4.43593	0.84338	1
B0250.15		WBGene00196688	NA	NA	NA	NA
B0250.2	calf-1	WBGene00007119	-0.126405	3.93649	0.4742	1	calf-1 encodes a novel Type I transmembrane protein conserved amongst nematodes; CALF-1 is required, along with UNC-36, for proper intracellular trafficking, presynaptic localization, and functional maturation of UNC-2, an alpha 1 subunit of the C. elegans neuronal CaV2 voltage-gated calcium channel, in sensory and motor neurons throughout development; calf-1 also functions in a calcium-dependent…
B0250.3		WBGene00007120	-0.303325	9.07394	0.145177	1
B0250.4		WBGene00007121	0.456034	4.10458	0.0638567	0.815028
B0250.5		WBGene00007122	0.187645	6.22147	0.292396	1
B0250.7		WBGene00007124	0.0849164	1.13583	0.800462	1
B0250.8		WBGene00007125	0.545038	0.277415	0.274363	1
B0250.9	dhcr-7	WBGene00007126	0.0106928	5.82352	0.959848	1	dhcr-7 encodes a protein orthologous to the human 7-DEHYDROCHOLESTEROL REDUCTASE (DHCR7; OMIM:602858), which when mutated leads to disease.
B0252.1		WBGene00015087	1.64489	3.81008	8.07048e-07	0.0001707
B0252.2	asm-1	WBGene00000211	0.161129	3.04428	0.466103	1	asm-1 encodes a protein similar to human acid sphingomyelinase (ASM) or sphingomyelin phosphodiesterase; the ASM-1 protein has a putative secretory signal peptide at the N-terminus, saposin-like and proline-rich domains and putative N-linked glycosylation sites; asm-1 shows phosphodiesterase activity when expressed in COS-7 cells; while mammalian ASM is detected as both intracellular and secreted…
B0252.3		WBGene00015088	-0.42202	5.04019	0.0417153	0.691077
B0252.4	cyn-10	WBGene00000886	0.0644639	2.43012	0.774043	1	cyn-10 encodes a divergent cyclophilin isoform that is functional when expressed in E. coli.
B0252.5		WBGene00015089	1.42217	0.440875	0.00385659	0.183163
B0252.8		WBGene00044615	0.332528	3.56748	0.197476	1
B0261.1		WBGene00015091	-0.0230338	5.74859	0.913983	1
B0261.2	let-363	WBGene00002583	0.0445234	7.76209	0.81401	1	let-363 encodes, by alternative splicing, two large (>2600-residue) proteins with C-terminal similarity to phosphatidylinositol kinase (PIK); LET-363 proteins are orthologous to S. cerevisiae Tor1p and Tor2p and human FRAP1 (OMIM:601231, mammalian target of FKBP12-rapamycin); LET-363 proteins are required for progression through the L3 stage of larval development and are thought to generally stim…
B0261.4	mrpl-47	WBGene00015092	0.0225453	5.39159	0.900157	1
B0261.5		WBGene00015093	NA	NA	NA	NA
B0261.6		WBGene00015094	-0.0157908	0.292212	0.981732	1
B0261.7		WBGene00015095	0.187986	2.78688	0.391277	1
B0261.8		WBGene00015096	-0.152724	3.14023	0.525346	1
B0261.9		WBGene00195057	NA	NA	NA	NA
B0272.1	tbb-4	WBGene00006538	-0.08859	4.94828	0.569343	1
B0272.2	memb-1	WBGene00007128	0.135376	2.29715	0.642218	1
B0272.3		WBGene00007129	0.333487	6.31567	0.361155	1	B0272.3 encodes a 3-hydroxyacyl-CoA dehydrogenase; by homology, the product of B0272.3 is predicted to function in mitochondrial fatty acid metabolism by catalyzing the NAD+-dependent oxidation of short-chain hydroxyacyl CoAs; large-scale expression studies indicate that B0272.3 is widely expressed.
B0272.4		WBGene00007130	0.694699	5.09083	0.219764	1
B0273.1		WBGene00015097	0.243148	0.690573	0.586989	1
B0273.111		WBGene00199390	NA	NA	NA	NA
B0273.2	puf-7	WBGene00004243	0.12682	0.209219	0.800958	1	puf-7 encodes a protein 97% identical to PUF-6 and functions redundantly with the other PUF genes, fbf-1, fbf-2, puf-6, and puf-8, during primordial germ cell development, based on combinatorial RNAi; interacts with NOS-2 in yeast two-hybrid screens.
B0273.23	21ur-1410	WBGene00048145	NA	NA	NA	NA
B0273.3	snpc-3.1	WBGene00015098	NA	NA	NA	NA
B0273.30	21ur-2735	WBGene00049511	NA	NA	NA	NA
B0273.4	unc-5	WBGene00006745	-0.0840131	5.52215	0.602435	1	unc-5 encodes a netrin receptor; unc-5 activity is required cell autonomously for dorsalward cell and pioneer motor axon migrations along the body wall that are essential for normal locomotion and gonad development; unc-5 mRNAs are expressed throughout the entire life cycle, with increasing levels seen as animals progess to adulthood.
B0273.74	21ur-12646	WBGene00169739	NA	NA	NA	NA
B0280.1	ggtb-1	WBGene00015099	-0.0618306	5.20614	0.706087	1
B0280.10	pot-1	WBGene00015105	0.201312	2.59119	0.320763	1
B0280.11		WBGene00015106	0.682597	0.38953	0.421558	1
B0280.12	glr-2	WBGene00001613	-0.0843088	3.43656	0.646682	1	glr-2 encodes an AMPA (non-NMDA)-type ionotropic glutamate receptor subunit; GLR-2 activity is required for mediating the behavioral response to light nose touch and for regulating the frequency with which animals change locomotory direction in response to sensory cues such as food; GLR-2 and GLR-1, a second AMPA-type ionotropic glutamate receptor, can interact to form functional heteromeric chan…
B0280.13		WBGene00015107	0.0934003	3.50451	0.659071	1
B0280.14	sls-2.5	WBGene00004837	NA	NA	NA	NA
B0280.15	sls-2.16	WBGene00004848	NA	NA	NA	NA
B0280.2		WBGene00015100	0.0624597	1.06946	0.875146	1
B0280.3	rpia-1	WBGene00015101	-0.0297004	7.17695	0.868954	1
B0280.4	odd-1	WBGene00003845	0.120498	0.0142238	0.854162	1	odd-1 encodes a C2H2-type zinc finger-containing transcription factor similar to Drosophila odd skipped which is required for embryonic patterning; ODD-1 is expressed in the gut during embryogenesis and appears to be essential for larval development.
B0280.5	cpg-2	WBGene00015102	0.755864	2.56039	0.0575694	0.78934	cpg-2 encodes a chondroitin proteoglycan with six chitin-binding peritrophin-A domains and three mucin-like regions; CPG-2 is individually dispensable for normal embryonic development; however, CPG-2 and CPG-1 are jointly required for osmotic integrity of early embryos, error-free chromosomal segregation during meiosis, polar body extrusion, association of the sperm pronucleus/centrosome complex …
B0280.6		WBGene00023224	NA	NA	NA	NA
B0280.7		WBGene00015103	2.5854	-0.559499	0.00033648	0.0297115
B0280.8	nhr-10	WBGene00003609	-0.204207	6.25194	0.23644	1	nhr-10 encodes a predicted nuclear hormone receptor diverged from nuclear hormone receptors in other phyla; its mRNA is expressed throughout development with possibly lower expression from the L4 larval to adult stages, and the protein is expressed in neuronal processes.
B0280.9		WBGene00015104	-0.0880374	5.70527	0.586997	1
B0281.1		WBGene00015108	NA	NA	NA	NA
B0281.3		WBGene00015110	-0.240374	4.39403	0.292346	1
B0281.4		WBGene00015111	0.341557	0.285755	0.575737	1
B0281.5		WBGene00015112	0.243784	2.20562	0.621096	1
B0281.6		WBGene00015113	0.200311	1.36394	0.59039	1
B0281.8		WBGene00015114	NA	NA	NA	NA
B0284.1		WBGene00007131	-0.532252	3.107	0.050548	0.751199
B0284.2		WBGene00007132	-0.184936	2.2867	0.508961	1
B0284.3		WBGene00007133	-0.22449	2.65151	0.370193	1
B0284.4		WBGene00007134	0.231655	0.27806	0.621788	1
B0284.5		WBGene00045188	-0.487389	2.39625	0.16933	1
B0285.1	cdk-12	WBGene00007135	0.132134	5.23411	0.431365	1
B0285.10	ckb-3	WBGene00000513	-0.504872	1.30773	0.204513	1	ckb-3 encodes a putative choline kinase; CKB-1 through CKB-4 comprise a related group ('B') of choline kinases.
B0285.11		WBGene00014641	-0.258715	1.37554	0.512925	1
B0285.12		WBGene00045168	1.23545	1.20901	0.128917	1
B0285.3		WBGene00007136	-0.0507545	3.42925	0.779	1
B0285.4		WBGene00007137	-0.0400443	4.88655	0.827093	1
B0285.5	hse-5	WBGene00002003	-0.106097	5.01249	0.470786	1	hse-5 encodes the C. elegans ortholog of the heparan sulfate modifying enzyme glucuronyl C5-epimerase; by homology, HSE-5 is predicted to function in heparan sulfate biosynthesis by catalyzing the chain-modifying epimerization of glucuronic acid to iduronic acid; during development, hse-5 activity is required for normal body size, locomotion, and nervous system development; an hse-5::gfp transcri…
B0285.6		WBGene00007138	-0.156269	3.27228	0.410505	1	B0285.6 encodes a predicted sodium-coupled carboxylate transporter that is one of four C. elegans proteins related to Drosophila Indy and the mammalian NaDC1 and NaDC3 transporters; B0285.6::lacZ reporter fusions are expressed in the excretory cell, from early larval stages through adulthood, with some later expression occasionally seen in two large unidentified structures on the dorsal side of t…
B0285.7	mnp-1	WBGene00007139	0.060273	6.07844	0.733938	1	mnp-1 encodes a protein related to the M1 family of metalloproteinases, but whose sequence indicates that it is unlikely to be catalytically active (MNP-1 lacks three of the four essential zinc-binding amino acids); during embryonic development mnp-1 activity is required, likely cell autonomously, for migration of muscle cells from their lateral positions to their final positions close to the dor…
B0285.8	ckb-1	WBGene00000511	0.0591419	3.67978	0.75353	1	ckb-1 encodes a putative choline kinase; CKB-1 through CKB-4 comprise a related group ('B') of choline kinases.
B0285.9	ckb-2	WBGene00000512	0.0698587	3.65847	0.823694	1	ckb-2 encodes an isoform of choline kinase whose activity has been verified in vitro; CKB-1 through CKB-4 comprise a related group ('B') of choline kinases; purified CKB-2 has a strong preference for choline over ethanolamine, a specific activity of 2.4 micromol/min/mg protein and a pH optimum near 10.
B0285.t1		WBGene00007475	NA	NA	NA	NA
B0286.1		WBGene00015115	-0.167814	4.72219	0.45078	1
B0286.2	lat-2	WBGene00002252	0.226913	5.29382	0.231995	1	lat-2 encodes a predicted transmembrane protein that is homologous to vertebrate latrophilins, alpha-latrotoxin binding proteins that are members of the Class B/secretin family of G protein-coupled receptors; by homology, LAT-2 is predicted to function as a peptide hormone receptor that couples ligand binding to heterotrimeric G protein-mediated stimulation of secretion; lat-2 is expressed in the…
B0286.3		WBGene00015116	-0.525442	4.71953	0.0362021	0.652479
B0286.4	ntl-2	WBGene00003825	-0.0114649	7.37405	0.939524	1
B0286.5	fkh-6	WBGene00001438	0.0862947	2.46767	0.756702	1	fkh-6 encodes one of 15 C. elegans forkhead transcription factors; fkh-6 is required for several aspects of male gonadogenesis including asymmetric cell division, cell migration and sex determination and appears to act downstream of tra-1; FKH-6 is specifically expressed in the gonad.
B0286.6	try-9	WBGene00023425	0.69858	-0.356179	0.368059	1
B0294.1		WBGene00015117	0.531178	3.15199	0.0139133	0.397133
B0302.1	sid-3	WBGene00002207	-0.0120313	5.53747	0.937684	1	sid-3 encodes a nonreceptor tyrosine kinase that is a member of the activated cdc-42-associated kinase (Ack) subfamily of cytoplasmic tyrosine kinases; in C. elegans sid-3 functions to regulate the import of dsRNA into cells, thus affecting the efficiency of RNA-mediated gene silencing (RNAi); SID-3 localizes to the cytoplasm.
B0302.2		WBGene00015119	NA	NA	NA	NA
B0302.4		WBGene00015121	NA	NA	NA	NA
B0302.5		WBGene00015122	0.103113	4.40101	0.60281	1
B0303.11		WBGene00015131	0.0200591	4.84696	0.915352	1
B0303.14		WBGene00015132	-0.0659331	3.4566	0.702738	1
B0303.15	mrpl-11	WBGene00015133	-0.142712	5.84989	0.345122	1
B0303.16		WBGene00044678	-0.127355	1.30756	0.717863	1
B0303.2	anmt-1	WBGene00015124	0.0632498	2.75524	0.785546	1
B0303.3		WBGene00015125	-0.0791769	6.85686	0.843049	1	B0303.3 is orthologous to the human gene 3-KETOACYL-COA THIOLASE BETA-SUBUNIT OF TRIFUNCTIONAL PROTEIN (HADHB; OMIM:143450), which when mutated leads to disease.
B0303.4		WBGene00015126	-0.0383644	5.86811	0.844816	1
B0303.7		WBGene00015128	-0.0268387	6.07962	0.870318	1
B0303.8	sdz-1	WBGene00015129	0.854017	0.0873432	0.109512	0.971818
B0303.9	vps-33.1	WBGene00015130	-0.0988765	4.96994	0.596344	1
B0304.2		WBGene00015134	-0.0138606	1.80531	0.981317	1
B0304.3	cyp-23A1	WBGene00015135	0.219197	2.73469	0.548364	1	cyp-23A1 encodes a cytochrome P450 homologous to the human gene CYP7B1, which when mutated leads to giant cell hepatitis (OMIM:231100); as a cytochrome P450, CYP-23A1 is predicted to function as a membrane-associated, heme-containing NADPH-dependent monooxygenases that catalyzes the oxidative metabolism of a variety of exogenous compounds and endogenous substrates.
B0304.4		WBGene00015136	-0.271489	1.01244	0.41784	1
B0304.5	sra-32	WBGene00005058	0.432316	-0.117188	0.438597	1
B0304.6	sra-33	WBGene00005059	-0.125138	0.613741	0.85624	1
B0304.7	sra-34	WBGene00005060	0.108265	1.01955	0.825573	1
B0304.8	sra-35	WBGene00005061	0.242407	-0.280613	0.753021	1
B0304.9	sra-36	WBGene00005062	0.0452704	0.561676	0.971162	1
B0310.1		WBGene00015137	-0.160347	5.05952	0.449086	1	B0310.1 encodes a nematode-specific transmembrane protein; loss of B0310.1 activity via RNAi results in reduced fat content in wild-type and tub-1 mutant animals, suggesting that B0301.1 plays a role in lipid metabolism.
B0310.10		WBGene00200480	NA	NA	NA	NA
B0310.11		WBGene00201176	0.878995	-0.58283	0.255962	1
B0310.2		WBGene00015138	0.304191	3.57769	0.178529	1
B0310.3		WBGene00015139	-0.00314321	2.22386	1	1
B0310.5	ugt-46	WBGene00015141	0.219132	6.15269	0.208404	1
B0310.6		WBGene00015142	0.443323	-0.560897	0.473979	1
B0331.1	cyp-29A4	WBGene00007140	-0.452298	1.40605	0.215694	1
B0331.2	pitr-4	WBGene00007141	0.188478	1.28921	0.715407	1
B0334.1	ttr-18	WBGene00007142	-0.199178	6.74754	0.464411	1
B0334.10		WBGene00007148	NA	NA	NA	NA
B0334.11	ooc-3	WBGene00003868	-0.214801	4.98758	0.178074	1	ooc-3 encodes a nematode-specific protein with a predicted signal sequence, four predicted transmembrane domains, and two putative PEST sequences; OOC-3 localizes to the endoplasmic reticulum (ER), and is maternally required for correct localization of PAR-2 and PAR-3 in the P1 blastomere of the two-cell stage embryo; specifically, OOC-3 is required for restricting PAR-3 to the anterior cortex of…
B0334.13		WBGene00007149	0.69854	-0.307672	0.197244	1
B0334.15	emc-5	WBGene00195248	NA	NA	NA	NA
B0334.17		WBGene00197047	NA	NA	NA	NA
B0334.18		WBGene00197809	NA	NA	NA	NA
B0334.2	twk-5	WBGene00006660	-0.109606	4.65499	0.492386	1	twk-5 encodes one of 44 C. elegans TWK (two-P domain K+) potassium channel subunits that contain two pore-forming domains and four transmembrane domains; as loss of TWK-5 function via RNA-mediated interference (RNAi) does not result in any abnormalities, the precise role of TWK-5 in C. elegans development and/or behavior is not yet known; TWK-5 may, however, function redundantly with other TWK ch…
B0334.3		WBGene00007143	0.113617	7.22549	0.701043	1
B0334.4		WBGene00007144	0.0172051	4.89378	0.923304	1
B0334.6		WBGene00007146	-0.403569	3.31176	0.125566	1
B0334.7	srh-44	WBGene00005267	9.20412e-05	1.71889	1	1
B0334.8	age-1	WBGene00000090	0.0518543	5.57224	0.777055	1	age-1 encodes the C. elegans ortholog of the phosphoinositide 3-kinase (PI3K) p110 catalytic subunit; AGE-1, supplied maternally and embryonically, is a central component of the C. elegans insulin-like signaling pathway, lying downstream of the DAF-2/insulin receptor and upstream of both the PDK-1 and AKT-1/AKT-2 kinases and the DAF-16 forkhead type transcription factor, whose negative regulation…
B0334.9		WBGene00007147	0.766964	-0.243254	0.408349	1	The B0334.9 gene encodes a protein whose central residues may be an ancient conserved domain in eukaryotes, being similar to the short coding sequence NKL044C from S. cerevisiae.
B0336.1	wrm-1	WBGene00006943	-0.093959	5.01213	0.585176	1	wrm-1 encodes, along with bar-1 and hmp-2, one of three C. elegans beta-catenin-like proteins; during development, wrm-1 functions in noncanonical Wnt signaling pathways that specify cell fates in the early embryo, the somatic gonad, and postembryonic hypodermal lineages.
B0336.10	rpl-23	WBGene00004435	-0.110205	11.2117	0.607187	1	rpl-23 encodes a large ribosomal subunit L23 protein.
B0336.11	hpo-28	WBGene00015148	-0.149353	5.99495	0.4022	1
B0336.12		WBGene00015149	NA	NA	NA	NA
B0336.13		WBGene00015150	0.203254	3.37487	0.299877	1
B0336.2	arf-1.2	WBGene00000182	-0.0536585	8.70412	0.790785	1	arf-1.2 encodes an ADP-ribosylation factor homolog required in vivo for embryonic development, fertility, locomotion, vulval development, and cuticular synthesis; ARF proteins are N-myristoylated GTPases that regulate membrane traffic and the actin cytoskeleton, and that activate both phospholipase D1 (PLD1) and phosphatidylinositol 4-phosphate 5-kinase.
B0336.3		WBGene00015143	-0.0261795	6.87413	0.877819	1
B0336.4	rgs-5	WBGene00004348	-0.0591709	4.24664	0.714483	1	rgs-5 encodes a regulator of G protein signaling; by homology, RGS-5 is predicted to function as a GTPase-activating protein that binds G protein alpha subunits and negatively regulates heterotrimeric G protein signaling; loss of rgs-5 activity via RNAi or a deletion mutation results in no obvious defects, and likewise, rgs-5 overexpression has no measurable effect on egg-laying behavior, locomot…
B0336.5		WBGene00015145	0.0598657	3.82012	0.775536	1
B0336.6	abi-1	WBGene00015146	-0.028774	5.06628	0.84828	1	abi-1 encodes an Abl interactor orthologous to human SSH3BP1 (ABI1; OMIM:603050, mutated in acute myeloid leukemia), ABI-2 (OMIM:606442), and NESH (OMIM:606363); abi-1 is required for epidermal cell migrations during embryonic enclosure, proper migration of the excretory cell, distal tip cell, and mechanosensory and motoneurons, and apoptotic cell engulfment; ABI-1 physically interacts with the M…
B0336.7		WBGene00015147	-0.0770714	3.48161	0.758353	1	B0336.7 encodes, by alternative splicing, two isoforms of a protein with a THAP or THAP-like domain; other proteins with such domains include LIN-15A, LIN-15B, LIN-36, and HIM-17 (which all interact with LIN-35/Rb), as well as CDC-14B, CTB-1, GON-14, and ~100 other proteins such as Drosophila P element transposase and human nuclear proapoptotic factor THAP1; B0336.7 is expressed in intestine and …
B0336.8	lgg-3	WBGene00002982	-0.023828	3.52967	0.914031	1	lgg-3 encodes a hydrophilic protein that is orthologous to Saccharomyces cerevisiae autophagy protein Apg12p; by homology, LGG-3 is predicted to function as a modifier protein required for a protein conjugation system essential for autophagy; in the context of this conjugation system, LGG-3 is predicted to interact with Apg7p and Apg5p homologs (encoded by M7.5 and Y71G12B.12a, respectively) to e…
B0336.9	swp-1	WBGene00006359	-0.143232	5.83557	0.603346	1	swp-1 encodes a protein containing two SWAP (Suppressor-of-White-APricot splicing regulator) domains that have been implicated in RNA binding; orthologous to C. briggsae CBG09000.
B0344.1		WBGene00023226	NA	NA	NA	NA
B0344.2	wrt-9	WBGene00006955	-0.320407	3.1298	0.371843	1	wrt-9 encodes a hedgehog-like protein, with an N-terminal signal sequence, a Wart domain, and a C-terminal region of proline-rich, low-complexity sequence; the Wart domain is predicted to form a cysteine-crosslinked protein involved in intercellular signalling, and it has subtle similarity to the N-terminal Hedge domain of HEDGEHOG proteins; WRT-9 has no obvious function in RNAi assays.
B0348.1		WBGene00015151	NA	NA	NA	NA
B0348.2		WBGene00015152	0.0210805	0.484522	1	1
B0348.4	egl-8	WBGene00001177	0.0428192	7.88165	0.839709	1	egl-8 encodes a phospholipase C beta; egl-8 activity is required for pharyngeal pumping, defecation, activity levels, and innate immunity; egl-8 is genetically downstream of egl-30 with respect to aldicarb-induced paralysis, and is expressed in most or all neurons, with the strongest staining in the head and tail ganglia, and in the intestine.
B0348.5		WBGene00015153	0.71991	0.154799	0.312981	1
B0348.6	ife-3	WBGene00002061	-0.10453	5.56149	0.507056	1	ife-3 encodes one of five C. elegans homologs of the mRNA cap-binding protein eIF4E; by homology, IFE-3 is predicted to bind capped mRNA and mediate its recruitment to ribosomes during translation initiation; in vitro, IFE-3 binds a monomethylated guanosine cap structure but does not bind a trimethylated guanosine cap, which suggests that IFE-3 likely mediates translation of those mRNAs that do n…
B0350.13	21ur-3043	WBGene00047225	NA	NA	NA	NA
B0350.2	unc-44	WBGene00006780	-0.0339426	9.80804	0.838441	1	The unc-44 gene encodes an ankyrin-like protein required for proper sex myoblast and axonal guidance during development.
B0350.3			NA	NA	NA	NA
B0350.63	21ur-8655	WBGene00174208	NA	NA	NA	NA
B0350.70		WBGene00196221	NA	NA	NA	NA
B0350.73		WBGene00199441	NA	NA	NA	NA
B0350.74		WBGene00199653	NA	NA	NA	NA
B0350.79		WBGene00201166	NA	NA	NA	NA
B0350.82		WBGene00202166	NA	NA	NA	NA
B0353.1		WBGene00015155	-0.0802463	0.694891	0.839717	1
B0361.10	ykt-6	WBGene00015164	-0.0246149	6.19106	0.889438	1
B0361.11		WBGene00015165	0.230374	0.383204	0.72661	1
B0361.2		WBGene00015156	-0.142638	4.95219	0.367289	1
B0361.3		WBGene00015157	-0.137966	4.65831	0.425233	1
B0361.4		WBGene00015158	-0.0377406	4.10745	0.837391	1
B0361.5	psd-1	WBGene00015159	-0.236304	6.64814	0.201953	1
B0361.6		WBGene00015160	-0.228918	5.27726	0.1612	1
B0361.7	pho-5	WBGene00015161	0.102311	5.26966	0.515936	1
B0361.8	algn-11	WBGene00015162	-0.0858562	5.37349	0.626846	1
B0361.9		WBGene00015163	0.0183729	6.48506	0.924741	1
B0365.1	acly-2	WBGene00007150	-0.220543	5.05315	0.157552	1
B0365.2		WBGene00007151	NA	NA	NA	NA
B0365.3	eat-6	WBGene00001137	-0.301179	11.0197	0.0799812	0.885356	eat-6 encodes an ortholog of the alpha subunit of a sodium/potassium ATPase, which in turn affects Na+,K(+)-ATPase activity of membranes by affecting the level of the phosphorylated intermediate of the Na+,K(+)-ATPase; EAT-6 affects relaxation of the pharyngeal muscles, fertility (and thus affects feeding); EAT-6 also affects body length, life span, and ASE, ASI and ASJ axonal outgrowth.
B0365.5	clec-225	WBGene00007152	-0.0816186	1.86737	0.787167	1
B0365.6	clec-41	WBGene00007153	-1.72546	5.43722	3.75182e-07	8.86306e-05
B0365.7	dhc-3	WBGene00007154	0.12505	2.85833	0.646891	1
B0379.1		WBGene00007155	-0.084425	6.0696	0.682688	1
B0379.11		WBGene00197704	NA	NA	NA	NA
B0379.2		WBGene00007156	0.127247	-0.297159	0.891332	1
B0379.3	mut-16	WBGene00003508	-0.0454058	5.57421	0.782654	1	mut-16 encodes a glutamine/asparagine (Q/N)-rich domain-containing protein that lacks obvious homologs outside of other nematode species; MUT-16 activity is required for RNA-mediated interference (RNAi), transgene silencing in germ-line and somatic tissues, and for maintaining low levels of transposon mobilization; MUT-16 is thus predicted to play a role in chromatin organizataion and/or regulati…
B0379.4	scpl-1	WBGene00007054	-0.0697741	6.63949	0.776123	1	scpl-1 encodes, by alternative splicing, two protein isoforms of a putative class-C RNA polymerase II (RNAPII) carboxyl-terminal domain (CTD) phosphatase, orthologous to budding yeast PSR1 and PSR2 and human CTDSP1 (OMIM:605323), CTDSP2 (OMIM:608711, amplified in sarcoma), and CTDSPL (OMIM:608592, deleted in epithelial cancer), and paralogous to C. elegans SCPL-3 and human CTDSPL2; more distantly…
B0379.6		WBGene00007158	-0.214808	0.929709	0.712936	1
B0379.7		WBGene00007159	0.275549	1.26259	0.608327	1
B0391.1		WBGene00007160	NA	NA	NA	NA
B0391.10		WBGene00007165	0.317193	1.53028	0.347946	1
B0391.11	fbxa-152	WBGene00007166	0.2943	4.66298	0.0746666	0.865086
B0391.4	str-12	WBGene00006080	0.608738	-0.12004	0.363395	1
B0391.5	fbxa-153	WBGene00007162	0.0438525	3.6549	0.786905	1	fbxa-153 encodes a protein with an N-terminal F-box domain and a C-terminal FTH domain; FBXA-153 has no obvious non-nematode orthologs; FBXA-153 shares N-terminal UNC-13 binding, and thus may share at least some functions, with ERI-1, W04D2.6, and Y55F3AM.13; FBXA-153 has no obvious function in mass RNAi assays.
B0391.6	fbxa-154	WBGene00007163	-0.0588187	1.34198	0.888585	1	This gene encodes a protein containing an F-box, a motif predicted to mediate protein-protein interactions either with homologs of yeast Skp-1p or with other proteins; this gene's encoded protein also contains an FTH/DUF38 motif, which may also mediate protein-protein interaction.
B0391.8		WBGene00014643	0.121983	1.95576	0.734289	1
B0391.9	fbxa-139	WBGene00007164	0.469322	-0.274726	0.444895	1
B0393.1	rps-0	WBGene00004469	-0.242347	11.3033	0.263207	1	rps-0 encodes a small ribosomal subunit SA protein that appears to function as both a ribosomal component and a laminin receptor; by homology, RPS-0 is predicted to play roles in protein biosynthesis and cell adhesion; in C. elegans, RPS-0 activity is required for embryonic and germline development, vulval morphogenesis, and the overall health of the animal.
B0393.14		WBGene00197966	NA	NA	NA	NA
B0393.2	rbg-3	WBGene00007167	-0.230649	5.40383	0.139817	1	rbg-3 encodes a predicted TBC domain-containing RabGTPase-activating protein (RabGAP) similar to the Ypt/Rab specific GTPase-activating protein gyp6; YPT/Rab GTPases and GAPs regulate eukaryotic vesicular transport; RBG-3 functions as a GTPase for both human and elegans RAB-7; rbg-3 interacts with tub-1/Tubby in yeast two-hybrid screens and regulates fat storage along with tub-1, but not life spa…
B0393.3		WBGene00007168	0.198187	4.07465	0.382373	1
B0393.4		WBGene00007169	1.27885	0.599559	0.171461	1
B0393.5		WBGene00007170	0.572005	2.19829	0.0870039	0.915112
B0393.6		WBGene00007171	0.478314	1.7887	0.215155	1
B0393.7		WBGene00007172	0.445823	1.35416	0.185006	1
B0393.8		WBGene00007173	NA	NA	NA	NA
B0393.9		WBGene00044636	0.0126584	4.41129	0.945549	1
B0395.1	nhx-1	WBGene00003729	0.287363	2.35456	0.425617	1	nhx-1 encodes a sodium/proton exchanger expressed intracellularly within hypodermal and muscle cells; NHX-1 is required for embryonic viability, and is thought to prevent intracellular acidification by catalysing the electroneutral exchange of vesicular sodium for an intracellular proton.
B0395.10		WBGene00201861	NA	NA	NA	NA
B0395.2	mboa-1	WBGene00007174	-0.127541	4.14721	0.556151	1	mboa-1 encodes a putative acyl-Coenzyme A:cholesterol ('sterol') O-acyltransferase, orthologous to human SOAT1 (OMIM:102642); MBOA-1 is required for normal locomotion and normally long lifespan in mass RNAi assays; mboa-1 is expressed in the seam cells and nervous systems of larvae and adults, and in the adult reproductive system.
B0395.3		WBGene00007175	0.193855	5.94198	0.470289	1	B0395.3 is orthologous to the human gene CHOLINE ACETYLTRANSFERASE ISOFORM R (CHAT; OMIM:118490), which when mutated leads to disease.
B0395.7		WBGene00199089	NA	NA	NA	NA
B0395.t1		WBGene00008104	NA	NA	NA	NA
B0399.1	kcnl-1	WBGene00007176	-0.0593456	5.67389	0.70476	1	kcnl-1 encodes a small-conductance calcium-activated potassium channel subunit.
B0399.2	oac-1	WBGene00007177	0.116856	1.36684	0.832029	1
B0399.3		WBGene00044980	NA	NA	NA	NA
B0399.t2		WBGene00014645	NA	NA	NA	NA
B0403.10		WBGene00197662	NA	NA	NA	NA
B0403.2	ubc-17	WBGene00006712	-0.158726	3.91833	0.412325	1
B0403.3		WBGene00015167	0.0613351	0.940171	0.902248	1
B0403.4	pdi-6	WBGene00015168	-0.189984	7.6058	0.25029	1
B0403.5		WBGene00015169	-0.00302895	2.10926	1	1
B0403.6		WBGene00043982	-0.121471	2.55043	0.633916	1
B0403.8		WBGene00196675	NA	NA	NA	NA
B0410.2	vang-1	WBGene00015171	0.0966309	3.50346	0.579861	1	vang-1 encodes an ortholog of Drosophila STRABISMUS/VAN GOGH; vang-1 enables Wnt-directed planar cell polarity; VANG-1 is required for the fully asymmetrical division of B.a versus B.p cells, though this requirement is quantitatively weak; vang-1 also negatively regulates adult lifespan via the DAF-2/IGFR insulin signaling pathway, and also plays a role in thermal tolerance and response to oxidat…
B0410.3		WBGene00015172	0.0324175	5.29867	0.916376	1
B0412.1	dac-1	WBGene00000895	0.234027	3.29263	0.453721	1	dac-1 encodes the C. elegans ortholog of Dachshund, a transcriptional regulator first described in Drosophila that is a member of the SKI/SNO/DAC family of proteins; dac-1 is expressed at higher levels in the AFD thermosensory neurons as compared to the AWB olfactory neurons and likely plays a role in thermosensory behavior as on thermal gradients dac-1 mutants fail to suppress cryophilic drive b…
B0412.2	daf-7	WBGene00000903	-0.13564	7.12864	0.480456	1	daf-7 encodes a member of the transforming growth factor beta superfamily; in C. elegans, DAF-7 functions as part of a signaling pathway that interprets environmental conditions to regulate energy-balance pathways that affect dauer larval formation, fat metabolism, egg laying, pathogen avoidance behavior, and feeding behavior; daf-7 reporter gene fusions are expressed in the ASI, ADE, and OLQ neu…
B0412.3	trpp-11	WBGene00015173	-0.116155	6.12603	0.596323	1
B0412.4	rps-29	WBGene00004498	-0.0950878	8.89591	0.708395	1	rps-29 encodes a small ribosomal subunit S29 protein; by homology, RPS-29 is predicted to function in protein biosynthesis; in C. elegans, RPS-29 activity is broadly required for embryonic and germline development, normal body coloration and morphology, normal postembryonic growth rates, and the overall health of the animal.
B0412.6		WBGene00023468	NA	NA	NA	NA
B0412.7		WBGene00044939	0.644672	-0.222819	0.26018	1
B0414.1	srz-4	WBGene00015175	0.854959	-0.0988751	0.182931	1
B0414.2	rnt-1	WBGene00004393	0.0150975	3.3219	0.945187	1	rnt-1 encodes a transcription factor that is the sole C. elegans member of the Runx family of transcriptional regulators; rnt-1 activity is required for several developmental processes, including regulation of hypodermal seam cell proliferation and proper development of the male tail; rnt-1 mutant animals also exhibit a slight reduction in body size which is enhanced by starvation; RNT-1 can phys…
B0414.3	hil-5	WBGene00001856	0.350416	3.53981	0.178454	1
B0414.5	cpb-3	WBGene00000772	0.28874	2.55558	0.361571	1	cpb-3 encodes a CPEB orthologous to Drosophila ORB, zebrafish ZORBA, and human CPEB1, and paralogous to FOG-1 and CPB-1/2; CPB-3 inhibits physiological apoptosis in oocytes, keeping it down to a normal level of ~50% in hermaphrodite gonads; independently of apoptosis, CPB-3 is also required for normal oogenesis, sperm/oocyte switching (upstream of FEM-3), and the transistion from mitosis to meios…
B0414.6	glh-3	WBGene00001600	0.112065	3.30766	0.557539	1	glh-3 encodes a predicted DEAD-like RNA helicase; GLH-3 interacts with itself and with CSN-5, KGB-1, ZYX-1, and GLH-1 in vitro, and is expressed in association with P granules throughout development.
B0414.7	mtk-1	WBGene00003472	-0.238196	6.78135	0.34685	1
B0414.8	vps-51	WBGene00015176	-0.257156	5.27752	0.122654	1	vps-51 encodes the C. elegans ortholog of the yeast Vps51p GARP (Golgi associated retrograde protein) complex subunit; in C. elegans, VPS-51 forms a GARP complex with VPS-52, VPS-53, and VPS-54; vps-51 is ubiquitously expressed, with particularly strong expression seen in neurons.
B0416.1	tmc-2	WBGene00015177	0.193958	5.02032	0.232477	1
B0416.2		WBGene00015178	NA	NA	NA	NA
B0416.3		WBGene00015179	0.22612	2.57364	0.343718	1
B0416.4		WBGene00015180	0.840407	0.190531	0.160888	1
B0416.5		WBGene00015181	-0.0779892	7.14846	0.617428	1
B0416.6	gly-13	WBGene00001638	-0.465723	5.15403	0.00410582	0.190452	gly-13 encodes an experimentally verified UDP-N-acetylglucosamine alpha-3-D-mannoside beta-1,2-N-acetylglucosaminyltransferase I (GnT I), that is the primary GnT I enzyme in vivo, and that can act on unusual substrates; gly-13 is expressed throughout development in many cell types; a deletion allele of gly-13 is partially lethal with survivors displaying severe morphological and behavioral defect…
B0416.7		WBGene00015182	0.807916	2.0773	0.0168359	0.441609
B0416.8		WBGene00195710	NA	NA	NA	NA
B0432.1		WBGene00015183	0.551141	-0.330798	0.402768	1
B0432.10		WBGene00015191	0.0581677	3.41686	0.744405	1
B0432.11		WBGene00015192	0.12792	-0.20348	0.878004	1
B0432.13		WBGene00015194	0.343868	2.24383	0.135225	1
B0432.14		WBGene00044640	-0.112543	5.07852	0.606184	1
B0432.2	djr-1.1	WBGene00015184	0.044762	5.22276	0.82002	1	djr-1.1 encodes a glyoxylase orthologous to human DJ-1 (OMIM:602533, mutated in early-onset Parkinson disease); DJR-1.1 is required for resistance to rotenone, a mitochondrial complex I inhibitor that mimics Parkinson disease (PD); djr-1.1(RNAi) animals are partly rescued from PD-like sensitivity by D-beta-hydroxybutyrate or tauroursodeoxycholic acid, and fully rescued by both; by orthology with …
B0432.3	mrpl-41	WBGene00015185	-0.0663705	6.83134	0.736965	1
B0432.4	misc-1	WBGene00015186	0.0417997	6.82434	0.879355	1
B0432.5	cat-2	WBGene00000296	0.103768	2.74505	0.706893	1	cat-2 encodes a tyrosine hydroxylase, the rate-limiting enzyme in the synthesis of catecholamines, such as dopamine; mutations in cat-2 affect dopamine levels that in turn affect locomotory slowing in response to food; CAT-2 demonstrates tyrosine hydroxylase activity in vitro, and this activity can be regulated, in vitro, by phosphorylation of CAT-2 Ser35 by protein kinase A; CAT-2 activity does …
B0432.6			-0.00360492	3.02749	0.993325	1
B0432.7		WBGene00015188	-0.00243131	3.3091	0.996506	1
B0432.8		WBGene00015189	NA	NA	NA	NA
B0432.9		WBGene00015190	0.148391	2.5246	0.614163	1
B0454.1	lin-8	WBGene00002997	0.00616434	3.7023	0.980385	1	lin-8 is a class A synthetic multivulva (synMuv) gene that functions redundantly with class B synMuv genes to negatively regulate Ras-mediated signaling during vulval induction.
B0454.10	sri-30	WBGene00005542	-0.135122	1.41978	0.700848	1
B0454.13		WBGene00195464	NA	NA	NA	NA
B0454.2	sri-31	WBGene00005543	0.286381	1.68829	0.400073	1
B0454.24		WBGene00202018	NA	NA	NA	NA
B0454.3	sri-28	WBGene00005540	-0.0774557	0.896164	0.896898	1
B0454.4	sri-29	WBGene00005541	0.0904856	0.766558	0.846307	1
B0454.5		WBGene00015196	-0.26419	2.09322	0.465745	1
B0454.6		WBGene00015197	0.0876108	4.40846	0.667079	1
B0454.7	clec-2	WBGene00015198	-0.514862	1.35258	0.401379	1
B0454.8		WBGene00015199	0.535619	0.212155	0.540987	1
B0454.9		WBGene00015200	0.0195017	4.3663	0.938859	1
B0457.1	lat-1	WBGene00002251	-0.0342402	7.05459	0.838526	1	lat-1 encodes a seven transmembrane domain receptor that is a member of the adhesion class of G protein-couple receptors (aGPRCs) and the nematode homolog of Latrophilin/CIRL/LPHN/CL; lat-1 is required for embryonic elongation, pharyngeal development, and sperm development and/or function; LAT-1 is expressed in developing epithelia, specifically in left epidermoblasts during dorsal intercalation,…
B0457.14		WBGene00199885	NA	NA	NA	NA
B0457.2		WBGene00007178	-0.0643618	5.14283	0.735853	1
B0457.3		WBGene00014660	NA	NA	NA	NA
B0457.4		WBGene00007179	1.24398	-0.358746	0.0915834	0.924617
B0457.6		WBGene00007180	-0.533986	4.39556	0.0139526	0.397178
B0462.1		WBGene00007181	0.356434	2.36198	0.380969	1
B0462.2	sri-68	WBGene00005580	0.569721	0.444102	0.442305	1
B0462.3	fbxb-119	WBGene00007182	1.4562	0.559066	0.00757832	0.275699
B0462.4		WBGene00007183	0.0901653	0.443482	1	1
B0462.5		WBGene00194695	0.208525	1.41273	0.597899	1
B0464.1	dars-1	WBGene00001094	-0.135928	7.24155	0.386369	1	drs-1 encodes a putative aspartyl(D) tRNA synthetase
B0464.2	ctr-9	WBGene00007184	-0.0508496	6.5594	0.81063	1	ctr-9 encodes the C. elegans ortholog of mammalian and Saccharomyces cerevisiae CTR9 that is a member of the PAF1 (Polymerase-Associated Factor 1) complex; by homology CTR-9 is predicted to function in the regulation of transcription.
B0464.3	nlp-36	WBGene00007185	-0.0861862	6.35779	0.708588	1
B0464.4	bre-3	WBGene00000268	-0.305166	5.47722	0.0667363	0.827834	bre-3 encodes a protein similar to beta-glycosyltransferases from bacteria that is required for the toxicity of Bacillus thuringiensis Cry5B; BRE-3 may act in a pathway with bre-5 and is expressed and functions in the gut epithelium.
[truncated: 22,070 more rows]

## Sheet: (3) I_1hrvs.I_24hr
sequence	symbol	primaryIdentifier	logFC	logCPM	PValue	FDR	briefDescription
[truncated: 22,581 more rows]

## Sheet: (4) IF_1hrvs.IF_24hr
sequence	symbol	primaryIdentifier	logFC	logCPM	PValue	FDR	briefDescription
[truncated: 22,581 more rows]

[truncated: 7 more sheets: (5) NoIvNoFood1hrvs.NoIvFood1hr, (6) IvFood1hrvs.NoIvFood1hr, (7) IvNoFood1hrvs.NoIvNoFood1hr, CPM, GOrilla, Larval Development genes, Metabolic process genes]
